# Supplementary material for: Size-Frequency Distributions along a Latitudinal Gradient in Middle Permian Fusulinoideans
Source: PLoS One. 2012 Jun 7;7(6):e38603. doi: 10.1371/journal.pone.0038603 (PMC3369838; doi:10.1371/journal.pone.0038603)
Supplement: Table S1 — The Middle Permian fusulinoidean database used in the analysis. (XLSX) [file pone.0038603.s001.xlsx]

## Sheet: Sheet1
Family	Fam	Genus	Species	Terrane	Length	Width	Palaeobiogeography	Keriotheca	Shape	block number	Reference
Neoschwagerinidae Dunbar et Condra,1927	Neo	Afghanella Thompson,1946	Afghanella schencki Thompson, 1946	North Afghanistan	3.195	1.72	equatorial areas	Y	Fusiform	21	[1]
Neoschwagerinidae Dunbar et Condra,1927	Neo	Afghanella Thompson,1946	Afghanella schencki Thompson, 1946	North Afghanistan	3.865	2.105	equatorial areas	Y	Fusiform	21
Schwagerinidae Dunbar et Henbest,1930	Schwag	Eopolydiexodina Wilde,1975	Eopolydiexodina afghanensis (Thompson,1946)	North Afghanistan	20.06	3.87	equatorial areas	Y	Fusiform	21
Verbeekinidae Staff et Wedekina,1910	Verb	Eoverbeekina Lee,1933	Eoverbeekina intermedia Lee,1933	South China	1.6	1.813	equatorial areas	Y	Fusiform	35
Verbeekinidae Staff et Wedekina,1910	Verb	Eoverbeekina Lee,1933	Eoverbeekina cheni Thompson et Foster,1937	South China	2.86	2.62	equatorial areas	Y	Fusiform	35
Verbeekinidae Staff et Wedekina,1910	Verb	Eoverbeekina Lee,1933	Eoverbeekina intermedia Lee,1933	South China	2.94	3.947	equatorial areas	Y	Fusiform	35
Neoschwagerinidae Dunbar et Condra,1927	Neo	Lepidolina Lee,1933	Lepidolina multiseptata (Deprat,1912)	Indochina Block	7.853	5.14	equatorial areas	Y	Fusiform	13
Schwagerinidae Dunbar et Henbest,1930	Schwag	Nagatoella Thompson,1936	Nagatoella orientalis (Ozawa,1925)	Akiyoshi Terrane	6.27	3.9	equatorial areas	Y	Fusiform	1
Schubertellidae Skinner,1931	Schu	Neofusulinella Deprat,1912	Neofusulinella giraudi Deprat,1915	Indochina Block	1.218	0.662	equatorial areas	N	Fusiform	13
Schubertellidae Skinner,1931	Schu	Neofusulinella Deprat,1912	Neofusulinella giraudi Deprat,1915	Indochina Block	1.122	0.718	equatorial areas	N	Fusiform	13
Schubertellidae Skinner,1931	Schu	Neofusulinella Deprat,1912	Neofusulinella simplex (Lange, 1925)	South China	0.638	0.373	equatorial areas	N	Fusiform	35
Neoschwagerinidae Dunbar et Condra,1927	Neo	Neoschwagerina Yabe,1903	Neoschwagerina haydeni Dutkevich and Khabakov, 1934	North Afghanistan	4.69	3.525	equatorial areas	Y	Fusiform	21
Schwagerinidae Dunbar et Henbest,1930	Schwag	Nipponitella Hanzawa,1938	Nipponitella explicata Hanzawa,1938	Akiyoshi Terrane	5.18	1.54	equatorial areas	Y	Fusiform	1
Schwagerinidae Dunbar et Henbest,1930	Schwag	Nipponitella Hanzawa,1938	Nipponitella explicata Hanzawa,1938	Akiyoshi Terrane	5.42	1.79	equatorial areas	Y	Fusiform	1
Staffellidae A.D.Miklukho-Maklay, 1949	Staff	Pisolina Lee,1933	Pisolina excessa Lee,1933	South China	3.68	4.173	equatorial areas	N	Lenticular	35
Staffellidae A.D.Miklukho-Maklay, 1949	Staff	Sphaerulina Lee,1933	Sphaerulina crassispira Lee,1933	South China	0.993	1.1	equatorial areas	N	Lenticular	35
Staffellidae A.D.Miklukho-Maklay, 1949	Staff	Sphaerulina Lee,1933	Sphaerulina crassispira Lee,1933	South China	1.03	1.143	equatorial areas	N	Lenticular	35
Staffellidae A.D.Miklukho-Maklay, 1949	Staff	Sphaerulina Lee,1933	Sphaerulina crassispira Lee,1933	South China	1.53	1.537	equatorial areas	N	Lenticular	35
Neoschwagerinidae Dunbar et Condra,1927	Neo	Sumatrina Volz,1904	Sumatrina annae Volz,1904	Indochina Block	4.713	1.587	equatorial areas	Y	Fusiform	13
Neoschwagerinidae Dunbar et Condra,1927	Neo	Sumatrina Volz,1904	Sumatrina longissima Deprat,1914	Indochina Block	9.393	2.187	equatorial areas	Y	Fusiform	13
Verbeekinidae Staff et Wedekina,1910	Verb	Verbeekina Staff,1909	Verbeekina verbeeki (Geinitz,1876)	Indochina Block	6.46	6.62	equatorial areas	Y	Fusiform	13
Verbeekinidae Staff et Wedekina,1910	Verb	Verbeekina Staff,1909	Verbeekina grabaui Thompson et Foster,1937	South China	4.01	4.03	equatorial areas	Y	Fusiform	35
Verbeekinidae Staff et Wedekina,1910	Verb	Verbeekina Staff,1909	Verbeekina heimi Thompson et Foster,1937	South China	7.39	7.75	equatorial areas	Y	Fusiform	35
Neoschwagerinidae Dunbar et Condra,1927	Neo	Yabeina Deprat,1914	Yabeina kwangsiana (Lee,1933)	South China	6.887	3.687	equatorial areas	Y	Fusiform	35
Schwagerinidae Dunbar et Henbest,1930	Schwag	Chusenella Hsu,1942	Chusenella douvillei (Colani,1924)	South China	8.32	2.82	equatorial areas	Y	Fusiform	35	[2]
Schwagerinidae Dunbar et Henbest,1930	Schwag	Chusenella Hsu,1942	Chusenella globularis (Gubler,1935)	South China	10.64	4.04	equatorial areas	Y	Fusiform	35
Schwagerinidae Dunbar et Henbest,1930	Schwag	Chusenella Hsu,1942	Chusenella globularis (Gubler,1935)	South China	7.79	4.19	equatorial areas	Y	Fusiform	35
Schwagerinidae Dunbar et Henbest,1930	Schwag	Chusenella Hsu,1942	Chusenella globularis (Gubler,1935)	South China	9	4.34	equatorial areas	Y	Fusiform	35
Schwagerinidae Dunbar et Henbest,1930	Schwag	Chusenella Hsu,1942	Chusenella douvillei (Colani,1924)	South China	8.96	2.92	equatorial areas	Y	Fusiform	35
Schwagerinidae Dunbar et Henbest,1930	Schwag	Chusenella Hsu,1942	Chusenella douvillei (Colani,1924)	South China	4.84	1.96	equatorial areas	Y	Fusiform	35
Schwagerinidae Dunbar et Henbest,1930	Schwag	Chusenella Hsu,1942	Chusenella douvillei (Colani,1924)	South China	6.25	2.3	equatorial areas	Y	Fusiform	35
Schwagerinidae Dunbar et Henbest,1930	Schwag	Chusenella Hsu,1942	Chusenella douvillei (Colani,1924)	South China	5.7	2.2	equatorial areas	Y	Fusiform	35
Schwagerinidae Dunbar et Henbest,1930	Schwag	Chusenella Hsu,1942	Chusenella liangshanensis (Sheng,1956)	South China	6.7	3.71	equatorial areas	Y	Fusiform	35
Schwagerinidae Dunbar et Henbest,1930	Schwag	Chusenella Hsu,1942	Chusenella liangshanensis (Sheng,1956)	South China	5.4	2.75	equatorial areas	Y	Fusiform	35
Neoschwagerinidae Dunbar et Condra,1927	Neo	Lepidolina Lee,1933	Lepidolina shiraiwensis (Ozawa, 1925)	South China	4.16	2.015	equatorial areas	Y	Fusiform	35
Neoschwagerinidae Dunbar et Condra,1927	Neo	Lepidolina Lee,1933	Lepidolina shiraiwensis (Ozawa, 1925)	South China	7.92	3.9	equatorial areas	Y	Fusiform	35
Schubertellidae Skinner,1931	Schu	Neofusulinella Deprat,1912	Neofusulinella simplex (Lange, 1925)	South China	0.67	0.293	equatorial areas	N	Fusiform	35
Schubertellidae Skinner,1931	Schu	Neofusulinella Deprat,1912	Neofusulinella simplex (Lange, 1925)	South China	0.7	0.373	equatorial areas	N	Fusiform	35
Schubertellidae Skinner,1931	Schu	Neofusulinella Deprat,1912	Neofusulinella simplex (Lange, 1925)	South China	0.83	0.38	equatorial areas	N	Fusiform	35
Neoschwagerinidae Dunbar et Condra,1927	Neo	Neoschwagerina Yabe,1903	Neoschwagerina craticulifera (Schwager, 1883)	South China	3.11	2.315	equatorial areas	Y	Fusiform	35
Neoschwagerinidae Dunbar et Condra,1927	Neo	Neoschwagerina Yabe,1903	Neoschwagerina craticulifera (Schwager, 1883)	South China	3.44	2.38	equatorial areas	Y	Fusiform	35
Schwagerinidae Dunbar et Henbest,1930	Schwag	Paraschwagerina Dunbar et Skinner,1936	Paraschwagerina quasifosteri Sheng,1956	South China	7.91	4.53	equatorial areas	Y	Fusiform	35
Schwagerinidae Dunbar et Henbest,1930	Schwag	Paraschwagerina Dunbar et Skinner,1936	Paraschwagerina quasifosteri Sheng,1956	South China	8.32	4.8	equatorial areas	Y	Fusiform	35
Verbeekinidae Staff et Wedekina,1910	Verb	Pseudodoliolina Yabe et Hanzawa,1932	Pseudodoliolina ozawai Yabe et Hanzawa,1932	South China	3.035	1.504	equatorial areas	Y	Fusiform	35
Verbeekinidae Staff et Wedekina,1910	Verb	Pseudodoliolina Yabe et Hanzawa,1932	Pseudodoliolina ozawai Yabe et Hanzawa,1932	South China	3.6	1.76	equatorial areas	Y	Fusiform	35
Schwagerinidae Dunbar et Henbest,1930	Schwag	Schwagerina Moeller,1877	Schwagerina pseudocompacta Sheng,1956	South China	2.225	0.835	equatorial areas	Y	Fusiform	35
Schwagerinidae Dunbar et Henbest,1930	Schwag	Schwagerina Moeller,1877	Schwagerina pseudocompacta Sheng,1956	South China	3.135	1.4	equatorial areas	Y	Fusiform	35
Schwagerinidae Dunbar et Henbest,1930	Schwag	Schwagerina Moeller,1877	Schwagerina pseudocompacta Sheng,1956	South China	4.2	1.52	equatorial areas	Y	Fusiform	35
Schwagerinidae Dunbar et Henbest,1930	Schwag	Schwagerina Moeller,1877	Schwagerina longipertica Chen,1956	South China	7.13	2.35	equatorial areas	Y	Fusiform	35
Schwagerinidae Dunbar et Henbest,1930	Schwag	Schwagerina Moeller,1877	Schwagerina longipertica Chen,1956	South China	10.75	2.82	equatorial areas	Y	Fusiform	35
Schwagerinidae Dunbar et Henbest,1930	Schwag	Schwagerina Moeller,1877	Schwagerina multialveola Chen,1956	South China	6.2	2.84	equatorial areas	Y	Fusiform	35
Schwagerinidae Dunbar et Henbest,1930	Schwag	Schwagerina Moeller,1877	Schwagerina multialveola Chen,1956	South China	6.42	3.37	equatorial areas	Y	Fusiform	35
Neoschwagerinidae Dunbar et Condra,1927	Neo	Sumatrina Volz,1904	Sumatrina longissima Deprat,1914	South China	7	2	equatorial areas	Y	Fusiform	35
Verbeekinidae Staff et Wedekina,1910	Verb	Verbeekina Staff,1909	Verbeekina grabaui Thompson et Foster,1937	South China	3.74	4.04	equatorial areas	Y	Fusiform	35
Verbeekinidae Staff et Wedekina,1910	Verb	Verbeekina Staff,1909	Verbeekina grabaui Thompson et Foster,1937	South China	4.14	4.82	equatorial areas	Y	Fusiform	35
Verbeekinidae Staff et Wedekina,1910	Verb	Verbeekina Staff,1909	Verbeekina grabaui Thompson et Foster,1937	South China	4.74	5.12	equatorial areas	Y	Fusiform	35
Neoschwagerinidae Dunbar et Condra,1927	Neo	Afghanella Thompson,1946	Afghanella schencki Thompson, 1946	South China	3.73	2.51	equatorial areas	Y	Fusiform	35	[3]
Neoschwagerinidae Dunbar et Condra,1927	Neo	Afghanella Thompson,1946	Afghanella cheni Yang,1985	South China	8.61	4.61	equatorial areas	Y	Fusiform	35
Verbeekinidae Staff et Wedekina,1910	Verb	Armenina M.-Maclay,1955	Armenina crassispira (Chen,1956)	South China	5.87	5.38	equatorial areas	Y	Fusiform	35
Schwagerinidae Dunbar et Henbest,1930	Schwag	Chalaroschwagerina Skinner et Wilde,1965	Chalaroschwagerina mengi (Chen,1956)	South China	9.47	5.62	equatorial areas	Y	Fusiform	35
Schwagerinidae Dunbar et Henbest,1930	Schwag	Chusenella Hsu,1942	Chusenella tieni (Chen,1956)	South China	2.79	0.69	equatorial areas	Y	Fusiform	35
Schwagerinidae Dunbar et Henbest,1930	Schwag	Chusenella Hsu,1942	Chusenella wuhsuehensis (Chen,1956)	South China	6.5	1.43	equatorial areas	Y	Fusiform	35
Schwagerinidae Dunbar et Henbest,1930	Schwag	Chusenella Hsu,1942	Chusenella tingi Chen,1956	South China	4.05	1.77	equatorial areas	Y	Fusiform	35
Schwagerinidae Dunbar et Henbest,1930	Schwag	Chusenella Hsu,1942	Chusenella conicocylindrica Chen,1956	South China	6.57	2.34	equatorial areas	Y	Fusiform	35
Schwagerinidae Dunbar et Henbest,1930	Schwag	Chusenella Hsu,1942	Chusenella brevibola (Chen,1956)	South China	4.46	2.36	equatorial areas	Y	Fusiform	35
Schwagerinidae Dunbar et Henbest,1930	Schwag	Chusenella Hsu,1942	Chusenella henbesti (Chen,1956)	South China	8.28	2.42	equatorial areas	Y	Fusiform	35
Schwagerinidae Dunbar et Henbest,1930	Schwag	Chusenella Hsu,1942	Chusenella sinensis Sheng,1963	South China	6.09	2.69	equatorial areas	Y	Fusiform	35
Schwagerinidae Dunbar et Henbest,1930	Schwag	Chusenella Hsu,1942	Chusenella sinensis Sheng,1963	South China	6.09	2.69	equatorial areas	Y	Fusiform	35
Schwagerinidae Dunbar et Henbest,1930	Schwag	Chusenella Hsu,1942	Chusenella douvillei (Colani,1924)	South China	7.07	3.18	equatorial areas	Y	Fusiform	35
Schwagerinidae Dunbar et Henbest,1930	Schwag	Chusenella Hsu,1942	Chusenella douvillei (Colani,1924)	South China	7.07	3.18	equatorial areas	Y	Fusiform	35
Neoschwagerinidae Dunbar et Condra,1927	Neo	Colania Lee,1933	Colania douvillei (Ozawa, 1925)	South China	5.98	3.28	equatorial areas	Y	Fusiform	35
Neoschwagerinidae Dunbar et Condra,1927	Neo	Colania Lee,1933	Colania douvillei (Ozawa, 1925)	South China	5.98	3.28	equatorial areas	Y	Fusiform	35
Schubertellidae Skinner,1931	Schu	Lantschichites Toumanskaya,1953	Lantschichites minima (Chen,1956)	South China	2.6	0.54	equatorial areas	N	Fusiform	35
Neoschwagerinidae Dunbar et Condra,1927	Neo	Lepidolina Lee,1933	Lepidolina kumaensis Kanmera,1954	South China	9.05	2.96	equatorial areas	Y	Fusiform	35
Neoschwagerinidae Dunbar et Condra,1927	Neo	Lepidolina Lee,1933	Lepidolina shiraiwensis (Ozawa, 1925)	South China	8.34	3.27	equatorial areas	Y	Fusiform	35
Neoschwagerinidae Dunbar et Condra,1927	Neo	Lepidolina Lee,1933	Lepidolina shiraiwensis (Ozawa, 1925)	South China	8.34	3.27	equatorial areas	Y	Fusiform	35
Verbeekinidae Staff et Wedekina,1910	Verb	Metadoliolina Ishii et Nogami,1961	Metadoliolina lepida (Schwager,1883)	South China	6.42	4.85	equatorial areas	Y	Fusiform	35
Verbeekinidae Staff et Wedekina,1910	Verb	Metadoliolina Ishii et Nogami,1961	Metadoliolina lepida (Schwager,1883)	South China	6.42	4.85	equatorial areas	Y	Fusiform	35
Verbeekinidae Staff et Wedekina,1910	Verb	Metadoliolina Ishii et Nogami,1961	Metadoliolina douvillei (Gubler,1935)	South China	8.34	5.53	equatorial areas	Y	Fusiform	35
Staffellidae A.D.Miklukho-Maklay, 1949	Staff	Nankinella Lee,1933	Nankinella hunanensis (Chen,1956)	South China	1.65	2.87	equatorial areas	N	Lenticular	35
Staffellidae A.D.Miklukho-Maklay, 1949	Staff	Nankinella Lee,1933	Nankinella hunanensis (Chen,1956)	South China	1.65	2.87	equatorial areas	N	Lenticular	35
Staffellidae A.D.Miklukho-Maklay, 1949	Staff	Nankinella Lee,1933	Nankinella inflata (Colani,1924)	South China	2.36	3.04	equatorial areas	N	Lenticular	35
Neoschwagerinidae Dunbar et Condra,1927	Neo	Neoschwagerina Yabe,1903	Neoschwagerina colaniae Ozawa,1927	South China	3.25	2.54	equatorial areas	Y	Fusiform	35
Neoschwagerinidae Dunbar et Condra,1927	Neo	Neoschwagerina Yabe,1903	Neoschwagerina simplex Ozawa,1927	South China	4.73	2.96	equatorial areas	Y	Fusiform	35
Neoschwagerinidae Dunbar et Condra,1927	Neo	Neoschwagerina Yabe,1903	Neoschwagerina craticulifera (Schwager, 1883)	South China	6.38	3.5	equatorial areas	Y	Fusiform	35
Neoschwagerinidae Dunbar et Condra,1927	Neo	Neoschwagerina Yabe,1903	Neoschwagerina craticulifera (Schwager, 1883)	South China	6.38	3.5	equatorial areas	Y	Fusiform	35
Neoschwagerinidae Dunbar et Condra,1927	Neo	Neoschwagerina Yabe,1903	Neoschwagerina megasphaerica Deprat, 1913	South China	7.63	3.57	equatorial areas	Y	Fusiform	35
Neoschwagerinidae Dunbar et Condra,1927	Neo	Neoschwagerina Yabe,1903	Neoschwagerina margaritae Deprat, 1913	South China	5.28	4.11	equatorial areas	Y	Fusiform	35
Neoschwagerinidae Dunbar et Condra,1927	Neo	Neoschwagerina Yabe,1903	Neoschwagerina margaritae Deprat, 1913	South China	5.28	4.11	equatorial areas	Y	Fusiform	35
Neoschwagerinidae Dunbar et Condra,1927	Neo	Neoschwagerina Yabe,1903	Neoschwagerina margaritae Deprat, 1913	South China	5.28	4.11	equatorial areas	Y	Fusiform	35
Neoschwagerinidae Dunbar et Condra,1927	Neo	Neoschwagerina Yabe,1903	Neoschwagerina multicircumvoluta Deprat, 1912	South China	5.29	4.64	equatorial areas	Y	Fusiform	35
Neoschwagerinidae Dunbar et Condra,1927	Neo	Neoschwagerina Yabe,1903	Neoschwagerina hukoensis K.Miklukho-Maclay, 1954	South China	6.86	5.62	equatorial areas	Y	Fusiform	35
Schwagerinidae Dunbar et Henbest,1930	Schwag	Parafusulina Dunbar et Skinner,1931	Parafusulina granumavenae (Roemer,1880)	South China	12.66	3.34	equatorial areas	Y	Fusiform	35
Verbeekinidae Staff et Wedekina,1910	Verb	Paraverbeekina M.-Maclay,1955	Paraverbeekina ellipsoidalis (Chen,1956)	South China	6.24	4.77	equatorial areas	Y	Fusiform	35
Schwagerinidae Dunbar et Henbest,1930	Schwag	Pseudofusulina Dunbar et Skinner,1931	Pseudofusulina yui (Chen,1956)	South China	5.38	1.15	equatorial areas	Y	Fusiform	35
Schwagerinidae Dunbar et Henbest,1930	Schwag	Pseudofusulina Dunbar et Skinner,1931	Pseudofusulina megalocula (Chen,1956)	South China	5.59	1.88	equatorial areas	Y	Fusiform	35
Schwagerinidae Dunbar et Henbest,1930	Schwag	Pseudofusulina Dunbar et Skinner,1931	Pseudofusulina lingyunensis (Chen,1956)	South China	5.12	1.92	equatorial areas	Y	Fusiform	35
Schwagerinidae Dunbar et Henbest,1930	Schwag	Pseudofusulina Dunbar et Skinner,1931	Pseudofusulina yunnanensis (Chen, 1956)	South China	7.1	2.72	equatorial areas	Y	Fusiform	35
Schwagerinidae Dunbar et Henbest,1930	Schwag	Rugososchwagerina M.-Maclay,1956	Rugososchwagerina shengi (Chen)	South China	8.06	5.21	equatorial areas	Y	Fusiform	35
Schwagerinidae Dunbar et Henbest,1930	Schwag	Rugososchwagerina M.-Maclay,1956	Rugososchwagerina chinensis (Chen,1956)	South China	10.44	5.22	equatorial areas	Y	Fusiform	35
Schwagerinidae Dunbar et Henbest,1930	Schwag	Rugososchwagerina M.-Maclay,1956	Rugososchwagerina shengi (Chen)	South China	9.2	5.27	equatorial areas	Y	Fusiform	35
Schwagerinidae Dunbar et Henbest,1930	Schwag	Schwagerina Moeller,1877	Schwagerina subobsoletus var.okuboensis (Ozawa)	South China	3.61	1.33	equatorial areas	Y	Fusiform	35
Schwagerinidae Dunbar et Henbest,1930	Schwag	Schwagerina Moeller,1877	Schwagerina longipertica Chen,1956	South China	5.47	1.42	equatorial areas	Y	Fusiform	35
Schwagerinidae Dunbar et Henbest,1930	Schwag	Schwagerina Moeller,1877	Schwagerina longipertica Chen,1956	South China	5.47	1.42	equatorial areas	Y	Fusiform	35
Schwagerinidae Dunbar et Henbest,1930	Schwag	Schwagerina Moeller,1877	Schwagerina kwangchiensis Chen,1956	South China	6.15	1.54	equatorial areas	Y	Fusiform	35
Schwagerinidae Dunbar et Henbest,1930	Schwag	Schwagerina Moeller,1877	Schwagerina exilis (Schwager, 1883)	South China	5.41	2.01	equatorial areas	Y	Fusiform	35
Schwagerinidae Dunbar et Henbest,1930	Schwag	Schwagerina Moeller,1877	Schwagerina exilis (Schwager, 1883)	South China	5.41	2.01	equatorial areas	Y	Fusiform	35
Schwagerinidae Dunbar et Henbest,1930	Schwag	Schwagerina Moeller,1877	Schwagerina skinneri Chen,1956	South China	5.03	2.36	equatorial areas	Y	Fusiform	35
Schwagerinidae Dunbar et Henbest,1930	Schwag	Schwagerina Moeller,1877	Schwagerina suni Chen,1956	South China	6.6	2.39	equatorial areas	Y	Fusiform	35
Schwagerinidae Dunbar et Henbest,1930	Schwag	Schwagerina Moeller,1877	Schwagerina paralpina Chen,1956	South China	7.22	2.42	equatorial areas	Y	Fusiform	35
Schwagerinidae Dunbar et Henbest,1930	Schwag	Schwagerina Moeller,1877	Schwagerina tienchiaensis Chen,1956	South China	5.86	2.51	equatorial areas	Y	Fusiform	35
Schwagerinidae Dunbar et Henbest,1930	Schwag	Schwagerina Moeller,1877	Schwagerina hupehensis Chen,1956	South China	11.18	2.51	equatorial areas	Y	Fusiform	35
Schwagerinidae Dunbar et Henbest,1930	Schwag	Schwagerina Moeller,1877	Schwagerina longipertica Chen,1956	South China	9.53	2.81	equatorial areas	Y	Fusiform	35
Schwagerinidae Dunbar et Henbest,1930	Schwag	Schwagerina Moeller,1877	Schwagerina multialveola Chen,1956	South China	6.98	3.04	equatorial areas	Y	Fusiform	35
Schwagerinidae Dunbar et Henbest,1930	Schwag	Schwagerina Moeller,1877	Schwagerina suni Chen,1956	South China	6.98	3.04	equatorial areas	Y	Fusiform	35
Schwagerinidae Dunbar et Henbest,1930	Schwag	Schwagerina Moeller,1877	Schwagerina longitermina Chen,1956	South China	11.07	3.57	equatorial areas	Y	Fusiform	35
Neoschwagerinidae Dunbar et Condra,1927	Neo	Sumatrina Volz,1904	Sumatrina annae Volz,1904	South China	4.1	1.6	equatorial areas	Y	Fusiform	35
Neoschwagerinidae Dunbar et Condra,1927	Neo	Sumatrina Volz,1904	Sumatrina annae Volz,1904	South China	4.1	1.6	equatorial areas	Y	Fusiform	35
Neoschwagerinidae Dunbar et Condra,1927	Neo	Sumatrina Volz,1904	Sumatrina annae Volz,1904	South China	4.1	1.6	equatorial areas	Y	Fusiform	35
Neoschwagerinidae Dunbar et Condra,1927	Neo	Sumatrina Volz,1904	Sumatrina longissima Deprat,1914	South China	5.59	1.62	equatorial areas	Y	Fusiform	35
Verbeekinidae Staff et Wedekina,1910	Verb	Verbeekina Staff,1909	Verbeekina sphaera Ozawa,1927	South China	2.48	2.16	equatorial areas	Y	Fusiform	35
Verbeekinidae Staff et Wedekina,1910	Verb	Verbeekina Staff,1909	Verbeekina verbeeki (Geinitz,1876)	South China	2.48	2.16	equatorial areas	Y	Fusiform	35
Verbeekinidae Staff et Wedekina,1910	Verb	Verbeekina Staff,1909	Verbeekina verbeeki (Geinitz,1876)	South China	10.95	8.67	equatorial areas	Y	Fusiform	35
Verbeekinidae Staff et Wedekina,1910	Verb	Verbeekina Staff,1909	Verbeekina verbeeki (Geinitz,1876)	South China	10.95	8.67	equatorial areas	Y	Fusiform	35
Verbeekinidae Staff et Wedekina,1910	Verb	Verbeekina Staff,1909	Verbeekina verbeeki (Geinitz,1876)	South China	10.95	8.67	equatorial areas	Y	Fusiform	35
Neoschwagerinidae Dunbar et Condra,1927	Neo	Yabeina Deprat,1914	Yabeina inouyei Deprat,1914	South China	8.1	5.03	equatorial areas	Y	Fusiform	35
Schubertellidae Skinner,1931	Schu	Yangchienia Lee,1933	Yangchienia kwangsiensis Chen,1956	South China	1.43	0.89	equatorial areas	N	Fusiform	35
Neoschwagerinidae Dunbar et Condra,1927	Neo	Afghanella Thompson,1946	Afghanella schencki Thompson, 1946	Kunlun-Qadam Block	3.675	2	equatorial areas	Y	Fusiform	18	[4]
Neoschwagerinidae Dunbar et Condra,1927	Neo	Afghanella Thompson,1946	Afghanella megaspherica Sheng,1958	Kunlun-Qadam Block	3.15	2.2	equatorial areas	Y	Fusiform	18
Neoschwagerinidae Dunbar et Condra,1927	Neo	Afghanella Thompson,1946	Afghanella megaspherica Sheng,1958	Kunlun-Qadam Block	3.34	2.21	equatorial areas	Y	Fusiform	18
Neoschwagerinidae Dunbar et Condra,1927	Neo	Afghanella Thompson,1946	Afghanella schencki Thompson, 1946	Kunlun-Qadam Block	4.54	2.3	equatorial areas	Y	Fusiform	18
Neoschwagerinidae Dunbar et Condra,1927	Neo	Afghanella Thompson,1946	Afghanella megaspherica Sheng,1958	Kunlun-Qadam Block	4.2	2.36	equatorial areas	Y	Fusiform	18
Verbeekinidae Staff et Wedekina,1910	Verb	Armenina M.-Maclay,1955	Armenina crassispira (Chen,1956)	Kunlun-Qadam Block	2.467	2.33	equatorial areas	Y	Fusiform	18
Verbeekinidae Staff et Wedekina,1910	Verb	Armenina M.-Maclay,1955	Armenina crassispira (Chen,1956)	Kunlun-Qadam Block	3.593	3.82	equatorial areas	Y	Fusiform	18
Verbeekinidae Staff et Wedekina,1910	Verb	Armenina M.-Maclay,1955	Armenina crassispira (Chen,1956)	Kunlun-Qadam Block	4.94	5.32	equatorial areas	Y	Fusiform	18
Schubertellidae Skinner,1931	Schu	Dunbarula Ciry,1948	Dunbarula schubertellaeformis Sheng,1958	Kunlun-Qadam Block	1.16	0.42	equatorial areas	N	Fusiform	18
Schubertellidae Skinner,1931	Schu	Dunbarula Ciry,1948	Dunbarula schubertellaeformis Sheng,1958	Kunlun-Qadam Block	1.13	0.5	equatorial areas	N	Fusiform	18
Schubertellidae Skinner,1931	Schu	Dunbarula Ciry,1948	Dunbarula schubertellaeformis Sheng,1958	Kunlun-Qadam Block	1.207	0.517	equatorial areas	N	Fusiform	18
Schubertellidae Skinner,1931	Schu	Dunbarula Ciry,1948	Dunbarula schubertellaeformis Sheng,1958	Kunlun-Qadam Block	1.287	0.52	equatorial areas	N	Fusiform	18
Schubertellidae Skinner,1931	Schu	Dunbarula Ciry,1948	Dunbarula schubertellaeformis Sheng,1958	Kunlun-Qadam Block	1.667	0.557	equatorial areas	N	Fusiform	18
Staffellidae A.D.Miklukho-Maklay, 1949	Staff	Nankinella Lee,1933	Nankinella hunanensis (Chen,1956)	Kunlun-Qadam Block	1.16	2.847	equatorial areas	N	Lenticular	18
Neoschwagerinidae Dunbar et Condra,1927	Neo	Neoschwagerina Yabe,1903	Neoschwagerina hsinghaiana Sheng, 1958	Kunlun-Qadam Block	4.26	2.56	equatorial areas	Y	Fusiform	18
Neoschwagerinidae Dunbar et Condra,1927	Neo	Neoschwagerina Yabe,1903	Neoschwagerina hsinghaiana Sheng, 1958	Kunlun-Qadam Block	4.433	3.2	equatorial areas	Y	Fusiform	18
Neoschwagerinidae Dunbar et Condra,1927	Neo	Neoschwagerina Yabe,1903	Neoschwagerina hsinghaiana Sheng, 1958	Kunlun-Qadam Block	4.867	3.473	equatorial areas	Y	Fusiform	18
Neoschwagerinidae Dunbar et Condra,1927	Neo	Neoschwagerina Yabe,1903	Neoschwagerina cheni Sheng,1958	Kunlun-Qadam Block	4.18	3.5	equatorial areas	Y	Fusiform	18
Neoschwagerinidae Dunbar et Condra,1927	Neo	Neoschwagerina Yabe,1903	Neoschwagerina cheni Sheng,1958	Kunlun-Qadam Block	5.16	4.293	equatorial areas	Y	Fusiform	18
Neoschwagerinidae Dunbar et Condra,1927	Neo	Neoschwagerina Yabe,1903	Neoschwagerina hsinghaiana Sheng, 1958	Kunlun-Qadam Block	7.01	4.4	equatorial areas	Y	Fusiform	18
Neoschwagerinidae Dunbar et Condra,1927	Neo	Neoschwagerina Yabe,1903	Neoschwagerina cheni Sheng,1958	Kunlun-Qadam Block	5.81	4.74	equatorial areas	Y	Fusiform	18
Ozawainellidae Thompson et Foster,1937	Oza	Ozawainella Thompson,1935	Ozawainella turgida Sheng, 1958	Kunlun-Qadam Block	1.27	2.4	equatorial areas	N	Lenticular	18
Verbeekinidae Staff et Wedekina,1910	Verb	Pseudodoliolina Yabe et Hanzawa,1932	Pseudodoliolina chinghaiensis Sheng,1958	Kunlun-Qadam Block	4.187	2.253	equatorial areas	Y	Fusiform	18
Verbeekinidae Staff et Wedekina,1910	Verb	Pseudodoliolina Yabe et Hanzawa,1932	Pseudodoliolina chinghaiensis Sheng,1958	Kunlun-Qadam Block	5.08	2.7	equatorial areas	Y	Fusiform	18
Schubertellidae Skinner,1931	Schu	Schubertella Staff et Wedekind,1910	Schubertella pseudosimplex Sheng,1958	Kunlun-Qadam Block	0.66	0.43	equatorial areas	N	Fusiform	18
Schwagerinidae Dunbar et Henbest,1930	Schwag	Schwagerina Moeller,1877	Schwagerina crassialveola Sheng,1958	Kunlun-Qadam Block	3.7	2.74	equatorial areas	Y	Fusiform	18
Schwagerinidae Dunbar et Henbest,1930	Schwag	Schwagerina Moeller,1877	Schwagerina crassialveola Sheng,1958	Kunlun-Qadam Block	4.34	2.76	equatorial areas	Y	Fusiform	18
Neoschwagerinidae Dunbar et Condra,1927	Neo	Sumatrina Volz,1904	Sumatrina fusiformis Sheng,1958	Kunlun-Qadam Block	4.967	1.587	equatorial areas	Y	Fusiform	18
Neoschwagerinidae Dunbar et Condra,1927	Neo	Sumatrina Volz,1904	Sumatrina fusiformis Sheng,1958	Kunlun-Qadam Block	5.647	1.927	equatorial areas	Y	Fusiform	18
Neoschwagerinidae Dunbar et Condra,1927	Neo	Sumatrina Volz,1904	Sumatrina fusiformis Sheng,1958	Kunlun-Qadam Block	6.68	2	equatorial areas	Y	Fusiform	18
Verbeekinidae Staff et Wedekina,1910	Verb	Verbeekina Staff,1909	Verbeekina heimi Thompson et Foster,1937	Kunlun-Qadam Block	4.6	4.61	equatorial areas	Y	Fusiform	18
Verbeekinidae Staff et Wedekina,1910	Verb	Verbeekina Staff,1909	Verbeekina heimi Thompson et Foster,1937	Kunlun-Qadam Block	5.16	5.16	equatorial areas	Y	Fusiform	18
Verbeekinidae Staff et Wedekina,1910	Verb	Verbeekina Staff,1909	Verbeekina heimi Thompson et Foster,1937	Kunlun-Qadam Block	6.28	6.62	equatorial areas	Y	Fusiform	18
Ozawainellidae Thompson et Foster,1937	Oza	Chenella M.-Maclay,1959	Chenella changanchiaoensis (Sheng and Wang,1962)	South China	0.5	1.1	equatorial areas	N	Lenticular	35	[5]
Ozawainellidae Thompson et Foster,1937	Oza	Chenella M.-Maclay,1959	Chenella changanchiaoensis (Sheng and Wang,1962)	South China	0.525	1.42	equatorial areas	N	Lenticular	35
Schubertellidae Skinner,1931	Schu	Codonofusiella Dunbar et Skinner,1937	Codonofusiella wusiana Sheng et Wang,1962	South China	0.84	0.4	equatorial areas	N	Fusiform	35
Verbeekinidae Staff et Wedekina,1910	Verb	Kahlerina Kochansky-Devidie et Ramovs,1955	Kahlerina sinensis Sheng,1963	South China	1.54	2	equatorial areas	Y	Fusiform	35
Verbeekinidae Staff et Wedekina,1910	Verb	Metadoliolina Ishii et Nogami,1961	Metadoliolina compacta (Chen,1956)	South China	4.18	1.38	equatorial areas	Y	Fusiform	35
Verbeekinidae Staff et Wedekina,1910	Verb	Metadoliolina Ishii et Nogami,1961	Metadoliolina lepida (Schwager,1883)	South China	4.18	2.01	equatorial areas	Y	Fusiform	35
Verbeekinidae Staff et Wedekina,1910	Verb	Metadoliolina Ishii et Nogami,1961	Metadoliolina compacta (Chen,1956)	South China	5.55	2.01	equatorial areas	Y	Fusiform	35
Verbeekinidae Staff et Wedekina,1910	Verb	Metadoliolina Ishii et Nogami,1961	Metadoliolina compacta (Chen,1956)	South China	7.9	2.62	equatorial areas	Y	Fusiform	35
Verbeekinidae Staff et Wedekina,1910	Verb	Metadoliolina Ishii et Nogami,1961	Metadoliolina ellipsoidalis (Schwager,1883)	South China	5.4	3.4	equatorial areas	Y	Fusiform	35
Verbeekinidae Staff et Wedekina,1910	Verb	Metadoliolina Ishii et Nogami,1961	Metadoliolina multivoluta (Sheng,1963)	South China	11.24	6.84	equatorial areas	Y	Fusiform	35
Schwagerinidae Dunbar et Henbest,1930	Schwag	Schwagerina Moeller,1877	Schwagerina longipertica Chen,1956	South China	7.22	2.14	equatorial areas	Y	Fusiform	35
Schwagerinidae Dunbar et Henbest,1930	Schwag	Schwagerina Moeller,1877	Schwagerina longipertica Chen,1956	South China	9.16	2.55	equatorial areas	Y	Fusiform	35
Ozawainellidae Thompson et Foster,1937	Oza	Chenella M.-Maclay,1959	Chenella changanchiaoensis (Sheng and Wang,1962)	South China	0.233	0.433	equatorial areas	N	Lenticular	35	[6]
Ozawainellidae Thompson et Foster,1937	Oza	Chenella M.-Maclay,1959	Chenella changanchiaoensis (Sheng and Wang,1962)	South China	0.265	0.515	equatorial areas	N	Lenticular	35
Ozawainellidae Thompson et Foster,1937	Oza	Chenella M.-Maclay,1959	Chenella changanchiaoensis (Sheng and Wang,1962)	South China	0.425	0.603	equatorial areas	N	Lenticular	35
Ozawainellidae Thompson et Foster,1937	Oza	Chenella M.-Maclay,1959	Chenella changanchiaoensis (Sheng and Wang,1962)	South China	0.28	0.76	equatorial areas	N	Lenticular	35
Schubertellidae Skinner,1931	Schu	Codonofusiella Dunbar et Skinner,1937	Codonofusiella paradoxica Dunbar et Skinner,1937	South China	0.58	0.24	equatorial areas	N	Fusiform	35
Schubertellidae Skinner,1931	Schu	Codonofusiella Dunbar et Skinner,1937	Codonofusiella schubertelloides Sheng,1956	South China	0.43	0.25	equatorial areas	N	Fusiform	35
Schubertellidae Skinner,1931	Schu	Codonofusiella Dunbar et Skinner,1937	Codonofusiella schubertelloides Sheng,1956	South China	0.478	0.305	equatorial areas	N	Fusiform	35
Schubertellidae Skinner,1931	Schu	Codonofusiella Dunbar et Skinner,1937	Codonofusiella schubertelloides Sheng,1956	South China	0.708	0.373	equatorial areas	N	Fusiform	35
Schubertellidae Skinner,1931	Schu	Codonofusiella Dunbar et Skinner,1937	Codonofusiella schubertelloides Sheng,1956	South China	0.78	0.44	equatorial areas	N	Fusiform	35
Schwagerinidae Dunbar et Henbest,1930	Schwag	Eopolydiexodina Wilde,1975	Eopolydiexodina chekiangensis Sheng, 1962	South China	13.56	2.48	equatorial areas	Y	Fusiform	35
Schwagerinidae Dunbar et Henbest,1930	Schwag	Eopolydiexodina Wilde,1975	Eopolydiexodina chekiangensis Sheng, 1962	South China	13.3	2.5	equatorial areas	Y	Fusiform	35
Schwagerinidae Dunbar et Henbest,1930	Schwag	Eopolydiexodina Wilde,1975	Eopolydiexodina chekiangensis Sheng, 1962	South China	14.21	2.55	equatorial areas	Y	Fusiform	35
Schwagerinidae Dunbar et Henbest,1930	Schwag	Eopolydiexodina Wilde,1975	Eopolydiexodina chekiangensis Sheng, 1962	South China	9.8	2.64	equatorial areas	Y	Fusiform	35
Schwagerinidae Dunbar et Henbest,1930	Schwag	Eopolydiexodina Wilde,1975	Eopolydiexodina chekiangensis Sheng, 1962	South China	11.92	2.8	equatorial areas	Y	Fusiform	35
Schwagerinidae Dunbar et Henbest,1930	Schwag	Eopolydiexodina Wilde,1975	Eopolydiexodina chekiangensis Sheng, 1962	South China	14.52	2.93	equatorial areas	Y	Fusiform	35
Verbeekinidae Staff et Wedekina,1910	Verb	Kahlerina Kochansky-Devidie et Ramovs,1955	Kahlerina sinensis Sheng,1963	South China	0.98	1.015	equatorial areas	Y	Fusiform	35
Verbeekinidae Staff et Wedekina,1910	Verb	Kahlerina Kochansky-Devidie et Ramovs,1955	Kahlerina sinensis Sheng,1963	South China	0.955	1.295	equatorial areas	Y	Fusiform	35
Verbeekinidae Staff et Wedekina,1910	Verb	Kahlerina Kochansky-Devidie et Ramovs,1955	Kahlerina sinensis Sheng,1963	South China	1.135	1.351	equatorial areas	Y	Fusiform	35
Verbeekinidae Staff et Wedekina,1910	Verb	Kahlerina Kochansky-Devidie et Ramovs,1955	Kahlerina sinensis Sheng,1963	South China	1.58	2.2	equatorial areas	Y	Fusiform	35
Schubertellidae Skinner,1931	Schu	Minojapanella Fujimoto et Kanuma,1953	Minojapanella minuta Sheng,1962	South China	1.23	0.278	equatorial areas	N	Fusiform	35
Schubertellidae Skinner,1931	Schu	Minojapanella Fujimoto et Kanuma,1953	Minojapanella minuta Sheng,1962	South China	1.6	0.32	equatorial areas	N	Fusiform	35
Schwagerinidae Dunbar et Henbest,1930	Schwag	Parafusulina Dunbar et Skinner,1931	Parafusulina tungluensis (Sheng,1962)	South China	10.26	2.24	equatorial areas	Y	Fusiform	35
Schwagerinidae Dunbar et Henbest,1930	Schwag	Parafusulina Dunbar et Skinner,1931	Parafusulina tungluensis (Sheng,1962)	South China	12.24	2.4	equatorial areas	Y	Fusiform	35
Schwagerinidae Dunbar et Henbest,1930	Schwag	Chusenella Hsu,1942	Chusenella cambodgiensis (Gubler,1935)	Qamdo Block	11.5	4.06	equatorial areas	Y	Fusiform	26	[7]
Schubertellidae Skinner,1931	Schu	Yangchienia Lee,1933	Yangchienia haydeni Thompson,1946	Qamdo Block	2.32	1.74	equatorial areas	N	Fusiform	26
Schubertellidae Skinner,1931	Schu	Yangchienia Lee,1933	Yangchienia haydeni Thompson,1946	Qamdo Block	2.62	1.74	equatorial areas	N	Fusiform	26
Schwagerinidae Dunbar et Henbest,1930	Schwag	Chusenella Hsu,1942	Chusenella pseudocrassa (Kanmera,1954)	Akiyoshi Terrane	8.6	4	equatorial areas	Y	Fusiform	1	[8]
Schubertellidae Skinner,1931	Schu	Codonofusiella Dunbar et Skinner,1937	Codonofusiella cuniculata Kanmera,1954	Akiyoshi Terrane	2	0.62	equatorial areas	N	Fusiform	1
Neoschwagerinidae Dunbar et Condra,1927	Neo	Lepidolina Lee,1933	Lepidolina multiseptata (Deprat,1912)	Akiyoshi Terrane	4.93	2.94	equatorial areas	Y	Fusiform	1
Neoschwagerinidae Dunbar et Condra,1927	Neo	Lepidolina Lee,1933	Lepidolina multiseptata (Deprat,1912)	Akiyoshi Terrane	4.54	2.95	equatorial areas	Y	Fusiform	1
Neoschwagerinidae Dunbar et Condra,1927	Neo	Lepidolina Lee,1933	Lepidolina multiseptata (Deprat,1912)	Akiyoshi Terrane	7.5	4.5	equatorial areas	Y	Fusiform	1
Neoschwagerinidae Dunbar et Condra,1927	Neo	Lepidolina Lee,1933	Lepidolina kumaensis Kanmera,1954	Akiyoshi Terrane	5.54	1.95	equatorial areas	Y	Fusiform	1
Neoschwagerinidae Dunbar et Condra,1927	Neo	Lepidolina Lee,1933	Lepidolina kumaensis Kanmera,1954	Akiyoshi Terrane	4.49	2.17	equatorial areas	Y	Fusiform	1
Neoschwagerinidae Dunbar et Condra,1927	Neo	Lepidolina Lee,1933	Lepidolina kumaensis Kanmera,1954	Akiyoshi Terrane	6.82	2.38	equatorial areas	Y	Fusiform	1
Neoschwagerinidae Dunbar et Condra,1927	Neo	Lepidolina Lee,1933	Lepidolina kumaensis Kanmera,1954	Akiyoshi Terrane	6.73	2.49	equatorial areas	Y	Fusiform	1
Neoschwagerinidae Dunbar et Condra,1927	Neo	Lepidolina Lee,1933	Lepidolina kumaensis Kanmera,1954	Akiyoshi Terrane	8.8	2.5	equatorial areas	Y	Fusiform	1
Neoschwagerinidae Dunbar et Condra,1927	Neo	Lepidolina Lee,1933	Lepidolina kumaensis Kanmera,1954	Akiyoshi Terrane	5.21	2.92	equatorial areas	Y	Fusiform	1
Neoschwagerinidae Dunbar et Condra,1927	Neo	Lepidolina Lee,1933	Lepidolina kumaensis Kanmera,1954	Akiyoshi Terrane	6.69	2.94	equatorial areas	Y	Fusiform	1
Neoschwagerinidae Dunbar et Condra,1927	Neo	Lepidolina Lee,1933	Lepidolina kumaensis Kanmera,1954	Akiyoshi Terrane	7.14	2.96	equatorial areas	Y	Fusiform	1
Neoschwagerinidae Dunbar et Condra,1927	Neo	Lepidolina Lee,1933	Lepidolina kumaensis Kanmera,1954	Akiyoshi Terrane	6.86	3.17	equatorial areas	Y	Fusiform	1
Neoschwagerinidae Dunbar et Condra,1927	Neo	Lepidolina Lee,1933	Lepidolina kumaensis Kanmera,1954	Akiyoshi Terrane	9.2	3.17	equatorial areas	Y	Fusiform	1
Neoschwagerinidae Dunbar et Condra,1927	Neo	Lepidolina Lee,1933	Lepidolina kumaensis Kanmera,1954	Akiyoshi Terrane	8.3	3.2	equatorial areas	Y	Fusiform	1
Neoschwagerinidae Dunbar et Condra,1927	Neo	Lepidolina Lee,1933	Lepidolina kumaensis Kanmera,1954	Akiyoshi Terrane	11	3.2	equatorial areas	Y	Fusiform	1
Schwagerinidae Dunbar et Henbest,1930	Schwag	Parafusulina Dunbar et Skinner,1931	Parafusulina bakeki Dunbar and Skinner, 1937	Akiyoshi Terrane	11.21	2.46	equatorial areas	Y	Fusiform	1
Verbeekinidae Staff et Wedekina,1910	Verb	Pseudodoliolina Yabe et Hanzawa,1932	Pseudodoliolina gravitesta Kanmera,1954	Akiyoshi Terrane	6.78	3.76	equatorial areas	Y	Fusiform	1
Verbeekinidae Staff et Wedekina,1910	Verb	Pseudodoliolina Yabe et Hanzawa,1932	Pseudodoliolina gravitesta Kanmera,1954	Akiyoshi Terrane	9.75	4	equatorial areas	Y	Fusiform	1
Verbeekinidae Staff et Wedekina,1910	Verb	Pseudodoliolina Yabe et Hanzawa,1932	Pseudodoliolina gravitesta Kanmera,1954	Akiyoshi Terrane	10.5	4.1	equatorial areas	Y	Fusiform	1
Verbeekinidae Staff et Wedekina,1910	Verb	Pseudodoliolina Yabe et Hanzawa,1932	Pseudodoliolina gravitesta Kanmera,1954	Akiyoshi Terrane	6.36	4.19	equatorial areas	Y	Fusiform	1
Schwagerinidae Dunbar et Henbest,1930	Schwag	Schwagerina Moeller,1877	Schwagerina acris Thompson et Wheeler,1950	Akiyoshi Terrane	5.42	2.07	equatorial areas	Y	Fusiform	1
Schwagerinidae Dunbar et Henbest,1930	Schwag	Schwagerina Moeller,1877	Schwagerina acris Thompson et Wheeler,1950	Akiyoshi Terrane	7.8	2.2	equatorial areas	Y	Fusiform	1
Schwagerinidae Dunbar et Henbest,1930	Schwag	Schwagerina Moeller,1877	Schwagerina acris Thompson et Wheeler,1950	Akiyoshi Terrane	5.23	2.35	equatorial areas	Y	Fusiform	1
Schwagerinidae Dunbar et Henbest,1930	Schwag	Schwagerina Moeller,1877	Schwagerina acris Thompson et Wheeler,1950	Akiyoshi Terrane	6.82	2.77	equatorial areas	Y	Fusiform	1
Verbeekinidae Staff et Wedekina,1910	Verb	Verbeekina Staff,1909	Verbeekina verbeeki (Geinitz,1876)	Akiyoshi Terrane	4.68	3.343	equatorial areas	Y	Fusiform	1
Neoschwagerinidae Dunbar et Condra,1927	Neo	Yabeina Deprat,1914	Yabeina gubleri Kanmera,1954	Akiyoshi Terrane	8.41	3.01	equatorial areas	Y	Fusiform	1
Neoschwagerinidae Dunbar et Condra,1927	Neo	Yabeina Deprat,1914	Yabeina gubleri Kanmera,1954	Akiyoshi Terrane	7.66	3.23	equatorial areas	Y	Fusiform	1
Neoschwagerinidae Dunbar et Condra,1927	Neo	Yabeina Deprat,1914	Yabeina gubleri Kanmera,1954	Akiyoshi Terrane	5.52	3.63	equatorial areas	Y	Fusiform	1
Neoschwagerinidae Dunbar et Condra,1927	Neo	Yabeina Deprat,1914	Yabeina gubleri Kanmera,1954	Akiyoshi Terrane	7.5	3.84	equatorial areas	Y	Fusiform	1
Neoschwagerinidae Dunbar et Condra,1927	Neo	Yabeina Deprat,1914	Yabeina columbiana (Dawson,1879)	Akiyoshi Terrane	7.27	4.25	equatorial areas	Y	Fusiform	1
Neoschwagerinidae Dunbar et Condra,1927	Neo	Yabeina Deprat,1914	Yabeina gubleri Kanmera,1954	Akiyoshi Terrane	10	4.5	equatorial areas	Y	Fusiform	1
Neoschwagerinidae Dunbar et Condra,1927	Neo	Yabeina Deprat,1914	Yabeina columbiana (Dawson,1879)	Akiyoshi Terrane	8.22	4.7	equatorial areas	Y	Fusiform	1
Neoschwagerinidae Dunbar et Condra,1927	Neo	Yabeina Deprat,1914	Yabeina columbiana (Dawson,1879)	Akiyoshi Terrane	9.5	6	equatorial areas	Y	Fusiform	1
Neoschwagerinidae Dunbar et Condra,1927	Neo	Yabeina Deprat,1914	Yabeina gubleri Kanmera,1954	Akiyoshi Terrane	12.6	6.01	equatorial areas	Y	Fusiform	1
Schwagerinidae Dunbar et Henbest,1930	Schwag	Parafusulina Dunbar et Skinner,1931	Parafusulina gigantea (Deprat,1913)	Indochina Block	9.95	2.95	equatorial areas	Y	Fusiform	13	[9]
Schwagerinidae Dunbar et Henbest,1930	Schwag	Parafusulina Dunbar et Skinner,1931	Parafusulina gigantea (Deprat,1913)	Indochina Block	8.42	3.27	equatorial areas	Y	Fusiform	13
Schwagerinidae Dunbar et Henbest,1930	Schwag	Parafusulina Dunbar et Skinner,1931	Parafusulina kaerimizensis (Ozawa, 1925)	Indochina Block	12.11	3.38	equatorial areas	Y	Fusiform	13
Schwagerinidae Dunbar et Henbest,1930	Schwag	Parafusulina Dunbar et Skinner,1931	Parafusulina japonica (Gumbel, 1883)	Indochina Block	11	3.5	equatorial areas	Y	Fusiform	13
Schwagerinidae Dunbar et Henbest,1930	Schwag	Parafusulina Dunbar et Skinner,1931	Parafusulina kaerimizensis (Ozawa, 1925)	Indochina Block	11.5	4	equatorial areas	Y	Fusiform	13
Schwagerinidae Dunbar et Henbest,1930	Schwag	Parafusulina Dunbar et Skinner,1931	Parafusulina kaerimizensis (Ozawa, 1925)	Indochina Block	12.9	4.5	equatorial areas	Y	Fusiform	13
Schwagerinidae Dunbar et Henbest,1930	Schwag	Parafusulina Dunbar et Skinner,1931	Parafusulina gigantea (Deprat,1913)	Indochina Block	15.3	5.3	equatorial areas	Y	Fusiform	13
Schwagerinidae Dunbar et Henbest,1930	Schwag	Skinnerella Coogan,1960	Skinnerella crassa (Deprat, 1913)	Indochina Block	6.26	2.92	equatorial areas	Y	Fusiform	13
Schwagerinidae Dunbar et Henbest,1930	Schwag	Skinnerella Coogan,1960	Skinnerella crassa (Deprat, 1913)	Indochina Block	6.139	2.954	equatorial areas	Y	Fusiform	13
Schwagerinidae Dunbar et Henbest,1930	Schwag	Monodiexodina Sosnina,1956	Monodiexodina kumensis Kanmera,1963	Akiyoshi Terrane	14.84	2.15	equatorial areas	Y	Fusiform	1	[10]
Schwagerinidae Dunbar et Henbest,1930	Schwag	Monodiexodina Sosnina,1956	Monodiexodina kumensis Kanmera,1963	Akiyoshi Terrane	16	2.2	equatorial areas	Y	Fusiform	1
Schwagerinidae Dunbar et Henbest,1930	Schwag	Nagatoella Thompson,1936	Nagatoella minatoi Kanmera et Mikami,1965	Akiyoshi Terrane	2.87	1.34	equatorial areas	Y	Fusiform	1
Schwagerinidae Dunbar et Henbest,1930	Schwag	Nagatoella Thompson,1936	Nagatoella minatoi Kanmera et Mikami,1965	Akiyoshi Terrane	3.73	2	equatorial areas	Y	Fusiform	1
Schwagerinidae Dunbar et Henbest,1930	Schwag	Nagatoella Thompson,1936	Nagatoella minatoi Kanmera et Mikami,1965	Akiyoshi Terrane	3.08	3.08	equatorial areas	Y	Fusiform	1
Staffellidae A.D.Miklukho-Maklay, 1949	Staff	Nankinella Lee,1933	Nankinella kozakiensis Kanmera,1963	Akiyoshi Terrane	0.628	1.084	equatorial areas	N	Lenticular	1
Staffellidae A.D.Miklukho-Maklay, 1949	Staff	Nankinella Lee,1933	Nankinella kozakiensis Kanmera,1963	Akiyoshi Terrane	1.11	1.88	equatorial areas	N	Lenticular	1
Staffellidae A.D.Miklukho-Maklay, 1949	Staff	Nankinella Lee,1933	Nankinella kozakiensis Kanmera,1963	Akiyoshi Terrane	1.144	1.88	equatorial areas	N	Lenticular	1
Staffellidae A.D.Miklukho-Maklay, 1949	Staff	Nankinella Lee,1933	Nankinella kozakiensis Kanmera,1963	Akiyoshi Terrane	0.964	2.152	equatorial areas	N	Lenticular	1
Staffellidae A.D.Miklukho-Maklay, 1949	Staff	Nankinella Lee,1933	Nankinella kozakiensis Kanmera,1963	Akiyoshi Terrane	0.992	2.156	equatorial areas	N	Lenticular	1
Staffellidae A.D.Miklukho-Maklay, 1949	Staff	Nankinella Lee,1933	Nankinella kozakiensis Kanmera,1963	Akiyoshi Terrane	1.4	2.5	equatorial areas	N	Lenticular	1
Schubertellidae Skinner,1931	Schu	Neofusulinella Deprat,1912	Neofusulinella giraudi Deprat,1915	Akiyoshi Terrane	1.35	0.62	equatorial areas	N	Fusiform	1
Neoschwagerinidae Dunbar et Condra,1927	Neo	Neoschwagerina Yabe,1903	Neoschwagerina simplex Ozawa,1927	Akiyoshi Terrane	3.29	3.14	equatorial areas	Y	Fusiform	1
Neoschwagerinidae Dunbar et Condra,1927	Neo	Neoschwagerina Yabe,1903	Neoschwagerina simplex Ozawa,1927	Akiyoshi Terrane	3.3	3.17	equatorial areas	Y	Fusiform	1
Neoschwagerinidae Dunbar et Condra,1927	Neo	Neoschwagerina Yabe,1903	Neoschwagerina simplex Ozawa,1927	Akiyoshi Terrane	3.44	3.37	equatorial areas	Y	Fusiform	1
Schwagerinidae Dunbar et Henbest,1930	Schwag	Parafusulina Dunbar et Skinner,1931	Parafusulina postkraffti Leven, 1967	Akiyoshi Terrane	5.12	1.72	equatorial areas	Y	Fusiform	1
Schwagerinidae Dunbar et Henbest,1930	Schwag	Parafusulina Dunbar et Skinner,1931	Parafusulina postkraffti Leven, 1967	Akiyoshi Terrane	6.11	2.18	equatorial areas	Y	Fusiform	1
Schwagerinidae Dunbar et Henbest,1930	Schwag	Parafusulina Dunbar et Skinner,1931	Parafusulina postkraffti Leven, 1967	Akiyoshi Terrane	8	2.2	equatorial areas	Y	Fusiform	1
Schwagerinidae Dunbar et Henbest,1930	Schwag	Parafusulina Dunbar et Skinner,1931	Parafusulina kaerimizensis (Ozawa, 1925)	Akiyoshi Terrane	11.64	2.79	equatorial areas	Y	Fusiform	1
Schwagerinidae Dunbar et Henbest,1930	Schwag	Parafusulina Dunbar et Skinner,1931	Parafusulina kaerimizensis (Ozawa, 1925)	Akiyoshi Terrane	14	2.8	equatorial areas	Y	Fusiform	1
Schwagerinidae Dunbar et Henbest,1930	Schwag	Parafusulina Dunbar et Skinner,1931	Parafusulina gruperaensis (Thompson et Miller,1945)	Akiyoshi Terrane	5.57	2.88	equatorial areas	Y	Fusiform	1
Schwagerinidae Dunbar et Henbest,1930	Schwag	Parafusulina Dunbar et Skinner,1931	Parafusulina kaerimizensis (Ozawa, 1925)	Akiyoshi Terrane	13.7	2.99	equatorial areas	Y	Fusiform	1
Schwagerinidae Dunbar et Henbest,1930	Schwag	Parafusulina Dunbar et Skinner,1931	Parafusulina sapperi (Staff,1912)	Akiyoshi Terrane	11.65	3.21	equatorial areas	Y	Fusiform	1
Schwagerinidae Dunbar et Henbest,1930	Schwag	Parafusulina Dunbar et Skinner,1931	Parafusulina gruperaensis (Thompson et Miller,1945)	Akiyoshi Terrane	8.06	3.26	equatorial areas	Y	Fusiform	1
Schwagerinidae Dunbar et Henbest,1930	Schwag	Parafusulina Dunbar et Skinner,1931	Parafusulina nakamigawai Morikawa and Horiguchi,1956	Akiyoshi Terrane	12	3.42	equatorial areas	Y	Fusiform	1
Schwagerinidae Dunbar et Henbest,1930	Schwag	Parafusulina Dunbar et Skinner,1931	Parafusulina nakamigawai Morikawa and Horiguchi,1956	Akiyoshi Terrane	14.7	3.46	equatorial areas	Y	Fusiform	1
Schwagerinidae Dunbar et Henbest,1930	Schwag	Parafusulina Dunbar et Skinner,1931	Parafusulina sapperi (Staff,1912)	Akiyoshi Terrane	13.44	3.56	equatorial areas	Y	Fusiform	1
Schwagerinidae Dunbar et Henbest,1930	Schwag	Parafusulina Dunbar et Skinner,1931	Parafusulina nakamigawai Morikawa and Horiguchi,1956	Akiyoshi Terrane	13.4	3.61	equatorial areas	Y	Fusiform	1
Schwagerinidae Dunbar et Henbest,1930	Schwag	Parafusulina Dunbar et Skinner,1931	Parafusulina yabei Hanzawa, 1942	Akiyoshi Terrane	9.63	3.65	equatorial areas	Y	Fusiform	1
Schwagerinidae Dunbar et Henbest,1930	Schwag	Parafusulina Dunbar et Skinner,1931	Parafusulina gruperaensis (Thompson et Miller,1945)	Akiyoshi Terrane	7.53	3.71	equatorial areas	Y	Fusiform	1
Schwagerinidae Dunbar et Henbest,1930	Schwag	Parafusulina Dunbar et Skinner,1931	Parafusulina nakamigawai Morikawa and Horiguchi,1956	Akiyoshi Terrane	14.98	3.73	equatorial areas	Y	Fusiform	1
Schwagerinidae Dunbar et Henbest,1930	Schwag	Parafusulina Dunbar et Skinner,1931	Parafusulina yabei Hanzawa, 1942	Akiyoshi Terrane	9.88	3.79	equatorial areas	Y	Fusiform	1
Schwagerinidae Dunbar et Henbest,1930	Schwag	Parafusulina Dunbar et Skinner,1931	Parafusulina nakamigawai Morikawa and Horiguchi,1956	Akiyoshi Terrane	15	3.8	equatorial areas	Y	Fusiform	1
Schwagerinidae Dunbar et Henbest,1930	Schwag	Parafusulina Dunbar et Skinner,1931	Parafusulina sapperi (Staff,1912)	Akiyoshi Terrane	13.5	4	equatorial areas	Y	Fusiform	1
Schwagerinidae Dunbar et Henbest,1930	Schwag	Parafusulina Dunbar et Skinner,1931	Parafusulina yabei Hanzawa, 1942	Akiyoshi Terrane	12.21	4.52	equatorial areas	Y	Fusiform	1
Schwagerinidae Dunbar et Henbest,1930	Schwag	Parafusulina Dunbar et Skinner,1931	Parafusulina kaerimizensis (Ozawa, 1925)	Akiyoshi Terrane	17	4.7	equatorial areas	Y	Fusiform	1
Staffellidae A.D.Miklukho-Maklay, 1949	Staff	Sphaerulina Lee,1933	Sphaerulina crassispira Lee,1933	Akiyoshi Terrane	1.56	1.84	equatorial areas	N	Lenticular	1
Staffellidae A.D.Miklukho-Maklay, 1949	Staff	Sphaerulina Lee,1933	Sphaerulina crassispira Lee,1933	Akiyoshi Terrane	1.72	2.05	equatorial areas	N	Lenticular	1
Staffellidae A.D.Miklukho-Maklay, 1949	Staff	Sphaerulina Lee,1933	Sphaerulina crassispira japonica Kanmera,1963	Akiyoshi Terrane	2.09	2.18	equatorial areas	N	Lenticular	1
Staffellidae A.D.Miklukho-Maklay, 1949	Staff	Sphaerulina Lee,1933	Sphaerulina crassispira japonica Kanmera,1963	Akiyoshi Terrane	1.41	2.22	equatorial areas	N	Lenticular	1
Staffellidae A.D.Miklukho-Maklay, 1949	Staff	Sphaerulina Lee,1933	Sphaerulina crassispira Lee,1933	Akiyoshi Terrane	2.01	2.25	equatorial areas	N	Lenticular	1
Staffellidae A.D.Miklukho-Maklay, 1949	Staff	Sphaerulina Lee,1933	Sphaerulina crassispira japonica Kanmera,1963	Akiyoshi Terrane	1.94	2.35	equatorial areas	N	Lenticular	1
Staffellidae A.D.Miklukho-Maklay, 1949	Staff	Sphaerulina Lee,1933	Sphaerulina crassispira japonica Kanmera,1963	Akiyoshi Terrane	2.06	2.42	equatorial areas	N	Lenticular	1
Staffellidae A.D.Miklukho-Maklay, 1949	Staff	Sphaerulina Lee,1933	Sphaerulina crassispira Lee,1933	Akiyoshi Terrane	1.97	2.46	equatorial areas	N	Lenticular	1
Staffellidae A.D.Miklukho-Maklay, 1949	Staff	Sphaerulina Lee,1933	Sphaerulina crassispira japonica Kanmera,1963	Akiyoshi Terrane	2.08	2.47	equatorial areas	N	Lenticular	1
Staffellidae A.D.Miklukho-Maklay, 1949	Staff	Sphaerulina Lee,1933	Sphaerulina crassispira Lee,1933	Akiyoshi Terrane	2.26	2.65	equatorial areas	N	Lenticular	1
Staffellidae A.D.Miklukho-Maklay, 1949	Staff	Sphaerulina Lee,1933	Sphaerulina crassispira japonica Kanmera,1963	Akiyoshi Terrane	2.23	2.79	equatorial areas	N	Lenticular	1
Staffellidae A.D.Miklukho-Maklay, 1949	Staff	Sphaerulina Lee,1933	Sphaerulina crassispira japonica Kanmera,1963	Akiyoshi Terrane	2.2	2.8	equatorial areas	N	Lenticular	1
Schubertellidae Skinner,1931	Schu	Toriyamaia Kanmera,1956	Toriyamaia laxiseptata Kanmera,1956	Akiyoshi Terrane	1.572	0.704	equatorial areas	N	Fusiform	1
Schubertellidae Skinner,1931	Schu	Toriyamaia Kanmera,1956	Toriyamaia laxiseptata Kanmera,1956	Akiyoshi Terrane	1.82	0.84	equatorial areas	N	Fusiform	1
Schubertellidae Skinner,1931	Schu	Toriyamaia Kanmera,1956	Toriyamaia laxiseptata Kanmera,1956	Akiyoshi Terrane	2.06	0.936	equatorial areas	N	Fusiform	1
Schubertellidae Skinner,1931	Schu	Toriyamaia Kanmera,1956	Toriyamaia laxiseptata Kanmera,1956	Akiyoshi Terrane	2.276	1.08	equatorial areas	N	Fusiform	1
Verbeekinidae Staff et Wedekina,1910	Verb	Verbeekina Staff,1909	Verbeekina verbeeki (Geinitz,1876)	Akiyoshi Terrane	1.88	1.76	equatorial areas	Y	Fusiform	1
Verbeekinidae Staff et Wedekina,1910	Verb	Verbeekina Staff,1909	Verbeekina sphaera Ozawa,1927	Akiyoshi Terrane	2.42	2.17	equatorial areas	Y	Fusiform	1
Verbeekinidae Staff et Wedekina,1910	Verb	Verbeekina Staff,1909	Verbeekina sphaera Ozawa,1927	Akiyoshi Terrane	3.15	2.87	equatorial areas	Y	Fusiform	1
Verbeekinidae Staff et Wedekina,1910	Verb	Verbeekina Staff,1909	Verbeekina sphaera Ozawa,1927	Akiyoshi Terrane	4.1	3.44	equatorial areas	Y	Fusiform	1
Verbeekinidae Staff et Wedekina,1910	Verb	Verbeekina Staff,1909	Verbeekina sphaera Ozawa,1927	Akiyoshi Terrane	4.14	3.61	equatorial areas	Y	Fusiform	1
Verbeekinidae Staff et Wedekina,1910	Verb	Verbeekina Staff,1909	Verbeekina sphaera Ozawa,1927	Akiyoshi Terrane	4.39	3.93	equatorial areas	Y	Fusiform	1
Verbeekinidae Staff et Wedekina,1910	Verb	Verbeekina Staff,1909	Verbeekina sphaera Ozawa,1927	Akiyoshi Terrane	3.81	4	equatorial areas	Y	Fusiform	1
Schubertellidae Skinner,1931	Schu	Yangchienia Lee,1933	Yangchienia compressa (Ozawa,1927)	Akiyoshi Terrane	1.924	0.704	equatorial areas	N	Fusiform	1
Schubertellidae Skinner,1931	Schu	Yangchienia Lee,1933	Yangchienia compressa (Ozawa,1927)	Akiyoshi Terrane	1.592	0.884	equatorial areas	N	Fusiform	1
Schubertellidae Skinner,1931	Schu	Yangchienia Lee,1933	Yangchienia compressa (Ozawa,1927)	Akiyoshi Terrane	2.45	1.02	equatorial areas	N	Fusiform	1
Schubertellidae Skinner,1931	Schu	Yangchienia Lee,1933	Yangchienia compressa (Ozawa,1927)	Akiyoshi Terrane	2.55	1.12	equatorial areas	N	Fusiform	1
Schubertellidae Skinner,1931	Schu	Yangchienia Lee,1933	Yangchienia compressa (Ozawa,1927)	Akiyoshi Terrane	2.9	1.2	equatorial areas	N	Fusiform	1
Neoschwagerinidae Dunbar et Condra,1927	Neo	Afghanella Thompson,1946	Afghanella simplex Sheng,1963	South China	3.08	1.68	equatorial areas	Y	Fusiform	35	[11]
Neoschwagerinidae Dunbar et Condra,1927	Neo	Afghanella Thompson,1946	Afghanella schencki Thompson, 1946	South China	5.2	2.68	equatorial areas	Y	Fusiform	35
Verbeekinidae Staff et Wedekina,1910	Verb	Armenina M.-Maclay,1955	Armenina wangi Sheng,1963	South China	4.48	4.48	equatorial areas	Y	Fusiform	35
Verbeekinidae Staff et Wedekina,1910	Verb	Armenina M.-Maclay,1955	Armenina crassispira (Chen,1956)	South China	6.27	6.08	equatorial areas	Y	Fusiform	35
Schwagerinidae Dunbar et Henbest,1930	Schwag	Chusenella Hsu,1942	Chusenella tieni (Chen,1956)	South China	3.1	0.97	equatorial areas	Y	Fusiform	35
Schwagerinidae Dunbar et Henbest,1930	Schwag	Chusenella Hsu,1942	Chusenella douvillei (Colani,1924)	South China	3.61	1.52	equatorial areas	Y	Fusiform	35
Schwagerinidae Dunbar et Henbest,1930	Schwag	Chusenella Hsu,1942	Chusenella tieni (Chen,1956)	South China	4.88	1.64	equatorial areas	Y	Fusiform	35
Schwagerinidae Dunbar et Henbest,1930	Schwag	Chusenella Hsu,1942	Chusenella nana Sheng,1963	South China	3.6	1.66	equatorial areas	Y	Fusiform	35
Schwagerinidae Dunbar et Henbest,1930	Schwag	Chusenella Hsu,1942	Chusenella sinensis Sheng,1963	South China	4.1	1.8	equatorial areas	Y	Fusiform	35
Schwagerinidae Dunbar et Henbest,1930	Schwag	Chusenella Hsu,1942	Chusenella sinensis Sheng,1963	South China	4.92	1.86	equatorial areas	Y	Fusiform	35
Schwagerinidae Dunbar et Henbest,1930	Schwag	Chusenella Hsu,1942	Chusenella sinensis Sheng,1963	South China	4.79	1.96	equatorial areas	Y	Fusiform	35
Schwagerinidae Dunbar et Henbest,1930	Schwag	Chusenella Hsu,1942	Chusenella sinensis Sheng,1963	South China	5.24	2.24	equatorial areas	Y	Fusiform	35
Schwagerinidae Dunbar et Henbest,1930	Schwag	Chusenella Hsu,1942	Chusenella schwagerinaeformis Sheng,1963	South China	5.85	2.28	equatorial areas	Y	Fusiform	35
Schwagerinidae Dunbar et Henbest,1930	Schwag	Chusenella Hsu,1942	Chusenella sinensis Sheng,1963	South China	5.89	2.32	equatorial areas	Y	Fusiform	35
Schwagerinidae Dunbar et Henbest,1930	Schwag	Chusenella Hsu,1942	Chusenella cambodgiensis (Gubler,1935)	South China	9.6	2.42	equatorial areas	Y	Fusiform	35
Schwagerinidae Dunbar et Henbest,1930	Schwag	Chusenella Hsu,1942	Chusenella douvillei (Colani,1924)	South China	4.98	2.55	equatorial areas	Y	Fusiform	35
Schwagerinidae Dunbar et Henbest,1930	Schwag	Chusenella Hsu,1942	Chusenella schwagerinaeformis Sheng,1963	South China	5.4	2.55	equatorial areas	Y	Fusiform	35
Schwagerinidae Dunbar et Henbest,1930	Schwag	Chusenella Hsu,1942	Chusenella conicocylindrica Chen,1956	South China	6.38	2.66	equatorial areas	Y	Fusiform	35
Schwagerinidae Dunbar et Henbest,1930	Schwag	Chusenella Hsu,1942	Chusenella schwagerinaeformis Sheng,1963	South China	6.46	2.66	equatorial areas	Y	Fusiform	35
Schwagerinidae Dunbar et Henbest,1930	Schwag	Chusenella Hsu,1942	Chusenella sinensis Sheng,1963	South China	7.42	2.79	equatorial areas	Y	Fusiform	35
Schwagerinidae Dunbar et Henbest,1930	Schwag	Chusenella Hsu,1942	Chusenella schwagerinaeformis Sheng,1963	South China	6.7	3	equatorial areas	Y	Fusiform	35
Schwagerinidae Dunbar et Henbest,1930	Schwag	Chusenella Hsu,1942	Chusenella conicocylindrica Chen,1956	South China	7.6	3.12	equatorial areas	Y	Fusiform	35
Schwagerinidae Dunbar et Henbest,1930	Schwag	Chusenella Hsu,1942	Chusenella douvillei (Colani,1924)	South China	5.78	3.23	equatorial areas	Y	Fusiform	35
Schwagerinidae Dunbar et Henbest,1930	Schwag	Chusenella Hsu,1942	Chusenella ishanensis Hsu,1942	South China	9.72	3.9	equatorial areas	Y	Fusiform	35
Schwagerinidae Dunbar et Henbest,1930	Schwag	Chusenella Hsu,1942	Chusenella globularis (Gubler,1935)	South China	8.63	4	equatorial areas	Y	Fusiform	35
Schwagerinidae Dunbar et Henbest,1930	Schwag	Chusenella Hsu,1942	Chusenella douvillei (Colani,1924)	South China	7.8	4.26	equatorial areas	Y	Fusiform	35
Neoschwagerinidae Dunbar et Condra,1927	Neo	Colania Lee,1933	Colania douvillei (Ozawa, 1925)	South China	6.08	3.57	equatorial areas	Y	Fusiform	35
Neoschwagerinidae Dunbar et Condra,1927	Neo	Colania Lee,1933	Colania douvillei (Ozawa, 1925)	South China	6.84	3.65	equatorial areas	Y	Fusiform	35
Neoschwagerinidae Dunbar et Condra,1927	Neo	Colania Lee,1933	Colania douvillei (Ozawa, 1925)	South China	6.65	4.03	equatorial areas	Y	Fusiform	35
Verbeekinidae Staff et Wedekina,1910	Verb	Kahlerina Kochansky-Devidie et Ramovs,1955	Kahlerina minima Sheng,1963	South China	0.72	1	equatorial areas	Y	Fusiform	35
Verbeekinidae Staff et Wedekina,1910	Verb	Kahlerina Kochansky-Devidie et Ramovs,1955	Kahlerina minima Sheng,1963	South China	1.18	1.44	equatorial areas	Y	Fusiform	35
Verbeekinidae Staff et Wedekina,1910	Verb	Kahlerina Kochansky-Devidie et Ramovs,1955	Kahlerina sinensis Sheng,1963	South China	2.26	2.65	equatorial areas	Y	Fusiform	35
Verbeekinidae Staff et Wedekina,1910	Verb	Kahlerina Kochansky-Devidie et Ramovs,1955	Kahlerina sinensis Sheng,1963	South China	2.52	2.8	equatorial areas	Y	Fusiform	35
Schubertellidae Skinner,1931	Schu	Lantschichites Toumanskaya,1953	Lantschichites splendens (Skinner et Wilde,1954)	South China	2.443	0.375	equatorial areas	N	Fusiform	35
Schubertellidae Skinner,1931	Schu	Lantschichites Toumanskaya,1953	Lantschichites splendens (Skinner et Wilde,1954)	South China	2.528	0.443	equatorial areas	N	Fusiform	35
Schubertellidae Skinner,1931	Schu	Lantschichites Toumanskaya,1953	Lantschichites minima (Chen,1956)	South China	2.56	0.48	equatorial areas	N	Fusiform	35
Schubertellidae Skinner,1931	Schu	Lantschichites Toumanskaya,1953	Lantschichites splendens (Skinner et Wilde,1954)	South China	2.31	0.508	equatorial areas	N	Fusiform	35
Schubertellidae Skinner,1931	Schu	Lantschichites Toumanskaya,1953	Lantschichites minima (Chen,1956)	South China	2.2	0.58	equatorial areas	N	Fusiform	35
Schubertellidae Skinner,1931	Schu	Lantschichites Toumanskaya,1953	Lantschichites splendens (Skinner et Wilde,1954)	South China	3.28	0.7	equatorial areas	N	Fusiform	35
Schubertellidae Skinner,1931	Schu	Lantschichites Toumanskaya,1953	Lantschichites minima (Chen,1956)	South China	3.6	1	equatorial areas	N	Fusiform	35
Schubertellidae Skinner,1931	Schu	Lantschichites Toumanskaya,1953	Lantschichites minima (Chen,1956)	South China	3.72	1	equatorial areas	N	Fusiform	35
Neoschwagerinidae Dunbar et Condra,1927	Neo	Lepidolina Lee,1933	Lepidolina multiseptata (Deprat,1912)	South China	7.83	4.94	equatorial areas	Y	Fusiform	35
Neoschwagerinidae Dunbar et Condra,1927	Neo	Lepidolina Lee,1933	Lepidolina multiseptata (Deprat,1912)	South China	8.13	5.24	equatorial areas	Y	Fusiform	35
Verbeekinidae Staff et Wedekina,1910	Verb	Metadoliolina Ishii et Nogami,1961	Metadoliolina compacta (Chen,1956)	South China	2.96	1.14	equatorial areas	Y	Fusiform	35
Verbeekinidae Staff et Wedekina,1910	Verb	Metadoliolina Ishii et Nogami,1961	Metadoliolina compacta (Chen,1956)	South China	4.2	1.62	equatorial areas	Y	Fusiform	35
Verbeekinidae Staff et Wedekina,1910	Verb	Metadoliolina Ishii et Nogami,1961	Metadoliolina compacta (Chen,1956)	South China	5.08	2.52	equatorial areas	Y	Fusiform	35
Verbeekinidae Staff et Wedekina,1910	Verb	Metadoliolina Ishii et Nogami,1961	Metadoliolina pulchra (Sheng,1963)	South China	5.04	2.7	equatorial areas	Y	Fusiform	35
Verbeekinidae Staff et Wedekina,1910	Verb	Metadoliolina Ishii et Nogami,1961	Metadoliolina pulchra (Sheng,1963)	South China	5.48	2.74	equatorial areas	Y	Fusiform	35
Verbeekinidae Staff et Wedekina,1910	Verb	Metadoliolina Ishii et Nogami,1961	Metadoliolina pulchra (Sheng,1963)	South China	5.76	3.2	equatorial areas	Y	Fusiform	35
Verbeekinidae Staff et Wedekina,1910	Verb	Metadoliolina Ishii et Nogami,1961	Metadoliolina lepida (Schwager,1883)	South China	7.4	3.38	equatorial areas	Y	Fusiform	35
Verbeekinidae Staff et Wedekina,1910	Verb	Metadoliolina Ishii et Nogami,1961	Metadoliolina lepida (Schwager,1883)	South China	7.8	3.88	equatorial areas	Y	Fusiform	35
Verbeekinidae Staff et Wedekina,1910	Verb	Metadoliolina Ishii et Nogami,1961	Metadoliolina douvillei (Gubler,1935)	South China	4.93	4.25	equatorial areas	Y	Fusiform	35
Verbeekinidae Staff et Wedekina,1910	Verb	Metadoliolina Ishii et Nogami,1961	Metadoliolina sphaeroidea (Sheng,1963)	South China	5.47	4.56	equatorial areas	Y	Fusiform	35
Verbeekinidae Staff et Wedekina,1910	Verb	Metadoliolina Ishii et Nogami,1961	Metadoliolina sphaeroidea (Sheng,1963)	South China	5.51	4.83	equatorial areas	Y	Fusiform	35
Verbeekinidae Staff et Wedekina,1910	Verb	Metadoliolina Ishii et Nogami,1961	Metadoliolina sphaeroidea (Sheng,1963)	South China	6.08	5.28	equatorial areas	Y	Fusiform	35
Verbeekinidae Staff et Wedekina,1910	Verb	Metadoliolina Ishii et Nogami,1961	Metadoliolina multivoluta (Sheng,1963)	South China	8.62	5.36	equatorial areas	Y	Fusiform	35
Verbeekinidae Staff et Wedekina,1910	Verb	Metadoliolina Ishii et Nogami,1961	Metadoliolina douvillei (Gubler,1935)	South China	7.22	5.78	equatorial areas	Y	Fusiform	35
Verbeekinidae Staff et Wedekina,1910	Verb	Metadoliolina Ishii et Nogami,1961	Metadoliolina sphaeroidea (Sheng,1963)	South China	6.88	5.9	equatorial areas	Y	Fusiform	35
Verbeekinidae Staff et Wedekina,1910	Verb	Metadoliolina Ishii et Nogami,1961	Metadoliolina multivoluta (Sheng,1963)	South China	9.4	6.5	equatorial areas	Y	Fusiform	35
Verbeekinidae Staff et Wedekina,1910	Verb	Metadoliolina Ishii et Nogami,1961	Metadoliolina multivoluta (Sheng,1963)	South China	10.11	8.2	equatorial areas	Y	Fusiform	35
Schubertellidae Skinner,1931	Schu	Minojapanella Fujimoto et Kanuma,1953	Minojapanella parva Sheng,1963	South China	1.083	0.318	equatorial areas	N	Fusiform	35
Schubertellidae Skinner,1931	Schu	Minojapanella Fujimoto et Kanuma,1953	Minojapanella parva Sheng,1963	South China	1.7	0.45	equatorial areas	N	Fusiform	35
Neoschwagerinidae Dunbar et Condra,1927	Neo	Neoschwagerina Yabe,1903	Neoschwagerina simplex Ozawa,1927	South China	2.7	2.32	equatorial areas	Y	Fusiform	35
Neoschwagerinidae Dunbar et Condra,1927	Neo	Neoschwagerina Yabe,1903	Neoschwagerina schuberti Kochansky-Devide, 1958	South China	3.96	2.36	equatorial areas	Y	Fusiform	35
Neoschwagerinidae Dunbar et Condra,1927	Neo	Neoschwagerina Yabe,1903	Neoschwagerina schuberti Kochansky-Devide, 1958	South China	3.96	2.36	equatorial areas	Y	Fusiform	35
Neoschwagerinidae Dunbar et Condra,1927	Neo	Neoschwagerina Yabe,1903	Neoschwagerina simplex Ozawa,1927	South China	3.14	3.06	equatorial areas	Y	Fusiform	35
Neoschwagerinidae Dunbar et Condra,1927	Neo	Neoschwagerina Yabe,1903	Neoschwagerina simplex Ozawa,1927	South China	3.14	3.06	equatorial areas	Y	Fusiform	35
Neoschwagerinidae Dunbar et Condra,1927	Neo	Neoschwagerina Yabe,1903	Neoschwagerina craticulifera (Schwager, 1883)	South China	4.86	3.12	equatorial areas	Y	Fusiform	35
Neoschwagerinidae Dunbar et Condra,1927	Neo	Neoschwagerina Yabe,1903	Neoschwagerina kueichowensis Sheng,1963	South China	5.7	3.12	equatorial areas	Y	Fusiform	35
Neoschwagerinidae Dunbar et Condra,1927	Neo	Neoschwagerina Yabe,1903	Neoschwagerina craticulifera (Schwager, 1883)	South China	4.86	3.23	equatorial areas	Y	Fusiform	35
Neoschwagerinidae Dunbar et Condra,1927	Neo	Neoschwagerina Yabe,1903	Neoschwagerina kueichowensis Sheng,1963	South China	5.89	3.3	equatorial areas	Y	Fusiform	35
Neoschwagerinidae Dunbar et Condra,1927	Neo	Neoschwagerina Yabe,1903	Neoschwagerina kueichowensis Sheng,1963	South China	6.65	3.3	equatorial areas	Y	Fusiform	35
Neoschwagerinidae Dunbar et Condra,1927	Neo	Neoschwagerina Yabe,1903	Neoschwagerina craticulifera (Schwager, 1883)	South China	5.24	3.6	equatorial areas	Y	Fusiform	35
Neoschwagerinidae Dunbar et Condra,1927	Neo	Neoschwagerina Yabe,1903	Neoschwagerina craticulifera (Schwager, 1883)	South China	5.24	3.6	equatorial areas	Y	Fusiform	35
Neoschwagerinidae Dunbar et Condra,1927	Neo	Neoschwagerina Yabe,1903	Neoschwagerina multicircumvoluta Deprat, 1912	South China	4.37	3.88	equatorial areas	Y	Fusiform	35
Neoschwagerinidae Dunbar et Condra,1927	Neo	Neoschwagerina Yabe,1903	Neoschwagerina haydeni Dutkevich and Khabakov, 1934	South China	6.65	3.88	equatorial areas	Y	Fusiform	35
Neoschwagerinidae Dunbar et Condra,1927	Neo	Neoschwagerina Yabe,1903	Neoschwagerina multicircumvoluta Deprat, 1912	South China	4.75	3.99	equatorial areas	Y	Fusiform	35
Neoschwagerinidae Dunbar et Condra,1927	Neo	Neoschwagerina Yabe,1903	Neoschwagerina multicircumvoluta Deprat, 1912	South China	4.9	3.99	equatorial areas	Y	Fusiform	35
Neoschwagerinidae Dunbar et Condra,1927	Neo	Neoschwagerina Yabe,1903	Neoschwagerina megasphaerica Deprat, 1913	South China	7.6	3.99	equatorial areas	Y	Fusiform	35
Neoschwagerinidae Dunbar et Condra,1927	Neo	Neoschwagerina Yabe,1903	Neoschwagerina haydeni Dutkevich and Khabakov, 1934	South China	6.27	4.37	equatorial areas	Y	Fusiform	35
Neoschwagerinidae Dunbar et Condra,1927	Neo	Neoschwagerina Yabe,1903	Neoschwagerina haydeni Dutkevich and Khabakov, 1934	South China	6.84	4.75	equatorial areas	Y	Fusiform	35
Schwagerinidae Dunbar et Henbest,1930	Schwag	Parafusulina Dunbar et Skinner,1931	Parafusulina gigantea (Deprat,1913)	South China	6.65	2.7	equatorial areas	Y	Fusiform	35
Schwagerinidae Dunbar et Henbest,1930	Schwag	Parafusulina Dunbar et Skinner,1931	Parafusulina bosei Dunbar et Skinner,1937	South China	7.71	2.85	equatorial areas	Y	Fusiform	35
Schwagerinidae Dunbar et Henbest,1930	Schwag	Parafusulina Dunbar et Skinner,1931	Parafusulina bosei Dunbar et Skinner,1937	South China	8.2	3.04	equatorial areas	Y	Fusiform	35
Schwagerinidae Dunbar et Henbest,1930	Schwag	Parafusulina Dunbar et Skinner,1931	Parafusulina bosei Dunbar et Skinner,1937	South China	10.26	3.42	equatorial areas	Y	Fusiform	35
Schwagerinidae Dunbar et Henbest,1930	Schwag	Parafusulina Dunbar et Skinner,1931	Parafusulina gigantea (Deprat,1913)	South China	9.96	3.5	equatorial areas	Y	Fusiform	35
Schwagerinidae Dunbar et Henbest,1930	Schwag	Parafusulina Dunbar et Skinner,1931	Parafusulina bosei Dunbar et Skinner,1937	South China	10.34	3.8	equatorial areas	Y	Fusiform	35
Schwagerinidae Dunbar et Henbest,1930	Schwag	Parafusulina Dunbar et Skinner,1931	Parafusulina gigantea (Deprat,1913)	South China	11.93	3.8	equatorial areas	Y	Fusiform	35
Schwagerinidae Dunbar et Henbest,1930	Schwag	Parafusulina Dunbar et Skinner,1931	Parafusulina gigantea (Deprat,1913)	South China	10.42	3.9	equatorial areas	Y	Fusiform	35
Schwagerinidae Dunbar et Henbest,1930	Schwag	Parafusulina Dunbar et Skinner,1931	Parafusulina kwangsiana Sheng,1963	South China	11.2	4.07	equatorial areas	Y	Fusiform	35
Schwagerinidae Dunbar et Henbest,1930	Schwag	Parafusulina Dunbar et Skinner,1931	Parafusulina quasigruperaensis Sheng,1963	South China	7.2	4.08	equatorial areas	Y	Fusiform	35
Schwagerinidae Dunbar et Henbest,1930	Schwag	Parafusulina Dunbar et Skinner,1931	Parafusulina gigantea (Deprat,1913)	South China	10.26	4.12	equatorial areas	Y	Fusiform	35
Schwagerinidae Dunbar et Henbest,1930	Schwag	Parafusulina Dunbar et Skinner,1931	Parafusulina quasigruperaensis Sheng,1963	South China	7.87	4.37	equatorial areas	Y	Fusiform	35
Schwagerinidae Dunbar et Henbest,1930	Schwag	Parafusulina Dunbar et Skinner,1931	Parafusulina yabei Hanzawa, 1942	South China	13.6	4.4	equatorial areas	Y	Fusiform	35
Schwagerinidae Dunbar et Henbest,1930	Schwag	Parafusulina Dunbar et Skinner,1931	Parafusulina gigantea (Deprat,1913)	South China	11.78	4.64	equatorial areas	Y	Fusiform	35
Schwagerinidae Dunbar et Henbest,1930	Schwag	Parafusulina Dunbar et Skinner,1931	Parafusulina gigantea (Deprat,1913)	South China	13.5	4.64	equatorial areas	Y	Fusiform	35
Schwagerinidae Dunbar et Henbest,1930	Schwag	Parafusulina Dunbar et Skinner,1931	Parafusulina sapperi (Staff,1912)	South China	16.72	4.94	equatorial areas	Y	Fusiform	35
Verbeekinidae Staff et Wedekina,1910	Verb	Paraverbeekina M.-Maclay,1955	Paraverbeekina umbilicata Sheng,1963	South China	5.7	4.2	equatorial areas	Y	Fusiform	35
Verbeekinidae Staff et Wedekina,1910	Verb	Paraverbeekina M.-Maclay,1955	Paraverbeekina akasakensis (Thompson,1936)	South China	6	5.32	equatorial areas	Y	Fusiform	35
Verbeekinidae Staff et Wedekina,1910	Verb	Paraverbeekina M.-Maclay,1955	Paraverbeekina ellipsoidalis (Chen,1956)	South China	7.03	6.08	equatorial areas	Y	Fusiform	35
Verbeekinidae Staff et Wedekina,1910	Verb	Paraverbeekina M.-Maclay,1955	Paraverbeekina ellipsoidalis (Chen,1956)	South China	8.25	6.8	equatorial areas	Y	Fusiform	35
Verbeekinidae Staff et Wedekina,1910	Verb	Pseudodoliolina Yabe et Hanzawa,1932	Pseudodoliolina ozawai Yabe et Hanzawa,1932	South China	4.4	1.6	equatorial areas	Y	Fusiform	35
Verbeekinidae Staff et Wedekina,1910	Verb	Pseudodoliolina Yabe et Hanzawa,1932	Pseudodoliolina ozawai Yabe et Hanzawa,1932	South China	4.65	1.86	equatorial areas	Y	Fusiform	35
Verbeekinidae Staff et Wedekina,1910	Verb	Pseudodoliolina Yabe et Hanzawa,1932	Pseudodoliolina ozawai Yabe et Hanzawa,1932	South China	4.8	1.92	equatorial areas	Y	Fusiform	35
Verbeekinidae Staff et Wedekina,1910	Verb	Pseudodoliolina Yabe et Hanzawa,1932	Pseudodoliolina ozawai Yabe et Hanzawa,1932	South China	5	2	equatorial areas	Y	Fusiform	35
Verbeekinidae Staff et Wedekina,1910	Verb	Pseudodoliolina Yabe et Hanzawa,1932	Pseudodoliolina pseudolepida (Deprat,1912)	South China	4.42	2.08	equatorial areas	Y	Fusiform	35
Verbeekinidae Staff et Wedekina,1910	Verb	Pseudodoliolina Yabe et Hanzawa,1932	Pseudodoliolina chinghaiensis Sheng,1958	South China	4.24	2.12	equatorial areas	Y	Fusiform	35
Verbeekinidae Staff et Wedekina,1910	Verb	Pseudodoliolina Yabe et Hanzawa,1932	Pseudodoliolina chinghaiensis Sheng,1958	South China	4.2	2.18	equatorial areas	Y	Fusiform	35
Verbeekinidae Staff et Wedekina,1910	Verb	Pseudodoliolina Yabe et Hanzawa,1932	Pseudodoliolina chinghaiensis Sheng,1958	South China	4.5	2.24	equatorial areas	Y	Fusiform	35
Verbeekinidae Staff et Wedekina,1910	Verb	Pseudodoliolina Yabe et Hanzawa,1932	Pseudodoliolina pseudolepida (Deprat,1912)	South China	5.1	2.6	equatorial areas	Y	Fusiform	35
Verbeekinidae Staff et Wedekina,1910	Verb	Pseudodoliolina Yabe et Hanzawa,1932	Pseudodoliolina chinghaiensis Sheng,1958	South China	5	2.63	equatorial areas	Y	Fusiform	35
Verbeekinidae Staff et Wedekina,1910	Verb	Pseudodoliolina Yabe et Hanzawa,1932	Pseudodoliolina pseudolepida (Deprat,1912)	South China	6.24	3.44	equatorial areas	Y	Fusiform	35
Verbeekinidae Staff et Wedekina,1910	Verb	Pseudodoliolina Yabe et Hanzawa,1932	Pseudodoliolina pseudolepida (Deprat,1912)	South China	7.48	3.44	equatorial areas	Y	Fusiform	35
Schwagerinidae Dunbar et Henbest,1930	Schwag	Pseudofusulina Dunbar et Skinner,1931	Pseudofusulina declinata Korzhenevski	South China	4.6	2.2	equatorial areas	Y	Fusiform	35
Schwagerinidae Dunbar et Henbest,1930	Schwag	Pseudofusulina Dunbar et Skinner,1931	Pseudofusulina margheritii (Deprat,1912)	South China	5.7	2.32	equatorial areas	Y	Fusiform	35
Schwagerinidae Dunbar et Henbest,1930	Schwag	Pseudofusulina Dunbar et Skinner,1931	Pseudofusulina margheritii (Deprat,1912)	South China	6.08	2.36	equatorial areas	Y	Fusiform	35
Schwagerinidae Dunbar et Henbest,1930	Schwag	Pseudofusulina Dunbar et Skinner,1931	Pseudofusulina declinata Korzhenevski	South China	5.89	2.47	equatorial areas	Y	Fusiform	35
Schwagerinidae Dunbar et Henbest,1930	Schwag	Pseudofusulina Dunbar et Skinner,1931	Pseudofusulina margheritii (Deprat,1912)	South China	7.22	2.7	equatorial areas	Y	Fusiform	35
Schubertellidae Skinner,1931	Schu	Russiella M.-Maclay,1957	Russiella pulchra (A.M.Maclay, 1957)	South China	1.76	0.44	equatorial areas	N	Fusiform	35
Schubertellidae Skinner,1931	Schu	Russiella M.-Maclay,1957	Russiella pulchra (A.M.Maclay, 1957)	South China	2.6	0.62	equatorial areas	N	Fusiform	35
Schubertellidae Skinner,1931	Schu	Russiella M.-Maclay,1957	Russiella pulchra (A.M.Maclay, 1957)	South China	2.56	0.64	equatorial areas	N	Fusiform	35
Schubertellidae Skinner,1931	Schu	Russiella M.-Maclay,1957	Russiella pulchra (A.M.Maclay, 1957)	South China	2.72	0.68	equatorial areas	N	Fusiform	35
Schubertellidae Skinner,1931	Schu	Russiella M.-Maclay,1957	Russiella pulchra (A.M.Maclay, 1957)	South China	3.2	0.78	equatorial areas	N	Fusiform	35
Schwagerinidae Dunbar et Henbest,1930	Schwag	Schwagerina Moeller,1877	Schwagerina quasiregularis Sheng,1963	South China	2.58	0.87	equatorial areas	Y	Fusiform	35
Schwagerinidae Dunbar et Henbest,1930	Schwag	Schwagerina Moeller,1877	Schwagerina pseudocompacta Sheng,1956	South China	2.51	1.06	equatorial areas	Y	Fusiform	35
Schwagerinidae Dunbar et Henbest,1930	Schwag	Schwagerina Moeller,1877	Schwagerina quasiregularis Sheng,1963	South China	3.42	1.06	equatorial areas	Y	Fusiform	35
Schwagerinidae Dunbar et Henbest,1930	Schwag	Schwagerina Moeller,1877	Schwagerina pseudocompacta Sheng,1956	South China	3.8	1.48	equatorial areas	Y	Fusiform	35
Schwagerinidae Dunbar et Henbest,1930	Schwag	Schwagerina Moeller,1877	Schwagerina quasiregularis Sheng,1963	South China	4.18	1.48	equatorial areas	Y	Fusiform	35
Schwagerinidae Dunbar et Henbest,1930	Schwag	Schwagerina Moeller,1877	Schwagerina pseudocompacta Sheng,1956	South China	3.7	1.52	equatorial areas	Y	Fusiform	35
Schwagerinidae Dunbar et Henbest,1930	Schwag	Schwagerina Moeller,1877	Schwagerina kwangchiensis Chen,1956	South China	6.08	1.67	equatorial areas	Y	Fusiform	35
Schwagerinidae Dunbar et Henbest,1930	Schwag	Schwagerina Moeller,1877	Schwagerina quasiregularis Sheng,1963	South China	5.08	1.75	equatorial areas	Y	Fusiform	35
Schwagerinidae Dunbar et Henbest,1930	Schwag	Schwagerina Moeller,1877	Schwagerina quasibrevipola Sheng,1963	South China	4.63	1.77	equatorial areas	Y	Fusiform	35
Schwagerinidae Dunbar et Henbest,1930	Schwag	Schwagerina Moeller,1877	Schwagerina quasiregularis Sheng,1963	South China	5.02	1.9	equatorial areas	Y	Fusiform	35
Schwagerinidae Dunbar et Henbest,1930	Schwag	Schwagerina Moeller,1877	Schwagerina kwangchiensis Chen,1956	South China	7.22	2.47	equatorial areas	Y	Fusiform	35
Schwagerinidae Dunbar et Henbest,1930	Schwag	Schwagerina Moeller,1877	Schwagerina pindingensis Sheng, 1963	South China	5.13	2.62	equatorial areas	Y	Fusiform	35
Schwagerinidae Dunbar et Henbest,1930	Schwag	Schwagerina Moeller,1877	Schwagerina quasibrevipola Sheng,1963	South China	5.47	2.62	equatorial areas	Y	Fusiform	35
Schwagerinidae Dunbar et Henbest,1930	Schwag	Schwagerina Moeller,1877	Schwagerina pindingensis Sheng, 1963	South China	5.32	2.66	equatorial areas	Y	Fusiform	35
Schwagerinidae Dunbar et Henbest,1930	Schwag	Schwagerina Moeller,1877	Schwagerina pindingensis Sheng, 1963	South China	4.94	2.74	equatorial areas	Y	Fusiform	35
Schwagerinidae Dunbar et Henbest,1930	Schwag	Schwagerina Moeller,1877	Schwagerina pindingensis Sheng, 1963	South China	5.85	2.96	equatorial areas	Y	Fusiform	35
Schwagerinidae Dunbar et Henbest,1930	Schwag	Schwagerina Moeller,1877	Schwagerina kentangensis Sheng,1963	South China	7.21	2.97	equatorial areas	Y	Fusiform	35
Schwagerinidae Dunbar et Henbest,1930	Schwag	Schwagerina Moeller,1877	Schwagerina parayunnanensis Sheng,1963	South China	7.6	3	equatorial areas	Y	Fusiform	35
Schwagerinidae Dunbar et Henbest,1930	Schwag	Schwagerina Moeller,1877	Schwagerina quasibrevipola Sheng,1963	South China	5.93	3.15	equatorial areas	Y	Fusiform	35
Schwagerinidae Dunbar et Henbest,1930	Schwag	Schwagerina Moeller,1877	Schwagerina kentangensis Sheng,1963	South China	6.46	3.23	equatorial areas	Y	Fusiform	35
Schwagerinidae Dunbar et Henbest,1930	Schwag	Schwagerina Moeller,1877	Schwagerina compacta (White,1932)	South China	9.12	3.3	equatorial areas	Y	Fusiform	35
Schwagerinidae Dunbar et Henbest,1930	Schwag	Schwagerina Moeller,1877	Schwagerina compacta (White,1932)	South China	7.09	3.34	equatorial areas	Y	Fusiform	35
Neoschwagerinidae Dunbar et Condra,1927	Neo	Sumatrina Volz,1904	Sumatrina fusiformis Sheng,1958	South China	4.9	1.4	equatorial areas	Y	Fusiform	35
Neoschwagerinidae Dunbar et Condra,1927	Neo	Sumatrina Volz,1904	Sumatrina longissima Deprat,1914	South China	5.7	1.4	equatorial areas	Y	Fusiform	35
Neoschwagerinidae Dunbar et Condra,1927	Neo	Sumatrina Volz,1904	Sumatrina longissima Deprat,1914	South China	6.27	1.5	equatorial areas	Y	Fusiform	35
Neoschwagerinidae Dunbar et Condra,1927	Neo	Sumatrina Volz,1904	Sumatrina annae Volz,1904	South China	4.48	1.56	equatorial areas	Y	Fusiform	35
Neoschwagerinidae Dunbar et Condra,1927	Neo	Sumatrina Volz,1904	Sumatrina fusiformis Sheng,1958	South China	5.7	1.6	equatorial areas	Y	Fusiform	35
Neoschwagerinidae Dunbar et Condra,1927	Neo	Sumatrina Volz,1904	Sumatrina annae Volz,1904	South China	5.13	1.8	equatorial areas	Y	Fusiform	35
Neoschwagerinidae Dunbar et Condra,1927	Neo	Sumatrina Volz,1904	Sumatrina annae Volz,1904	South China	5.62	2.13	equatorial areas	Y	Fusiform	35
Neoschwagerinidae Dunbar et Condra,1927	Neo	Sumatrina Volz,1904	Sumatrina annae Volz,1904	South China	6.5	2.44	equatorial areas	Y	Fusiform	35
Verbeekinidae Staff et Wedekina,1910	Verb	Verbeekina Staff,1909	Verbeekina verbeeki (Geinitz,1876)	South China	3.53	3.95	equatorial areas	Y	Fusiform	35
Verbeekinidae Staff et Wedekina,1910	Verb	Verbeekina Staff,1909	Verbeekina grabaui Thompson et Foster,1937	South China	5.18	5.36	equatorial areas	Y	Fusiform	35
Verbeekinidae Staff et Wedekina,1910	Verb	Verbeekina Staff,1909	Verbeekina heimi Thompson et Foster,1937	South China	5.7	5.6	equatorial areas	Y	Fusiform	35
Verbeekinidae Staff et Wedekina,1910	Verb	Verbeekina Staff,1909	Verbeekina verbeeki (Geinitz,1876)	South China	5.6	5.7	equatorial areas	Y	Fusiform	35
Verbeekinidae Staff et Wedekina,1910	Verb	Verbeekina Staff,1909	Verbeekina heimi Thompson et Foster,1937	South China	5.78	5.74	equatorial areas	Y	Fusiform	35
Verbeekinidae Staff et Wedekina,1910	Verb	Verbeekina Staff,1909	Verbeekina verbeeki (Geinitz,1876)	South China	6.5	6.31	equatorial areas	Y	Fusiform	35
Verbeekinidae Staff et Wedekina,1910	Verb	Verbeekina Staff,1909	Verbeekina tenuispira Sheng,1963	South China	5.94	6.39	equatorial areas	Y	Fusiform	35
Verbeekinidae Staff et Wedekina,1910	Verb	Verbeekina Staff,1909	Verbeekina heimi Thompson et Foster,1937	South China	7.45	6.92	equatorial areas	Y	Fusiform	35
Verbeekinidae Staff et Wedekina,1910	Verb	Verbeekina Staff,1909	Verbeekina verbeeki (Geinitz,1876)	South China	6.91	6.94	equatorial areas	Y	Fusiform	35
Verbeekinidae Staff et Wedekina,1910	Verb	Verbeekina Staff,1909	Verbeekina heimi Thompson et Foster,1937	South China	7.45	7.35	equatorial areas	Y	Fusiform	35
Verbeekinidae Staff et Wedekina,1910	Verb	Verbeekina Staff,1909	Verbeekina verbeeki (Geinitz,1876)	South China	7.88	7.75	equatorial areas	Y	Fusiform	35
Verbeekinidae Staff et Wedekina,1910	Verb	Verbeekina Staff,1909	Verbeekina heimi Thompson et Foster,1937	South China	8.02	7.9	equatorial areas	Y	Fusiform	35
Verbeekinidae Staff et Wedekina,1910	Verb	Verbeekina Staff,1909	Verbeekina tenuispira Sheng,1963	South China	10.64	11.3	equatorial areas	Y	Fusiform	35
Verbeekinidae Staff et Wedekina,1910	Verb	Verbeekina Staff,1909	Verbeekina tenuispira Sheng,1963	South China	10.64	11.3	equatorial areas	Y	Fusiform	35
Schubertellidae Skinner,1931	Schu	Wutuella Sheng,1963	Wutuella wutuensis (Kuo,1948)	South China	3	0.56	equatorial areas	N	Fusiform	35
Schubertellidae Skinner,1931	Schu	Wutuella Sheng,1963	Wutuella wutuensis (Kuo,1948)	South China	3.86	0.7	equatorial areas	N	Fusiform	35
Schubertellidae Skinner,1931	Schu	Wutuella Sheng,1963	Wutuella wutuensis (Kuo,1948)	South China	3.9	0.72	equatorial areas	N	Fusiform	35
Schubertellidae Skinner,1931	Schu	Wutuella Sheng,1963	Wutuella wutuensis (Kuo,1948)	South China	4.84	0.94	equatorial areas	N	Fusiform	35
Neoschwagerinidae Dunbar et Condra,1927	Neo	Yabeina Deprat,1914	Yabeina kwangsiana (Lee,1933)	South China	5.78	2.82	equatorial areas	Y	Fusiform	35
Neoschwagerinidae Dunbar et Condra,1927	Neo	Yabeina Deprat,1914	Yabeina kwangsiana (Lee,1933)	South China	7.6	3.54	equatorial areas	Y	Fusiform	35
Neoschwagerinidae Dunbar et Condra,1927	Neo	Yabeina Deprat,1914	Yabeina kwangsiana (Lee,1933)	South China	7.98	3.72	equatorial areas	Y	Fusiform	35
Neoschwagerinidae Dunbar et Condra,1927	Neo	Yabeina Deprat,1914	Yabeina gubleri Kanmera,1954	South China	9.88	4.18	equatorial areas	Y	Fusiform	35
Neoschwagerinidae Dunbar et Condra,1927	Neo	Yabeina Deprat,1914	Yabeina gubleri Kanmera,1954	South China	9.08	4.29	equatorial areas	Y	Fusiform	35
Neoschwagerinidae Dunbar et Condra,1927	Neo	Yabeina Deprat,1914	Yabeina kwangsiana (Lee,1933)	South China	8.93	4.64	equatorial areas	Y	Fusiform	35
Neoschwagerinidae Dunbar et Condra,1927	Neo	Yabeina Deprat,1914	Yabeina gubleri Kanmera,1954	South China	11.02	4.64	equatorial areas	Y	Fusiform	35
Neoschwagerinidae Dunbar et Condra,1927	Neo	Yabeina Deprat,1914	Yabeina gubleri Kanmera,1954	South China	11.02	4.64	equatorial areas	Y	Fusiform	35
Neoschwagerinidae Dunbar et Condra,1927	Neo	Yabeina Deprat,1914	Yabeina inouyei Deprat,1914	South China	8.89	6.31	equatorial areas	Y	Fusiform	35
Schubertellidae Skinner,1931	Schu	Yangchienia Lee,1933	Yangchienia compressa (Ozawa,1927)	South China	1.9	0.84	equatorial areas	N	Fusiform	35
Schubertellidae Skinner,1931	Schu	Yangchienia Lee,1933	Yangchienia compressa (Ozawa,1927)	South China	2.2	1.04	equatorial areas	N	Fusiform	35
Schubertellidae Skinner,1931	Schu	Yangchienia Lee,1933	Yangchienia compressa (Ozawa,1927)	South China	2.36	1.14	equatorial areas	N	Fusiform	35
Schubertellidae Skinner,1931	Schu	Yangchienia Lee,1933	Yangchienia kwangsiensis Chen,1956	South China	2	1.2	equatorial areas	N	Fusiform	35
Schubertellidae Skinner,1931	Schu	Yangchienia Lee,1933	Yangchienia iniqua Lee,1933	South China	2.135	1.27	equatorial areas	N	Fusiform	35
Schubertellidae Skinner,1931	Schu	Yangchienia Lee,1933	Yangchienia iniqua Lee,1933	South China	2.08	1.3	equatorial areas	N	Fusiform	35
Schubertellidae Skinner,1931	Schu	Yangchienia Lee,1933	Yangchienia compressa (Ozawa,1927)	South China	2.94	1.35	equatorial areas	N	Fusiform	35
Schubertellidae Skinner,1931	Schu	Yangchienia Lee,1933	Yangchienia kwangsiensis Chen,1956	South China	1.544	1.384	equatorial areas	N	Fusiform	35
Schubertellidae Skinner,1931	Schu	Yangchienia Lee,1933	Yangchienia tobleri Thompson,1935	South China	2.84	1.42	equatorial areas	N	Fusiform	35
Schubertellidae Skinner,1931	Schu	Yangchienia Lee,1933	Yangchienia iniqua Lee,1933	South China	2.58	1.64	equatorial areas	N	Fusiform	35
Schubertellidae Skinner,1931	Schu	Yangchienia Lee,1933	Yangchienia iniqua Lee,1933	South China	2.52	1.66	equatorial areas	N	Fusiform	35
Schubertellidae Skinner,1931	Schu	Yangchienia Lee,1933	Yangchienia tobleri Thompson,1935	South China	3.4	1.66	equatorial areas	N	Fusiform	35
Schubertellidae Skinner,1931	Schu	Yangchienia Lee,1933	Yangchienia tobleri Thompson,1935	South China	3.36	1.68	equatorial areas	N	Fusiform	35
Schubertellidae Skinner,1931	Schu	Yangchienia Lee,1933	Yangchienia haydeni Thompson,1946	South China	3.3	1.72	equatorial areas	N	Fusiform	35
Schubertellidae Skinner,1931	Schu	Yangchienia Lee,1933	Yangchienia tobleri Thompson,1935	South China	3.48	1.74	equatorial areas	N	Fusiform	35
Schubertellidae Skinner,1931	Schu	Yangchienia Lee,1933	Yangchienia tobleri Thompson,1935	South China	3.5	1.74	equatorial areas	N	Fusiform	35
Schubertellidae Skinner,1931	Schu	Yangchienia Lee,1933	Yangchienia haydeni Thompson,1946	South China	3.44	1.84	equatorial areas	N	Fusiform	35
Schubertellidae Skinner,1931	Schu	Yangchienia Lee,1933	Yangchienia tobleri Thompson,1935	South China	3.8	1.9	equatorial areas	N	Fusiform	35
Schubertellidae Skinner,1931	Schu	Yangchienia Lee,1933	Yangchienia haydeni Thompson,1946	South China	3.72	2.04	equatorial areas	N	Fusiform	35
Schwagerinidae Dunbar et Henbest,1930	Schwag	Chusenella Hsu,1942	Chusenella choshiensis Chisaka,1960	Kitakami Terrane	11.2	3.8	north transitional zone	Y	Fusiform	17	[12]
Schwagerinidae Dunbar et Henbest,1930	Schwag	Chusenella Hsu,1942	Chusenella pseudocrassa (Kanmera,1954)	Kitakami Terrane	9.88	4.22	north transitional zone	Y	Fusiform	17
Schwagerinidae Dunbar et Henbest,1930	Schwag	Chusenella Hsu,1942	Chusenella pseudocrassa (Kanmera,1954)	Kitakami Terrane	10.4	4.4	north transitional zone	Y	Fusiform	17
Schwagerinidae Dunbar et Henbest,1930	Schwag	Chusenella Hsu,1942	Chusenella pseudocrassa (Kanmera,1954)	Kitakami Terrane	8.19	4.47	north transitional zone	Y	Fusiform	17
Schwagerinidae Dunbar et Henbest,1930	Schwag	Chusenella Hsu,1942	Chusenella pseudocrassa (Kanmera,1954)	Kitakami Terrane	8.6	4.8	north transitional zone	Y	Fusiform	17
Schwagerinidae Dunbar et Henbest,1930	Schwag	Chusenella Hsu,1942	Chusenella pseudocrassa (Kanmera,1954)	Kitakami Terrane	7.88	4.85	north transitional zone	Y	Fusiform	17
Schwagerinidae Dunbar et Henbest,1930	Schwag	Chusenella Hsu,1942	Chusenella pseudocrassa (Kanmera,1954)	Kitakami Terrane	10.33	5.05	north transitional zone	Y	Fusiform	17
Schubertellidae Skinner,1931	Schu	Codonofusiella Dunbar et Skinner,1937	Codonofusiella explicata Kawano, 1960	Kitakami Terrane	0.466	0.188	north transitional zone	N	Fusiform	17
Schubertellidae Skinner,1931	Schu	Codonofusiella Dunbar et Skinner,1937	Codonofusiella explicata Kawano, 1960	Kitakami Terrane	1.65	0.55	north transitional zone	N	Fusiform	17
Schubertellidae Skinner,1931	Schu	Codonofusiella Dunbar et Skinner,1937	Codonofusiella explicata Kawano, 1960	Kitakami Terrane	1.635	0.555	north transitional zone	N	Fusiform	17
Neoschwagerinidae Dunbar et Condra,1927	Neo	Lepidolina Lee,1933	Lepidolina multiseptata (Deprat,1912)	Kitakami Terrane	7.77	5.32	north transitional zone	Y	Fusiform	17
Neoschwagerinidae Dunbar et Condra,1927	Neo	Lepidolina Lee,1933	Lepidolina multiseptata (Deprat,1912)	Kitakami Terrane	7.95	5.33	north transitional zone	Y	Fusiform	17
Schwagerinidae Dunbar et Henbest,1930	Schwag	Monodiexodina Sosnina,1956	Monodiexodina sutchanica (Dutkevich in Likharev, 1939)	Kitakami Terrane	7.35	1.31	north transitional zone	Y	Fusiform	17
Schwagerinidae Dunbar et Henbest,1930	Schwag	Parafusulina Dunbar et Skinner,1931	Parafusulina motoyoshiensis (Morikawa,1960)	Kitakami Terrane	8.67	1.58	north transitional zone	Y	Fusiform	17
Schwagerinidae Dunbar et Henbest,1930	Schwag	Parafusulina Dunbar et Skinner,1931	Parafusulina motoyoshiensis (Morikawa,1960)	Kitakami Terrane	5.56	1.62	north transitional zone	Y	Fusiform	17
Schwagerinidae Dunbar et Henbest,1930	Schwag	Parafusulina Dunbar et Skinner,1931	Parafusulina motoyoshiensis (Morikawa,1960)	Kitakami Terrane	8.56	1.76	north transitional zone	Y	Fusiform	17
Schwagerinidae Dunbar et Henbest,1930	Schwag	Parafusulina Dunbar et Skinner,1931	Parafusulina motoyoshiensis (Morikawa,1960)	Kitakami Terrane	8.12	1.95	north transitional zone	Y	Fusiform	17
Schwagerinidae Dunbar et Henbest,1930	Schwag	Parafusulina Dunbar et Skinner,1931	Parafusulina motoyoshiensis (Morikawa,1960)	Kitakami Terrane	9	1.95	north transitional zone	Y	Fusiform	17
Schwagerinidae Dunbar et Henbest,1930	Schwag	Parafusulina Dunbar et Skinner,1931	Parafusulina motoyoshiensis (Morikawa,1960)	Kitakami Terrane	9.56	2.08	north transitional zone	Y	Fusiform	17
Schwagerinidae Dunbar et Henbest,1930	Schwag	Parafusulina Dunbar et Skinner,1931	Parafusulina motoyoshiensis (Morikawa,1960)	Kitakami Terrane	10.03	2.14	north transitional zone	Y	Fusiform	17
Schwagerinidae Dunbar et Henbest,1930	Schwag	Parafusulina Dunbar et Skinner,1931	Parafusulina motoyoshiensis (Morikawa,1960)	Kitakami Terrane	5.46	2.16	north transitional zone	Y	Fusiform	17
Schwagerinidae Dunbar et Henbest,1930	Schwag	Parafusulina Dunbar et Skinner,1931	Parafusulina motoyoshiensis (Morikawa,1960)	Kitakami Terrane	6.93	2.25	north transitional zone	Y	Fusiform	17
Schwagerinidae Dunbar et Henbest,1930	Schwag	Parafusulina Dunbar et Skinner,1931	Parafusulina motoyoshiensis (Morikawa,1960)	Kitakami Terrane	8.32	2.29	north transitional zone	Y	Fusiform	17
Schwagerinidae Dunbar et Henbest,1930	Schwag	Parafusulina Dunbar et Skinner,1931	Parafusulina motoyoshiensis (Morikawa,1960)	Kitakami Terrane	10.39	2.44	north transitional zone	Y	Fusiform	17
Schwagerinidae Dunbar et Henbest,1930	Schwag	Parafusulina Dunbar et Skinner,1931	Parafusulina motoyoshiensis (Morikawa,1960)	Kitakami Terrane	9.5	2.6	north transitional zone	Y	Fusiform	17
Schwagerinidae Dunbar et Henbest,1930	Schwag	Parafusulina Dunbar et Skinner,1931	Parafusulina motoyoshiensis (Morikawa,1960)	Kitakami Terrane	9.32	2.75	north transitional zone	Y	Fusiform	17
Verbeekinidae Staff et Wedekina,1910	Verb	Pseudodoliolina Yabe et Hanzawa,1932	Pseudodoliolina elongata Choi,1970	Kitakami Terrane	4.81	1.8	north transitional zone	Y	Fusiform	17
Verbeekinidae Staff et Wedekina,1910	Verb	Pseudodoliolina Yabe et Hanzawa,1932	Pseudodoliolina elongata Choi,1970	Kitakami Terrane	7.97	2.03	north transitional zone	Y	Fusiform	17
Verbeekinidae Staff et Wedekina,1910	Verb	Pseudodoliolina Yabe et Hanzawa,1932	Pseudodoliolina elongata Choi,1970	Kitakami Terrane	5.22	2.12	north transitional zone	Y	Fusiform	17
Verbeekinidae Staff et Wedekina,1910	Verb	Pseudodoliolina Yabe et Hanzawa,1932	Pseudodoliolina elongata Choi,1970	Kitakami Terrane	8.8	2.4	north transitional zone	Y	Fusiform	17
Verbeekinidae Staff et Wedekina,1910	Verb	Pseudodoliolina Yabe et Hanzawa,1932	Pseudodoliolina elongata Choi,1970	Kitakami Terrane	6.515	3.39	north transitional zone	Y	Fusiform	17
Schwagerinidae Dunbar et Henbest,1930	Schwag	Pseudofusulina Dunbar et Skinner,1931	Pseudofusulina kraffti (Schellwien et Dyrenfurth,1909)	Kitakami Terrane	7.13	2.58	north transitional zone	Y	Fusiform	17
Ozawainellidae Thompson et Foster,1937	Oza	Rauserella Dunbar,1944	Rauserella alveolaris Choi,1970	Kitakami Terrane	3.18	1.2	north transitional zone	N	Lenticular	17
Verbeekinidae Staff et Wedekina,1910	Verb	Verbeekina Staff,1909	Verbeekina verbeeki (Geinitz,1876)	Kitakami Terrane	4.8	4.48	north transitional zone	Y	Fusiform	17
Verbeekinidae Staff et Wedekina,1910	Verb	Verbeekina Staff,1909	Verbeekina verbeeki (Geinitz,1876)	Kitakami Terrane	8	8	north transitional zone	Y	Fusiform	17
Neoschwagerinidae Dunbar et Condra,1927	Neo	Colania Lee,1933	Colania kotsuboensis Choi,1973	Kitakami Terrane	8.23	3.82	north transitional zone	Y	Fusiform	17	[13]
Neoschwagerinidae Dunbar et Condra,1927	Neo	Colania Lee,1933	Colania kotsuboensis Choi,1973	Kitakami Terrane	11	5.3	north transitional zone	Y	Fusiform	17
Verbeekinidae Staff et Wedekina,1910	Verb	Eoverbeekina Lee,1933	Eoverbeekina americana Thompson, Wheeler and Danner, 1950	Kitakami Terrane	2.11	3.3	north transitional zone	Y	Fusiform	17
Verbeekinidae Staff et Wedekina,1910	Verb	Kahlerina Kochansky-Devidie et Ramovs,1955	Kahlerina pachytheca Kochansky-Devide et Ramovs,1955	Kitakami Terrane	1	2.23	north transitional zone	Y	Fusiform	17
Verbeekinidae Staff et Wedekina,1910	Verb	Kahlerina Kochansky-Devidie et Ramovs,1955	Kahlerina pachytheca Kochansky-Devide et Ramovs,1955	Kitakami Terrane	1.72	2.36	north transitional zone	Y	Fusiform	17
Verbeekinidae Staff et Wedekina,1910	Verb	Kahlerina Kochansky-Devidie et Ramovs,1955	Kahlerina pachytheca Kochansky-Devide et Ramovs,1955	Kitakami Terrane	1.34	2.41	north transitional zone	Y	Fusiform	17
Neoschwagerinidae Dunbar et Condra,1927	Neo	Lepidolina Lee,1933	Lepidolina kumaensis Kanmera,1954	Kitakami Terrane	9.14	2.34	north transitional zone	Y	Fusiform	17
Neoschwagerinidae Dunbar et Condra,1927	Neo	Lepidolina Lee,1933	Lepidolina minatoi Choi,1973	Kitakami Terrane	9.8	2.55	north transitional zone	Y	Fusiform	17
Neoschwagerinidae Dunbar et Condra,1927	Neo	Lepidolina Lee,1933	Lepidolina minatoi Choi,1973	Kitakami Terrane	16.16	3.86	north transitional zone	Y	Fusiform	17
Neoschwagerinidae Dunbar et Condra,1927	Neo	Lepidolina Lee,1933	Lepidolina multiseptata (Deprat,1912)	Kitakami Terrane	9.76	4.79	north transitional zone	Y	Fusiform	17
Neoschwagerinidae Dunbar et Condra,1927	Neo	Lepidolina Lee,1933	Lepidolina multiseptata (Deprat,1912)	Kitakami Terrane	9.85	4.79	north transitional zone	Y	Fusiform	17
Neoschwagerinidae Dunbar et Condra,1927	Neo	Lepidolina Lee,1933	Lepidolina minatoi Choi,1973	Kitakami Terrane	16.97	5.76	north transitional zone	Y	Fusiform	17
Neoschwagerinidae Dunbar et Condra,1927	Neo	Lepidolina Lee,1933	Lepidolina multiseptata (Deprat,1912)	Kitakami Terrane	7.88	5.81	north transitional zone	Y	Fusiform	17
Neoschwagerinidae Dunbar et Condra,1927	Neo	Lepidolina Lee,1933	Lepidolina minatoi Choi,1973	Kitakami Terrane	30	7	north transitional zone	Y	Fusiform	17
Schubertellidae Skinner,1931	Schu	Minojapanella Fujimoto et Kanuma,1953	Minojapanella elongata Fujimoto and Kanuma, 1953	Kitakami Terrane	1.614	0.33	north transitional zone	N	Fusiform	17
Schubertellidae Skinner,1931	Schu	Minojapanella Fujimoto et Kanuma,1953	Minojapanella elongata Fujimoto and Kanuma, 1953	Kitakami Terrane	2.175	0.445	north transitional zone	N	Fusiform	17
Schubertellidae Skinner,1931	Schu	Minojapanella Fujimoto et Kanuma,1953	Minojapanella elongata Fujimoto and Kanuma, 1953	Kitakami Terrane	1.66	0.5	north transitional zone	N	Fusiform	17
Schwagerinidae Dunbar et Henbest,1930	Schwag	Monodiexodina Sosnina,1956	Monodiexodina sutchanica (Dutkevich in Likharev, 1939)	Kitakami Terrane	18.15	1.36	north transitional zone	Y	Fusiform	17
Schwagerinidae Dunbar et Henbest,1930	Schwag	Monodiexodina Sosnina,1956	Monodiexodina sutchanica (Dutkevich in Likharev, 1939)	Kitakami Terrane	18.18	1.41	north transitional zone	Y	Fusiform	17
Schwagerinidae Dunbar et Henbest,1930	Schwag	Monodiexodina Sosnina,1956	Monodiexodina sutchanica (Dutkevich in Likharev, 1939)	Kitakami Terrane	8.82	2.8	north transitional zone	Y	Fusiform	17
Schwagerinidae Dunbar et Henbest,1930	Schwag	Monodiexodina Sosnina,1956	Monodiexodina sutchanica (Dutkevich in Likharev, 1939)	Kitakami Terrane	12.48	2.95	north transitional zone	Y	Fusiform	17
Schwagerinidae Dunbar et Henbest,1930	Schwag	Monodiexodina Sosnina,1956	Monodiexodina sutchanica (Dutkevich in Likharev, 1939)	Kitakami Terrane	11.24	3.16	north transitional zone	Y	Fusiform	17
Schwagerinidae Dunbar et Henbest,1930	Schwag	Monodiexodina Sosnina,1956	Monodiexodina sutchanica (Dutkevich in Likharev, 1939)	Kitakami Terrane	11.62	3.36	north transitional zone	Y	Fusiform	17
Schwagerinidae Dunbar et Henbest,1930	Schwag	Monodiexodina Sosnina,1956	Monodiexodina sutchanica (Dutkevich in Likharev, 1939)	Kitakami Terrane	15	3.5	north transitional zone	Y	Fusiform	17
Staffellidae A.D.Miklukho-Maklay, 1949	Staff	Nankinella Lee,1933	Nankinella orbicularia Lee, 1933	Kitakami Terrane	1.82	2.72	north transitional zone	N	Lenticular	17
Staffellidae A.D.Miklukho-Maklay, 1949	Staff	Nankinella Lee,1933	Nankinella orbicularia Lee, 1933	Kitakami Terrane	2.15	2.96	north transitional zone	N	Lenticular	17
Schwagerinidae Dunbar et Henbest,1930	Schwag	Parafusulina Dunbar et Skinner,1931	Parafusulina motoyoshiensis (Morikawa,1960)	Kitakami Terrane	8.38	1.79	north transitional zone	Y	Fusiform	17
Schwagerinidae Dunbar et Henbest,1930	Schwag	Parafusulina Dunbar et Skinner,1931	Parafusulina motoyoshiensis (Morikawa,1960)	Kitakami Terrane	5.52	1.81	north transitional zone	Y	Fusiform	17
Schwagerinidae Dunbar et Henbest,1930	Schwag	Parafusulina Dunbar et Skinner,1931	Parafusulina motoyoshiensis (Morikawa,1960)	Kitakami Terrane	8.55	1.94	north transitional zone	Y	Fusiform	17
Schwagerinidae Dunbar et Henbest,1930	Schwag	Parafusulina Dunbar et Skinner,1931	Parafusulina motoyoshiensis (Morikawa,1960)	Kitakami Terrane	11	2	north transitional zone	Y	Fusiform	17
Schwagerinidae Dunbar et Henbest,1930	Schwag	Parafusulina Dunbar et Skinner,1931	Parafusulina motoyoshiensis (Morikawa,1960)	Kitakami Terrane	9.66	2.12	north transitional zone	Y	Fusiform	17
Schwagerinidae Dunbar et Henbest,1930	Schwag	Parafusulina Dunbar et Skinner,1931	Parafusulina multiseptata (Schellwien,1898)	Kitakami Terrane	12.29	3.37	north transitional zone	Y	Fusiform	17
Schwagerinidae Dunbar et Henbest,1930	Schwag	Parafusulina Dunbar et Skinner,1931	Parafusulina multiseptata (Schellwien,1898)	Kitakami Terrane	8.87	3.61	north transitional zone	Y	Fusiform	17
Schwagerinidae Dunbar et Henbest,1930	Schwag	Parafusulina Dunbar et Skinner,1931	Parafusulina mccloudensis Skinner et Wilde,1965	Kitakami Terrane	14.64	3.76	north transitional zone	Y	Fusiform	17
Schwagerinidae Dunbar et Henbest,1930	Schwag	Parafusulina Dunbar et Skinner,1931	Parafusulina mccloudensis Skinner et Wilde,1965	Kitakami Terrane	11.28	3.9	north transitional zone	Y	Fusiform	17
Schwagerinidae Dunbar et Henbest,1930	Schwag	Parafusulina Dunbar et Skinner,1931	Parafusulina multiseptata (Schellwien,1898)	Kitakami Terrane	15	4.5	north transitional zone	Y	Fusiform	17
Schwagerinidae Dunbar et Henbest,1930	Schwag	Parafusulina Dunbar et Skinner,1931	Parafusulina mccloudensis Skinner et Wilde,1965	Kitakami Terrane	21	4.5	north transitional zone	Y	Fusiform	17
Schwagerinidae Dunbar et Henbest,1930	Schwag	Parafusulina Dunbar et Skinner,1931	Parafusulina gigantea (Deprat,1913)	Kitakami Terrane	17	6	north transitional zone	Y	Fusiform	17
Verbeekinidae Staff et Wedekina,1910	Verb	Pseudodoliolina Yabe et Hanzawa,1932	Pseudodoliolina elongata Choi,1970	Kitakami Terrane	6.19	1.89	north transitional zone	Y	Fusiform	17
Verbeekinidae Staff et Wedekina,1910	Verb	Pseudodoliolina Yabe et Hanzawa,1932	Pseudodoliolina kanokuraensis Choi,1973	Kitakami Terrane	5.61	3.37	north transitional zone	Y	Fusiform	17
Verbeekinidae Staff et Wedekina,1910	Verb	Pseudodoliolina Yabe et Hanzawa,1932	Pseudodoliolina kanokuraensis Choi,1973	Kitakami Terrane	9.2	4.9	north transitional zone	Y	Fusiform	17
Verbeekinidae Staff et Wedekina,1910	Verb	Pseudodoliolina Yabe et Hanzawa,1932	Pseudodoliolina gravitesta Kanmera,1954	Kitakami Terrane	8.61	5.28	north transitional zone	Y	Fusiform	17
Verbeekinidae Staff et Wedekina,1910	Verb	Pseudodoliolina Yabe et Hanzawa,1932	Pseudodoliolina gravitesta Kanmera,1954	Kitakami Terrane	10.7	5.58	north transitional zone	Y	Fusiform	17
Verbeekinidae Staff et Wedekina,1910	Verb	Pseudodoliolina Yabe et Hanzawa,1932	Pseudodoliolina gravitesta Kanmera,1954	Kitakami Terrane	16.4	6.2	north transitional zone	Y	Fusiform	17
Schubertellidae Skinner,1931	Schu	Schubertella Staff et Wedekind,1910	Schubertella irumensis (Huzimoto,1936)	Kitakami Terrane	0.98	0.6	north transitional zone	N	Fusiform	17
Schubertellidae Skinner,1931	Schu	Schubertella Staff et Wedekind,1910	Schubertella irumensis (Huzimoto,1936)	Kitakami Terrane	0.926	0.608	north transitional zone	N	Fusiform	17
Schubertellidae Skinner,1931	Schu	Schubertella Staff et Wedekind,1910	Schubertella irumensis (Huzimoto,1936)	Kitakami Terrane	0.915	0.615	north transitional zone	N	Fusiform	17
Schubertellidae Skinner,1931	Schu	Schubertella Staff et Wedekind,1910	Schubertella irumensis (Huzimoto,1936)	Kitakami Terrane	0.852	0.78	north transitional zone	N	Fusiform	17
Schubertellidae Skinner,1931	Schu	Toriyamaia Kanmera,1956	Toriyamaia laxiseptata Kanmera,1956	Kitakami Terrane	1.2	0.585	north transitional zone	N	Fusiform	17
Schubertellidae Skinner,1931	Schu	Toriyamaia Kanmera,1956	Toriyamaia laxiseptata Kanmera,1956	Kitakami Terrane	1.353	0.705	north transitional zone	N	Fusiform	17
Schubertellidae Skinner,1931	Schu	Toriyamaia Kanmera,1956	Toriyamaia laxiseptata Kanmera,1956	Kitakami Terrane	1.835	0.85	north transitional zone	N	Fusiform	17
Schubertellidae Skinner,1931	Schu	Toriyamaia Kanmera,1956	Toriyamaia laxiseptata Kanmera,1956	Kitakami Terrane	2.62	1.235	north transitional zone	N	Fusiform	17
Schubertellidae Skinner,1931	Schu	Yangchienia Lee,1933	Yangchienia kwangsiensis Chen,1956	Kitakami Terrane	1.9	1.1	north transitional zone	N	Fusiform	17
Verbeekinidae Staff et Wedekina,1910	Verb	Armenina M.-Maclay,1955	Armenina saraburiensis Toriyama et Kanmera,1975	Indochina Block	1.49	1.06	equatorial areas	Y	Fusiform	13	[14]
Verbeekinidae Staff et Wedekina,1910	Verb	Armenina M.-Maclay,1955	Armenina saraburiensis Toriyama et Kanmera,1975	Indochina Block	1.53	1.21	equatorial areas	Y	Fusiform	13
Verbeekinidae Staff et Wedekina,1910	Verb	Armenina M.-Maclay,1955	Armenina prisca Toriyama et Kanmera,1975	Indochina Block	2.05	1.31	equatorial areas	Y	Fusiform	13
Verbeekinidae Staff et Wedekina,1910	Verb	Armenina M.-Maclay,1955	Armenina saraburiensis Toriyama et Kanmera,1975	Indochina Block	2.08	1.38	equatorial areas	Y	Fusiform	13
Verbeekinidae Staff et Wedekina,1910	Verb	Armenina M.-Maclay,1955	Armenina prisca Toriyama et Kanmera,1975	Indochina Block	2.27	1.39	equatorial areas	Y	Fusiform	13
Verbeekinidae Staff et Wedekina,1910	Verb	Armenina M.-Maclay,1955	Armenina prisca Toriyama et Kanmera,1975	Indochina Block	2.06	1.41	equatorial areas	Y	Fusiform	13
Verbeekinidae Staff et Wedekina,1910	Verb	Armenina M.-Maclay,1955	Armenina saraburiensis Toriyama et Kanmera,1975	Indochina Block	1.75	1.43	equatorial areas	Y	Fusiform	13
Verbeekinidae Staff et Wedekina,1910	Verb	Armenina M.-Maclay,1955	Armenina saraburiensis Toriyama et Kanmera,1975	Indochina Block	2.07	1.45	equatorial areas	Y	Fusiform	13
Verbeekinidae Staff et Wedekina,1910	Verb	Armenina M.-Maclay,1955	Armenina prisca Toriyama et Kanmera,1975	Indochina Block	2.26	1.52	equatorial areas	Y	Fusiform	13
Verbeekinidae Staff et Wedekina,1910	Verb	Armenina M.-Maclay,1955	Armenina karinae A.D.Miklukho-Maklay, 1955	Indochina Block	2.06	1.63	equatorial areas	Y	Fusiform	13
Verbeekinidae Staff et Wedekina,1910	Verb	Armenina M.-Maclay,1955	Armenina saraburiensis Toriyama et Kanmera,1975	Indochina Block	2.26	1.79	equatorial areas	Y	Fusiform	13
Verbeekinidae Staff et Wedekina,1910	Verb	Armenina M.-Maclay,1955	Armenina prisca Toriyama et Kanmera,1975	Indochina Block	2.48	1.83	equatorial areas	Y	Fusiform	13
Verbeekinidae Staff et Wedekina,1910	Verb	Armenina M.-Maclay,1955	Armenina karinae A.D.Miklukho-Maklay, 1955	Indochina Block	2.18	1.885	equatorial areas	Y	Fusiform	13
Verbeekinidae Staff et Wedekina,1910	Verb	Armenina M.-Maclay,1955	Armenina prisca Toriyama et Kanmera,1975	Indochina Block	2.42	1.92	equatorial areas	Y	Fusiform	13
Verbeekinidae Staff et Wedekina,1910	Verb	Armenina M.-Maclay,1955	Armenina karinae A.D.Miklukho-Maklay, 1955	Indochina Block	1.82	1.99	equatorial areas	Y	Fusiform	13
Verbeekinidae Staff et Wedekina,1910	Verb	Armenina M.-Maclay,1955	Armenina karinae A.D.Miklukho-Maklay, 1955	Indochina Block	3.2	2.52	equatorial areas	Y	Fusiform	13
Schwagerinidae Dunbar et Henbest,1930	Schwag	Chusenella Hsu,1942	Chusenella tenuis Toriyama et Kanmera,1975	Indochina Block	3.2	0.78	equatorial areas	Y	Fusiform	13
Schwagerinidae Dunbar et Henbest,1930	Schwag	Chusenella Hsu,1942	Chusenella tenuis Toriyama et Kanmera,1975	Indochina Block	3.1	0.82	equatorial areas	Y	Fusiform	13
Schwagerinidae Dunbar et Henbest,1930	Schwag	Chusenella Hsu,1942	Chusenella sinensis Sheng,1963	Indochina Block	2.95	1.09	equatorial areas	Y	Fusiform	13
Schwagerinidae Dunbar et Henbest,1930	Schwag	Chusenella Hsu,1942	Chusenella sinensis Sheng,1963	Indochina Block	3.49	1.09	equatorial areas	Y	Fusiform	13
Schwagerinidae Dunbar et Henbest,1930	Schwag	Chusenella Hsu,1942	Chusenella chihsiaensis (Lee,1931)	Indochina Block	3.98	1.09	equatorial areas	Y	Fusiform	13
Schwagerinidae Dunbar et Henbest,1930	Schwag	Chusenella Hsu,1942	Chusenella sinensis Sheng,1963	Indochina Block	3.9	1.14	equatorial areas	Y	Fusiform	13
Schwagerinidae Dunbar et Henbest,1930	Schwag	Chusenella Hsu,1942	Chusenella tenuis Toriyama et Kanmera,1975	Indochina Block	6.17	1.28	equatorial areas	Y	Fusiform	13
Schwagerinidae Dunbar et Henbest,1930	Schwag	Chusenella Hsu,1942	Chusenella tenuis Toriyama et Kanmera,1975	Indochina Block	5.28	1.3	equatorial areas	Y	Fusiform	13
Schwagerinidae Dunbar et Henbest,1930	Schwag	Chusenella Hsu,1942	Chusenella tenuis Toriyama et Kanmera,1975	Indochina Block	6.29	1.4	equatorial areas	Y	Fusiform	13
Schwagerinidae Dunbar et Henbest,1930	Schwag	Chusenella Hsu,1942	Chusenella cheni Skinner and Wilde, 1966	Indochina Block	3.6	1.52	equatorial areas	Y	Fusiform	13
Schwagerinidae Dunbar et Henbest,1930	Schwag	Chusenella Hsu,1942	Chusenella cheni Skinner and Wilde, 1966	Indochina Block	3.8	1.6	equatorial areas	Y	Fusiform	13
Schwagerinidae Dunbar et Henbest,1930	Schwag	Chusenella Hsu,1942	Chusenella chihsiaensis (Lee,1931)	Indochina Block	5.6	1.6	equatorial areas	Y	Fusiform	13
Schwagerinidae Dunbar et Henbest,1930	Schwag	Chusenella Hsu,1942	Chusenella chihsiaensis (Lee,1931)	Indochina Block	5.44	1.64	equatorial areas	Y	Fusiform	13
Schwagerinidae Dunbar et Henbest,1930	Schwag	Chusenella Hsu,1942	Chusenella cheni Skinner and Wilde, 1966	Indochina Block	3.8	1.75	equatorial areas	Y	Fusiform	13
Schwagerinidae Dunbar et Henbest,1930	Schwag	Chusenella Hsu,1942	Chusenella cheni Skinner and Wilde, 1966	Indochina Block	4.2	1.75	equatorial areas	Y	Fusiform	13
Schwagerinidae Dunbar et Henbest,1930	Schwag	Chusenella Hsu,1942	Chusenella chihsiaensis (Lee,1931)	Indochina Block	6.09	1.75	equatorial areas	Y	Fusiform	13
Schwagerinidae Dunbar et Henbest,1930	Schwag	Chusenella Hsu,1942	Chusenella chihsiaensis (Lee,1931)	Indochina Block	6.35	1.83	equatorial areas	Y	Fusiform	13
Schwagerinidae Dunbar et Henbest,1930	Schwag	Chusenella Hsu,1942	Chusenella chihsiaensis (Lee,1931)	Indochina Block	6.37	1.83	equatorial areas	Y	Fusiform	13
Schwagerinidae Dunbar et Henbest,1930	Schwag	Chusenella Hsu,1942	Chusenella chihsiaensis (Lee,1931)	Indochina Block	6.58	1.83	equatorial areas	Y	Fusiform	13
Schwagerinidae Dunbar et Henbest,1930	Schwag	Chusenella Hsu,1942	Chusenella schwagerinaeformis Sheng,1963	Indochina Block	4.67	2.17	equatorial areas	Y	Fusiform	13
Schwagerinidae Dunbar et Henbest,1930	Schwag	Chusenella Hsu,1942	Chusenella schwagerinaeformis Sheng,1963	Indochina Block	6.15	2.38	equatorial areas	Y	Fusiform	13
Schwagerinidae Dunbar et Henbest,1930	Schwag	Chusenella Hsu,1942	Chusenella alpina (Kochansky-Devide and Ramovs, 1955)	Indochina Block	4.33	2.77	equatorial areas	Y	Fusiform	13
Schwagerinidae Dunbar et Henbest,1930	Schwag	Chusenella Hsu,1942	Chusenella alpina (Kochansky-Devide and Ramovs, 1955)	Indochina Block	5.2	2.79	equatorial areas	Y	Fusiform	13
Neoschwagerinidae Dunbar et Condra,1927	Neo	Colania Lee,1933	Colania douvillei (Ozawa, 1925)	Indochina Block	3.58	1.79	equatorial areas	Y	Fusiform	13
Neoschwagerinidae Dunbar et Condra,1927	Neo	Colania Lee,1933	Colania douvillei (Ozawa, 1925)	Indochina Block	3.9	1.95	equatorial areas	Y	Fusiform	13
Neoschwagerinidae Dunbar et Condra,1927	Neo	Colania Lee,1933	Colania douvillei (Ozawa, 1925)	Indochina Block	5.73	2.64	equatorial areas	Y	Fusiform	13
Neoschwagerinidae Dunbar et Condra,1927	Neo	Colania Lee,1933	Colania douvillei (Ozawa, 1925)	Indochina Block	6.01	2.84	equatorial areas	Y	Fusiform	13
Verbeekinidae Staff et Wedekina,1910	Verb	Metadoliolina Ishii et Nogami,1961	Metadoliolina pulchra (Sheng,1963)	Indochina Block	2.78	1.57	equatorial areas	Y	Fusiform	13
Verbeekinidae Staff et Wedekina,1910	Verb	Metadoliolina Ishii et Nogami,1961	Metadoliolina pulchra (Sheng,1963)	Indochina Block	3.01	1.6	equatorial areas	Y	Fusiform	13
Verbeekinidae Staff et Wedekina,1910	Verb	Metadoliolina Ishii et Nogami,1961	Metadoliolina pulchra (Sheng,1963)	Indochina Block	2.84	1.99	equatorial areas	Y	Fusiform	13
Verbeekinidae Staff et Wedekina,1910	Verb	Metadoliolina Ishii et Nogami,1961	Metadoliolina pulchra (Sheng,1963)	Indochina Block	3.29	1.99	equatorial areas	Y	Fusiform	13
Neoschwagerinidae Dunbar et Condra,1927	Neo	Neoschwagerina Yabe,1903	Neoschwagerina schuberti Kochansky-Devide, 1958	Indochina Block	1.92	1	equatorial areas	Y	Fusiform	13
Neoschwagerinidae Dunbar et Condra,1927	Neo	Neoschwagerina Yabe,1903	Neoschwagerina schuberti Kochansky-Devide, 1958	Indochina Block	2.48	1.54	equatorial areas	Y	Fusiform	13
Neoschwagerinidae Dunbar et Condra,1927	Neo	Neoschwagerina Yabe,1903	Neoschwagerina schuberti Kochansky-Devide, 1958	Indochina Block	3.05	1.58	equatorial areas	Y	Fusiform	13
Neoschwagerinidae Dunbar et Condra,1927	Neo	Neoschwagerina Yabe,1903	Neoschwagerina tenuis Toriyama and Kanmera, 1975	Indochina Block	3.49	1.58	equatorial areas	Y	Fusiform	13
Neoschwagerinidae Dunbar et Condra,1927	Neo	Neoschwagerina Yabe,1903	Neoschwagerina schuberti Kochansky-Devide, 1958	Indochina Block	3.1	1.62	equatorial areas	Y	Fusiform	13
Neoschwagerinidae Dunbar et Condra,1927	Neo	Neoschwagerina Yabe,1903	Neoschwagerina schuberti Kochansky-Devide, 1958	Indochina Block	2.68	1.67	equatorial areas	Y	Fusiform	13
Neoschwagerinidae Dunbar et Condra,1927	Neo	Neoschwagerina Yabe,1903	Neoschwagerina schuberti Kochansky-Devide, 1958	Indochina Block	2.99	1.68	equatorial areas	Y	Fusiform	13
Neoschwagerinidae Dunbar et Condra,1927	Neo	Neoschwagerina Yabe,1903	Neoschwagerina schuberti Kochansky-Devide, 1958	Indochina Block	3.09	1.68	equatorial areas	Y	Fusiform	13
Neoschwagerinidae Dunbar et Condra,1927	Neo	Neoschwagerina Yabe,1903	Neoschwagerina tenuis Toriyama and Kanmera, 1975	Indochina Block	3.45	1.68	equatorial areas	Y	Fusiform	13
Neoschwagerinidae Dunbar et Condra,1927	Neo	Neoschwagerina Yabe,1903	Neoschwagerina tenuis Toriyama and Kanmera, 1975	Indochina Block	3.29	1.71	equatorial areas	Y	Fusiform	13
Neoschwagerinidae Dunbar et Condra,1927	Neo	Neoschwagerina Yabe,1903	Neoschwagerina tenuis Toriyama and Kanmera, 1975	Indochina Block	3.37	1.71	equatorial areas	Y	Fusiform	13
Neoschwagerinidae Dunbar et Condra,1927	Neo	Neoschwagerina Yabe,1903	Neoschwagerina schuberti Kochansky-Devide, 1958	Indochina Block	2.68	1.75	equatorial areas	Y	Fusiform	13
Neoschwagerinidae Dunbar et Condra,1927	Neo	Neoschwagerina Yabe,1903	Neoschwagerina simplex Ozawa,1927	Indochina Block	2.72	1.78	equatorial areas	Y	Fusiform	13
Neoschwagerinidae Dunbar et Condra,1927	Neo	Neoschwagerina Yabe,1903	Neoschwagerina simplex Ozawa,1927	Indochina Block	2	1.79	equatorial areas	Y	Fusiform	13
Neoschwagerinidae Dunbar et Condra,1927	Neo	Neoschwagerina Yabe,1903	Neoschwagerina tenuis Toriyama and Kanmera, 1975	Indochina Block	3.17	1.91	equatorial areas	Y	Fusiform	13
Neoschwagerinidae Dunbar et Condra,1927	Neo	Neoschwagerina Yabe,1903	Neoschwagerina tenuis Toriyama and Kanmera, 1975	Indochina Block	3.9	1.95	equatorial areas	Y	Fusiform	13
Neoschwagerinidae Dunbar et Condra,1927	Neo	Neoschwagerina Yabe,1903	Neoschwagerina schuberti Kochansky-Devide, 1958	Indochina Block	3.13	1.97	equatorial areas	Y	Fusiform	13
Neoschwagerinidae Dunbar et Condra,1927	Neo	Neoschwagerina Yabe,1903	Neoschwagerina tenuis Toriyama and Kanmera, 1975	Indochina Block	3.65	2	equatorial areas	Y	Fusiform	13
Neoschwagerinidae Dunbar et Condra,1927	Neo	Neoschwagerina Yabe,1903	Neoschwagerina simplex Ozawa,1927	Indochina Block	2.52	2.03	equatorial areas	Y	Fusiform	13
Neoschwagerinidae Dunbar et Condra,1927	Neo	Neoschwagerina Yabe,1903	Neoschwagerina simplex Ozawa,1927	Indochina Block	2.88	2.07	equatorial areas	Y	Fusiform	13
Neoschwagerinidae Dunbar et Condra,1927	Neo	Neoschwagerina Yabe,1903	Neoschwagerina tenuis Toriyama and Kanmera, 1975	Indochina Block	3.9	2.15	equatorial areas	Y	Fusiform	13
Neoschwagerinidae Dunbar et Condra,1927	Neo	Neoschwagerina Yabe,1903	Neoschwagerina simplex Ozawa,1927	Indochina Block	2.68	2.19	equatorial areas	Y	Fusiform	13
Neoschwagerinidae Dunbar et Condra,1927	Neo	Neoschwagerina Yabe,1903	Neoschwagerina tenuis Toriyama and Kanmera, 1975	Indochina Block	3.9	2.19	equatorial areas	Y	Fusiform	13
Neoschwagerinidae Dunbar et Condra,1927	Neo	Neoschwagerina Yabe,1903	Neoschwagerina simplex Ozawa,1927	Indochina Block	3.41	2.2	equatorial areas	Y	Fusiform	13
Neoschwagerinidae Dunbar et Condra,1927	Neo	Neoschwagerina Yabe,1903	Neoschwagerina simplex Ozawa,1927	Indochina Block	3.41	2.31	equatorial areas	Y	Fusiform	13
Neoschwagerinidae Dunbar et Condra,1927	Neo	Neoschwagerina Yabe,1903	Neoschwagerina simplex Ozawa,1927	Indochina Block	2.46	2.36	equatorial areas	Y	Fusiform	13
Neoschwagerinidae Dunbar et Condra,1927	Neo	Neoschwagerina Yabe,1903	Neoschwagerina simplex Ozawa,1927	Indochina Block	3.13	2.44	equatorial areas	Y	Fusiform	13
Neoschwagerinidae Dunbar et Condra,1927	Neo	Neoschwagerina Yabe,1903	Neoschwagerina simplex Ozawa,1927	Indochina Block	3.21	2.63	equatorial areas	Y	Fusiform	13
Neoschwagerinidae Dunbar et Condra,1927	Neo	Neoschwagerina Yabe,1903	Neoschwagerina simplex Ozawa,1927	Indochina Block	3.49	2.72	equatorial areas	Y	Fusiform	13
Neoschwagerinidae Dunbar et Condra,1927	Neo	Neoschwagerina Yabe,1903	Neoschwagerina simplex Ozawa,1927	Indochina Block	2.3	2.82	equatorial areas	Y	Fusiform	13
Neoschwagerinidae Dunbar et Condra,1927	Neo	Neoschwagerina Yabe,1903	Neoschwagerina simplex Ozawa,1927	Indochina Block	4.26	2.84	equatorial areas	Y	Fusiform	13
Ozawainellidae Thompson et Foster,1937	Oza	Ozawainella Thompson,1935	Ozawainella akiyoshiensis Toriyama	Indochina Block	0.84	1.84	equatorial areas	N	Lenticular	13
Schwagerinidae Dunbar et Henbest,1930	Schwag	Parafusulina Dunbar et Skinner,1931	Parafusulina granumavenae (Roemer,1880)	Indochina Block	7.84	1.54	equatorial areas	Y	Fusiform	13
Schwagerinidae Dunbar et Henbest,1930	Schwag	Parafusulina Dunbar et Skinner,1931	Parafusulina granumavenae (Roemer,1880)	Indochina Block	8.04	1.63	equatorial areas	Y	Fusiform	13
Schwagerinidae Dunbar et Henbest,1930	Schwag	Parafusulina Dunbar et Skinner,1931	Parafusulina granumavenae (Roemer,1880)	Indochina Block	7.11	1.7	equatorial areas	Y	Fusiform	13
Schwagerinidae Dunbar et Henbest,1930	Schwag	Parafusulina Dunbar et Skinner,1931	Parafusulina nosonensis Thompson and Wheeler, 1946	Indochina Block	10.92	1.74	equatorial areas	Y	Fusiform	13
Schwagerinidae Dunbar et Henbest,1930	Schwag	Parafusulina Dunbar et Skinner,1931	Parafusulina kaerimizensis (Ozawa, 1925)	Indochina Block	7.3	1.75	equatorial areas	Y	Fusiform	13
Schwagerinidae Dunbar et Henbest,1930	Schwag	Parafusulina Dunbar et Skinner,1931	Parafusulina granumavenae (Roemer,1880)	Indochina Block	9.83	1.8	equatorial areas	Y	Fusiform	13
Schwagerinidae Dunbar et Henbest,1930	Schwag	Parafusulina Dunbar et Skinner,1931	Parafusulina granumavenae (Roemer,1880)	Indochina Block	9.34	2.03	equatorial areas	Y	Fusiform	13
Schwagerinidae Dunbar et Henbest,1930	Schwag	Parafusulina Dunbar et Skinner,1931	Parafusulina granumavenae (Roemer,1880)	Indochina Block	9.05	2.07	equatorial areas	Y	Fusiform	13
Schwagerinidae Dunbar et Henbest,1930	Schwag	Parafusulina Dunbar et Skinner,1931	Parafusulina granumavenae (Roemer,1880)	Indochina Block	9.95	2.2	equatorial areas	Y	Fusiform	13
Schwagerinidae Dunbar et Henbest,1930	Schwag	Parafusulina Dunbar et Skinner,1931	Parafusulina nosonensis Thompson and Wheeler, 1946	Indochina Block	12.05	2.4	equatorial areas	Y	Fusiform	13
Schwagerinidae Dunbar et Henbest,1930	Schwag	Parafusulina Dunbar et Skinner,1931	Parafusulina japonica (Gumbel, 1883)	Indochina Block	9.4	2.42	equatorial areas	Y	Fusiform	13
Schwagerinidae Dunbar et Henbest,1930	Schwag	Parafusulina Dunbar et Skinner,1931	Parafusulina elliptica Sheng,1963	Indochina Block	6.05	2.48	equatorial areas	Y	Fusiform	13
Schwagerinidae Dunbar et Henbest,1930	Schwag	Parafusulina Dunbar et Skinner,1931	Parafusulina kaerimizensis (Ozawa, 1925)	Indochina Block	9.73	2.48	equatorial areas	Y	Fusiform	13
Schwagerinidae Dunbar et Henbest,1930	Schwag	Parafusulina Dunbar et Skinner,1931	Parafusulina nosonensis Thompson and Wheeler, 1946	Indochina Block	17.1	2.52	equatorial areas	Y	Fusiform	13
Schwagerinidae Dunbar et Henbest,1930	Schwag	Parafusulina Dunbar et Skinner,1931	Parafusulina granumavenae (Roemer,1880)	Indochina Block	9.42	2.56	equatorial areas	Y	Fusiform	13
Schwagerinidae Dunbar et Henbest,1930	Schwag	Parafusulina Dunbar et Skinner,1931	Parafusulina yabei Hanzawa, 1942	Indochina Block	6.67	2.6	equatorial areas	Y	Fusiform	13
Schwagerinidae Dunbar et Henbest,1930	Schwag	Parafusulina Dunbar et Skinner,1931	Parafusulina nosonensis Thompson and Wheeler, 1946	Indochina Block	15.67	2.6	equatorial areas	Y	Fusiform	13
Schwagerinidae Dunbar et Henbest,1930	Schwag	Parafusulina Dunbar et Skinner,1931	Parafusulina elliptica Sheng,1963	Indochina Block	6.33	2.65	equatorial areas	Y	Fusiform	13
Schwagerinidae Dunbar et Henbest,1930	Schwag	Parafusulina Dunbar et Skinner,1931	Parafusulina nosonensis Thompson and Wheeler, 1946	Indochina Block	15.55	2.65	equatorial areas	Y	Fusiform	13
Schwagerinidae Dunbar et Henbest,1930	Schwag	Parafusulina Dunbar et Skinner,1931	Parafusulina kaerimizensis (Ozawa, 1925)	Indochina Block	11.25	2.68	equatorial areas	Y	Fusiform	13
Schwagerinidae Dunbar et Henbest,1930	Schwag	Parafusulina Dunbar et Skinner,1931	Parafusulina japonica (Gumbel, 1883)	Indochina Block	10	2.72	equatorial areas	Y	Fusiform	13
Schwagerinidae Dunbar et Henbest,1930	Schwag	Parafusulina Dunbar et Skinner,1931	Parafusulina gruperaensis (Thompson et Miller,1945)	Indochina Block	7.8	2.8	equatorial areas	Y	Fusiform	13
Schwagerinidae Dunbar et Henbest,1930	Schwag	Parafusulina Dunbar et Skinner,1931	Parafusulina sapperi (Staff,1912)	Indochina Block	9.45	2.87	equatorial areas	Y	Fusiform	13
Schwagerinidae Dunbar et Henbest,1930	Schwag	Parafusulina Dunbar et Skinner,1931	Parafusulina granumavenae (Roemer,1880)	Indochina Block	12.99	2.88	equatorial areas	Y	Fusiform	13
Schwagerinidae Dunbar et Henbest,1930	Schwag	Parafusulina Dunbar et Skinner,1931	Parafusulina granumavenae (Roemer,1880)	Indochina Block	15.67	2.88	equatorial areas	Y	Fusiform	13
Schwagerinidae Dunbar et Henbest,1930	Schwag	Parafusulina Dunbar et Skinner,1931	Parafusulina gruperaensis (Thompson et Miller,1945)	Indochina Block	8.8	2.95	equatorial areas	Y	Fusiform	13
Schwagerinidae Dunbar et Henbest,1930	Schwag	Parafusulina Dunbar et Skinner,1931	Parafusulina yabei Hanzawa, 1942	Indochina Block	8.58	2.98	equatorial areas	Y	Fusiform	13
Schwagerinidae Dunbar et Henbest,1930	Schwag	Parafusulina Dunbar et Skinner,1931	Parafusulina japonica (Gumbel, 1883)	Indochina Block	11.15	3	equatorial areas	Y	Fusiform	13
Schwagerinidae Dunbar et Henbest,1930	Schwag	Parafusulina Dunbar et Skinner,1931	Parafusulina kaerimizensis (Ozawa, 1925)	Indochina Block	12.59	3	equatorial areas	Y	Fusiform	13
Schwagerinidae Dunbar et Henbest,1930	Schwag	Parafusulina Dunbar et Skinner,1931	Parafusulina gruperanensis brevica Sheng,1963	Indochina Block	3.33	3.03	equatorial areas	Y	Fusiform	13
Schwagerinidae Dunbar et Henbest,1930	Schwag	Parafusulina Dunbar et Skinner,1931	Parafusulina elliptica Sheng,1963	Indochina Block	5.68	3.09	equatorial areas	Y	Fusiform	13
Schwagerinidae Dunbar et Henbest,1930	Schwag	Parafusulina Dunbar et Skinner,1931	Parafusulina elliptica Sheng,1963	Indochina Block	6.6	3.09	equatorial areas	Y	Fusiform	13
Schwagerinidae Dunbar et Henbest,1930	Schwag	Parafusulina Dunbar et Skinner,1931	Parafusulina japonica (Gumbel, 1883)	Indochina Block	11.53	3.15	equatorial areas	Y	Fusiform	13
Schwagerinidae Dunbar et Henbest,1930	Schwag	Parafusulina Dunbar et Skinner,1931	Parafusulina japonica (Gumbel, 1883)	Indochina Block	11.3	3.2	equatorial areas	Y	Fusiform	13
Schwagerinidae Dunbar et Henbest,1930	Schwag	Parafusulina Dunbar et Skinner,1931	Parafusulina japonica (Gumbel, 1883)	Indochina Block	11.12	3.33	equatorial areas	Y	Fusiform	13
Schwagerinidae Dunbar et Henbest,1930	Schwag	Parafusulina Dunbar et Skinner,1931	Parafusulina japonica (Gumbel, 1883)	Indochina Block	11.96	3.33	equatorial areas	Y	Fusiform	13
Schwagerinidae Dunbar et Henbest,1930	Schwag	Parafusulina Dunbar et Skinner,1931	Parafusulina quasigruperaensis Sheng,1963	Indochina Block	10	3.34	equatorial areas	Y	Fusiform	13
Schwagerinidae Dunbar et Henbest,1930	Schwag	Parafusulina Dunbar et Skinner,1931	Parafusulina gruperaensis (Thompson et Miller,1945)	Indochina Block	10	3.35	equatorial areas	Y	Fusiform	13
Schwagerinidae Dunbar et Henbest,1930	Schwag	Parafusulina Dunbar et Skinner,1931	Parafusulina kaerimizensis (Ozawa, 1925)	Indochina Block	14.2	3.37	equatorial areas	Y	Fusiform	13
Schwagerinidae Dunbar et Henbest,1930	Schwag	Parafusulina Dunbar et Skinner,1931	Parafusulina gruperaensis (Thompson et Miller,1945)	Indochina Block	9.1	3.4	equatorial areas	Y	Fusiform	13
Schwagerinidae Dunbar et Henbest,1930	Schwag	Parafusulina Dunbar et Skinner,1931	Parafusulina sapperi (Staff,1912)	Indochina Block	11.19	3.4	equatorial areas	Y	Fusiform	13
Schwagerinidae Dunbar et Henbest,1930	Schwag	Parafusulina Dunbar et Skinner,1931	Parafusulina yabei Hanzawa, 1942	Indochina Block	8.34	3.49	equatorial areas	Y	Fusiform	13
Schwagerinidae Dunbar et Henbest,1930	Schwag	Parafusulina Dunbar et Skinner,1931	Parafusulina sapperi (Staff,1912)	Indochina Block	13.07	3.54	equatorial areas	Y	Fusiform	13
Schwagerinidae Dunbar et Henbest,1930	Schwag	Parafusulina Dunbar et Skinner,1931	Parafusulina quasigruperaensis Sheng,1963	Indochina Block	8.2	4.05	equatorial areas	Y	Fusiform	13
Schwagerinidae Dunbar et Henbest,1930	Schwag	Parafusulina Dunbar et Skinner,1931	Parafusulina yabei Hanzawa, 1942	Indochina Block	9.62	4.26	equatorial areas	Y	Fusiform	13
Verbeekinidae Staff et Wedekina,1910	Verb	Paraverbeekina M.-Maclay,1955	Paraverbeekina pontica M.-Maclay,1955	Indochina Block	5.2	3.94	equatorial areas	Y	Fusiform	13
Verbeekinidae Staff et Wedekina,1910	Verb	Paraverbeekina M.-Maclay,1955	Paraverbeekina pontica M.-Maclay,1955	Indochina Block	4.63	3.97	equatorial areas	Y	Fusiform	13
Neoschwagerinidae Dunbar et Condra,1927	Neo	Presumatrina Toumanskaya,1950	Presumatrina schellwieni (Deprat,1913)	Indochina Block	3.25	1.23	equatorial areas	Y	Fusiform	13
Neoschwagerinidae Dunbar et Condra,1927	Neo	Presumatrina Toumanskaya,1950	Presumatrina grandis Leven, 1967	Indochina Block	1.84	1.3	equatorial areas	Y	Fusiform	13
Neoschwagerinidae Dunbar et Condra,1927	Neo	Presumatrina Toumanskaya,1950	Presumatrina schellwieni (Deprat,1913)	Indochina Block	3.25	1.31	equatorial areas	Y	Fusiform	13
Neoschwagerinidae Dunbar et Condra,1927	Neo	Presumatrina Toumanskaya,1950	Presumatrina schellwieni (Deprat,1913)	Indochina Block	3.5	1.31	equatorial areas	Y	Fusiform	13
Neoschwagerinidae Dunbar et Condra,1927	Neo	Presumatrina Toumanskaya,1950	Presumatrina schellwieni (Deprat,1913)	Indochina Block	2.86	1.36	equatorial areas	Y	Fusiform	13
Neoschwagerinidae Dunbar et Condra,1927	Neo	Presumatrina Toumanskaya,1950	Presumatrina schellwieni (Deprat,1913)	Indochina Block	3.17	1.38	equatorial areas	Y	Fusiform	13
Neoschwagerinidae Dunbar et Condra,1927	Neo	Presumatrina Toumanskaya,1950	Presumatrina schellwieni (Deprat,1913)	Indochina Block	2.88	1.39	equatorial areas	Y	Fusiform	13
Neoschwagerinidae Dunbar et Condra,1927	Neo	Presumatrina Toumanskaya,1950	Presumatrina schellwieni (Deprat,1913)	Indochina Block	3.47	1.42	equatorial areas	Y	Fusiform	13
Neoschwagerinidae Dunbar et Condra,1927	Neo	Presumatrina Toumanskaya,1950	Presumatrina grandis Leven, 1967	Indochina Block	2.68	1.5	equatorial areas	Y	Fusiform	13
Neoschwagerinidae Dunbar et Condra,1927	Neo	Presumatrina Toumanskaya,1950	Presumatrina schellwieni (Deprat,1913)	Indochina Block	2.76	1.5	equatorial areas	Y	Fusiform	13
Neoschwagerinidae Dunbar et Condra,1927	Neo	Presumatrina Toumanskaya,1950	Presumatrina grandis Leven, 1967	Indochina Block	3.2	1.6	equatorial areas	Y	Fusiform	13
Neoschwagerinidae Dunbar et Condra,1927	Neo	Presumatrina Toumanskaya,1950	Presumatrina schellwieni (Deprat,1913)	Indochina Block	3.09	1.62	equatorial areas	Y	Fusiform	13
Neoschwagerinidae Dunbar et Condra,1927	Neo	Presumatrina Toumanskaya,1950	Presumatrina grandis Leven, 1967	Indochina Block	2.46	1.63	equatorial areas	Y	Fusiform	13
Neoschwagerinidae Dunbar et Condra,1927	Neo	Presumatrina Toumanskaya,1950	Presumatrina schellwieni (Deprat,1913)	Indochina Block	2.94	1.66	equatorial areas	Y	Fusiform	13
Neoschwagerinidae Dunbar et Condra,1927	Neo	Presumatrina Toumanskaya,1950	Presumatrina grandis Leven, 1967	Indochina Block	2.56	1.67	equatorial areas	Y	Fusiform	13
Neoschwagerinidae Dunbar et Condra,1927	Neo	Presumatrina Toumanskaya,1950	Presumatrina schellwieni (Deprat,1913)	Indochina Block	3.7	1.7	equatorial areas	Y	Fusiform	13
Neoschwagerinidae Dunbar et Condra,1927	Neo	Presumatrina Toumanskaya,1950	Presumatrina grandis Leven, 1967	Indochina Block	3.28	1.89	equatorial areas	Y	Fusiform	13
Neoschwagerinidae Dunbar et Condra,1927	Neo	Presumatrina Toumanskaya,1950	Presumatrina grandis Leven, 1967	Indochina Block	2.59	1.92	equatorial areas	Y	Fusiform	13
Verbeekinidae Staff et Wedekina,1910	Verb	Pseudodoliolina Yabe et Hanzawa,1932	Pseudodoliolina gracilis Toriyama et Kanmera,1975	Indochina Block	2.67	0.6	equatorial areas	Y	Fusiform	13
Verbeekinidae Staff et Wedekina,1910	Verb	Pseudodoliolina Yabe et Hanzawa,1932	Pseudodoliolina gracilis Toriyama et Kanmera,1975	Indochina Block	2.45	0.67	equatorial areas	Y	Fusiform	13
Verbeekinidae Staff et Wedekina,1910	Verb	Pseudodoliolina Yabe et Hanzawa,1932	Pseudodoliolina primigena Toriyama et Kanmera,1975	Indochina Block	2.67	0.77	equatorial areas	Y	Fusiform	13
Verbeekinidae Staff et Wedekina,1910	Verb	Pseudodoliolina Yabe et Hanzawa,1932	Pseudodoliolina primigena Toriyama et Kanmera,1975	Indochina Block	1.95	0.8	equatorial areas	Y	Fusiform	13
Verbeekinidae Staff et Wedekina,1910	Verb	Pseudodoliolina Yabe et Hanzawa,1932	Pseudodoliolina gracilis Toriyama et Kanmera,1975	Indochina Block	3.7	0.85	equatorial areas	Y	Fusiform	13
Verbeekinidae Staff et Wedekina,1910	Verb	Pseudodoliolina Yabe et Hanzawa,1932	Pseudodoliolina primigena Toriyama et Kanmera,1975	Indochina Block	2.66	0.86	equatorial areas	Y	Fusiform	13
Verbeekinidae Staff et Wedekina,1910	Verb	Pseudodoliolina Yabe et Hanzawa,1932	Pseudodoliolina gracilis Toriyama et Kanmera,1975	Indochina Block	2.85	0.96	equatorial areas	Y	Fusiform	13
Verbeekinidae Staff et Wedekina,1910	Verb	Pseudodoliolina Yabe et Hanzawa,1932	Pseudodoliolina saraburiensis Toriyama et Kanmera,1975	Indochina Block	2.18	0.98	equatorial areas	Y	Fusiform	13
Verbeekinidae Staff et Wedekina,1910	Verb	Pseudodoliolina Yabe et Hanzawa,1932	Pseudodoliolina primigena Toriyama et Kanmera,1975	Indochina Block	2.75	1	equatorial areas	Y	Fusiform	13
Verbeekinidae Staff et Wedekina,1910	Verb	Pseudodoliolina Yabe et Hanzawa,1932	Pseudodoliolina primigena Toriyama et Kanmera,1975	Indochina Block	2.76	1	equatorial areas	Y	Fusiform	13
Verbeekinidae Staff et Wedekina,1910	Verb	Pseudodoliolina Yabe et Hanzawa,1932	Pseudodoliolina primigena Toriyama et Kanmera,1975	Indochina Block	2.86	1.01	equatorial areas	Y	Fusiform	13
Verbeekinidae Staff et Wedekina,1910	Verb	Pseudodoliolina Yabe et Hanzawa,1932	Pseudodoliolina gracilis Toriyama et Kanmera,1975	Indochina Block	3.53	1.02	equatorial areas	Y	Fusiform	13
Verbeekinidae Staff et Wedekina,1910	Verb	Pseudodoliolina Yabe et Hanzawa,1932	Pseudodoliolina saraburiensis Toriyama et Kanmera,1975	Indochina Block	2.02	1.06	equatorial areas	Y	Fusiform	13
Verbeekinidae Staff et Wedekina,1910	Verb	Pseudodoliolina Yabe et Hanzawa,1932	Pseudodoliolina primigena Toriyama et Kanmera,1975	Indochina Block	3.2	1.09	equatorial areas	Y	Fusiform	13
Verbeekinidae Staff et Wedekina,1910	Verb	Pseudodoliolina Yabe et Hanzawa,1932	Pseudodoliolina gracilis Toriyama et Kanmera,1975	Indochina Block	4.06	1.13	equatorial areas	Y	Fusiform	13
Verbeekinidae Staff et Wedekina,1910	Verb	Pseudodoliolina Yabe et Hanzawa,1932	Pseudodoliolina saraburiensis Toriyama et Kanmera,1975	Indochina Block	2.52	1.14	equatorial areas	Y	Fusiform	13
Verbeekinidae Staff et Wedekina,1910	Verb	Pseudodoliolina Yabe et Hanzawa,1932	Pseudodoliolina saraburiensis Toriyama et Kanmera,1975	Indochina Block	2.5	1.19	equatorial areas	Y	Fusiform	13
Verbeekinidae Staff et Wedekina,1910	Verb	Pseudodoliolina Yabe et Hanzawa,1932	Pseudodoliolina saraburiensis Toriyama et Kanmera,1975	Indochina Block	2.16	1.2	equatorial areas	Y	Fusiform	13
Verbeekinidae Staff et Wedekina,1910	Verb	Pseudodoliolina Yabe et Hanzawa,1932	Pseudodoliolina saraburiensis Toriyama et Kanmera,1975	Indochina Block	2.8	1.23	equatorial areas	Y	Fusiform	13
Verbeekinidae Staff et Wedekina,1910	Verb	Pseudodoliolina Yabe et Hanzawa,1932	Pseudodoliolina saraburiensis Toriyama et Kanmera,1975	Indochina Block	2.4	1.25	equatorial areas	Y	Fusiform	13
Verbeekinidae Staff et Wedekina,1910	Verb	Pseudodoliolina Yabe et Hanzawa,1932	Pseudodoliolina ozawai minima M.Maclay,1957	Indochina Block	3.44	1.34	equatorial areas	Y	Fusiform	13
Verbeekinidae Staff et Wedekina,1910	Verb	Pseudodoliolina Yabe et Hanzawa,1932	Pseudodoliolina ozawai minima M.Maclay,1957	Indochina Block	4.08	1.36	equatorial areas	Y	Fusiform	13
Verbeekinidae Staff et Wedekina,1910	Verb	Pseudodoliolina Yabe et Hanzawa,1932	Pseudodoliolina ozawai minima M.Maclay,1957	Indochina Block	3.77	1.38	equatorial areas	Y	Fusiform	13
Verbeekinidae Staff et Wedekina,1910	Verb	Pseudodoliolina Yabe et Hanzawa,1932	Pseudodoliolina saraburiensis Toriyama et Kanmera,1975	Indochina Block	2.18	1.39	equatorial areas	Y	Fusiform	13
Verbeekinidae Staff et Wedekina,1910	Verb	Pseudodoliolina Yabe et Hanzawa,1932	Pseudodoliolina primigena Toriyama et Kanmera,1975	Indochina Block	3.2	1.41	equatorial areas	Y	Fusiform	13
Verbeekinidae Staff et Wedekina,1910	Verb	Pseudodoliolina Yabe et Hanzawa,1932	Pseudodoliolina ozawai minima M.Maclay,1957	Indochina Block	3.36	1.49	equatorial areas	Y	Fusiform	13
Verbeekinidae Staff et Wedekina,1910	Verb	Pseudodoliolina Yabe et Hanzawa,1932	Pseudodoliolina ozawai Yabe et Hanzawa,1932	Indochina Block	3.74	1.54	equatorial areas	Y	Fusiform	13
Verbeekinidae Staff et Wedekina,1910	Verb	Pseudodoliolina Yabe et Hanzawa,1932	Pseudodoliolina ozawai Yabe et Hanzawa,1932	Indochina Block	4.43	1.65	equatorial areas	Y	Fusiform	13
Verbeekinidae Staff et Wedekina,1910	Verb	Pseudodoliolina Yabe et Hanzawa,1932	Pseudodoliolina ozawai Yabe et Hanzawa,1932	Indochina Block	4.14	1.79	equatorial areas	Y	Fusiform	13
Verbeekinidae Staff et Wedekina,1910	Verb	Pseudodoliolina Yabe et Hanzawa,1932	Pseudodoliolina ozawai Yabe et Hanzawa,1932	Indochina Block	4.3	2.07	equatorial areas	Y	Fusiform	13
Schwagerinidae Dunbar et Henbest,1930	Schwag	Pseudofusulina Dunbar et Skinner,1931	Pseudofusulina ciwuensis Zhang,1982	Indochina Block	7.65	1.45	equatorial areas	Y	Fusiform	13
Schwagerinidae Dunbar et Henbest,1930	Schwag	Pseudofusulina Dunbar et Skinner,1931	Pseudofusulina ciwuensis Zhang,1982	Indochina Block	10.15	1.45	equatorial areas	Y	Fusiform	13
Schwagerinidae Dunbar et Henbest,1930	Schwag	Pseudofusulina Dunbar et Skinner,1931	Pseudofusulina ciwuensis Zhang,1982	Indochina Block	6.62	1.48	equatorial areas	Y	Fusiform	13
Schwagerinidae Dunbar et Henbest,1930	Schwag	Pseudofusulina Dunbar et Skinner,1931	Pseudofusulina ciwuensis Zhang,1982	Indochina Block	7.58	1.49	equatorial areas	Y	Fusiform	13
Schwagerinidae Dunbar et Henbest,1930	Schwag	Pseudofusulina Dunbar et Skinner,1931	Pseudofusulina ciwuensis Zhang,1982	Indochina Block	8.38	1.57	equatorial areas	Y	Fusiform	13
Schwagerinidae Dunbar et Henbest,1930	Schwag	Pseudofusulina Dunbar et Skinner,1931	Pseudofusulina ciwuensis Zhang,1982	Indochina Block	5.62	1.63	equatorial areas	Y	Fusiform	13
Schwagerinidae Dunbar et Henbest,1930	Schwag	Pseudofusulina Dunbar et Skinner,1931	Pseudofusulina regularis (Schellwien,1898)	Indochina Block	7.71	2.07	equatorial areas	Y	Fusiform	13
Schwagerinidae Dunbar et Henbest,1930	Schwag	Pseudofusulina Dunbar et Skinner,1931	Pseudofusulina uenoensis Kobayashi,1957	Indochina Block	7.71	2.11	equatorial areas	Y	Fusiform	13
Schwagerinidae Dunbar et Henbest,1930	Schwag	Pseudofusulina Dunbar et Skinner,1931	Pseudofusulina uenoensis Kobayashi,1957	Indochina Block	7.59	2.56	equatorial areas	Y	Fusiform	13
Schwagerinidae Dunbar et Henbest,1930	Schwag	Pseudofusulina Dunbar et Skinner,1931	Pseudofusulina uenoensis Kobayashi,1957	Indochina Block	8.77	2.76	equatorial areas	Y	Fusiform	13
Schwagerinidae Dunbar et Henbest,1930	Schwag	Pseudofusulina Dunbar et Skinner,1931	Pseudofusulina uenoensis Kobayashi,1957	Indochina Block	7.2	2.85	equatorial areas	Y	Fusiform	13
Schwagerinidae Dunbar et Henbest,1930	Schwag	Pseudofusulina Dunbar et Skinner,1931	Pseudofusulina uenoensis Kobayashi,1957	Indochina Block	8.93	3.05	equatorial areas	Y	Fusiform	13
Schwagerinidae Dunbar et Henbest,1930	Schwag	Pseudofusulina Dunbar et Skinner,1931	Pseudofusulina uenoensis Kobayashi,1957	Indochina Block	9.2	3.1	equatorial areas	Y	Fusiform	13
Schwagerinidae Dunbar et Henbest,1930	Schwag	Pseudofusulina Dunbar et Skinner,1931	Pseudofusulina kueichowensis obesa Sheng,1963	Indochina Block	5	3.21	equatorial areas	Y	Fusiform	13
Schwagerinidae Dunbar et Henbest,1930	Schwag	Schwagerina Moeller,1877	Schwagerina guangpianshanensis Sheng,1965	Indochina Block	7.84	2.23	equatorial areas	Y	Fusiform	13
Schwagerinidae Dunbar et Henbest,1930	Schwag	Schwagerina Moeller,1877	Schwagerina guangpianshanensis Sheng,1965	Indochina Block	7.55	2.24	equatorial areas	Y	Fusiform	13
Schwagerinidae Dunbar et Henbest,1930	Schwag	Schwagerina Moeller,1877	Schwagerina guangpianshanensis Sheng,1965	Indochina Block	5.93	2.31	equatorial areas	Y	Fusiform	13
Schwagerinidae Dunbar et Henbest,1930	Schwag	Schwagerina Moeller,1877	Schwagerina guangpianshanensis Sheng,1965	Indochina Block	10.2	2.92	equatorial areas	Y	Fusiform	13
Verbeekinidae Staff et Wedekina,1910	Verb	Verbeekina Staff,1909	Verbeekina sphaera Ozawa,1927	Indochina Block	2.7	1.5	equatorial areas	Y	Fusiform	13
Verbeekinidae Staff et Wedekina,1910	Verb	Verbeekina Staff,1909	Verbeekina sphaera Ozawa,1927	Indochina Block	2.45	1.95	equatorial areas	Y	Fusiform	13
Verbeekinidae Staff et Wedekina,1910	Verb	Verbeekina Staff,1909	Verbeekina sphaera Ozawa,1927	Indochina Block	2.52	2.26	equatorial areas	Y	Fusiform	13
Verbeekinidae Staff et Wedekina,1910	Verb	Verbeekina Staff,1909	Verbeekina sphaera Ozawa,1927	Indochina Block	3.53	2.95	equatorial areas	Y	Fusiform	13
Verbeekinidae Staff et Wedekina,1910	Verb	Verbeekina Staff,1909	Verbeekina sphaera Ozawa,1927	Indochina Block	3.9	3.29	equatorial areas	Y	Fusiform	13
Verbeekinidae Staff et Wedekina,1910	Verb	Verbeekina Staff,1909	Verbeekina verbeeki (Geinitz,1876)	Indochina Block	5.32	5.48	equatorial areas	Y	Fusiform	13
Schubertellidae Skinner,1931	Schu	Yangchienia Lee,1933	Yangchienia compressa (Ozawa,1927)	Indochina Block	1.18	0.64	equatorial areas	N	Fusiform	13
Schubertellidae Skinner,1931	Schu	Yangchienia Lee,1933	Yangchienia compressa (Ozawa,1927)	Indochina Block	1.88	0.76	equatorial areas	N	Fusiform	13
Schubertellidae Skinner,1931	Schu	Yangchienia Lee,1933	Yangchienia haydeni Thompson,1946	Indochina Block	1.65	1.025	equatorial areas	N	Fusiform	13
Schubertellidae Skinner,1931	Schu	Yangchienia Lee,1933	Yangchienia tobleri Thompson,1935	Indochina Block	1.985	1.07	equatorial areas	N	Fusiform	13
Schubertellidae Skinner,1931	Schu	Yangchienia Lee,1933	Yangchienia haydeni Thompson,1946	Indochina Block	1.76	1.15	equatorial areas	N	Fusiform	13
Schubertellidae Skinner,1931	Schu	Yangchienia Lee,1933	Yangchienia tobleri Thompson,1935	Indochina Block	1.65	1.17	equatorial areas	N	Fusiform	13
Schubertellidae Skinner,1931	Schu	Yangchienia Lee,1933	Yangchienia haydeni Thompson,1946	Indochina Block	2.47	1.18	equatorial areas	N	Fusiform	13
Schubertellidae Skinner,1931	Schu	Yangchienia Lee,1933	Yangchienia haydeni Thompson,1946	Indochina Block	2.54	1.23	equatorial areas	N	Fusiform	13
Schubertellidae Skinner,1931	Schu	Yangchienia Lee,1933	Yangchienia tobleri Thompson,1935	Indochina Block	2.59	1.32	equatorial areas	N	Fusiform	13
Schubertellidae Skinner,1931	Schu	Yangchienia Lee,1933	Yangchienia tobleri Thompson,1935	Indochina Block	2.25	1.45	equatorial areas	N	Fusiform	13
Schubertellidae Skinner,1931	Schu	Yangchienia Lee,1933	Yangchienia thompsoni Skinner et Wilde,1966	Indochina Block	3.14	1.5	equatorial areas	N	Fusiform	13
Schubertellidae Skinner,1931	Schu	Yangchienia Lee,1933	Yangchienia thompsoni Skinner et Wilde,1966	Indochina Block	3.2	1.57	equatorial areas	N	Fusiform	13
Schubertellidae Skinner,1931	Schu	Yangchienia Lee,1933	Yangchienia haydeni Thompson,1946	Indochina Block	3.18	1.66	equatorial areas	N	Fusiform	13
Neoschwagerinidae Dunbar et Condra,1927	Neo	Afghanella Thompson,1946	Afghanella robbinsae Skinner and Wilde, 1967	Kunlun-Qadam Block	5.4	3.04	equatorial areas	Y	Fusiform	18	[15]
Neoschwagerinidae Dunbar et Condra,1927	Neo	Afghanella Thompson,1946	Afghanella simplex Sheng,1963	Qamdo Block	3.05	1.62	equatorial areas	Y	Fusiform	26
Neoschwagerinidae Dunbar et Condra,1927	Neo	Afghanella Thompson,1946	Afghanella megaspherica Sheng,1958	Qamdo Block	5.32	3.34	equatorial areas	Y	Fusiform	26
Verbeekinidae Staff et Wedekina,1910	Verb	Armenina M.-Maclay,1955	Armenina crassispira (Chen,1956)	Kunlun-Qadam Block	5.23	4.77	equatorial areas	Y	Fusiform	18
Verbeekinidae Staff et Wedekina,1910	Verb	Armenina M.-Maclay,1955	Armenina crassispira (Chen,1956)	Kunlun-Qadam Block	5.04	4.82	equatorial areas	Y	Fusiform	18
Schwagerinidae Dunbar et Henbest,1930	Schwag	Chusenella Hsu,1942	Chusenella absidata Wang,Sheng et Zhang,1981	Kunlun-Qadam Block	4.25	1.675	equatorial areas	Y	Fusiform	18
Schwagerinidae Dunbar et Henbest,1930	Schwag	Chusenella Hsu,1942	Chusenella absidata Wang,Sheng et Zhang,1981	Kunlun-Qadam Block	7.225	1.863	equatorial areas	Y	Fusiform	18
Schwagerinidae Dunbar et Henbest,1930	Schwag	Chusenella Hsu,1942	Chusenella absidata Wang,Sheng et Zhang,1981	Kunlun-Qadam Block	8.16	2.38	equatorial areas	Y	Fusiform	18
Neoschwagerinidae Dunbar et Condra,1927	Neo	Colania Lee,1933	Colania douvillei (Ozawa, 1925)	Qamdo Block	4.35	2.475	equatorial areas	Y	Fusiform	26
Neoschwagerinidae Dunbar et Condra,1927	Neo	Colania Lee,1933	Colania douvillei (Ozawa, 1925)	Qamdo Block	4.663	3.063	equatorial areas	Y	Fusiform	26
Neoschwagerinidae Dunbar et Condra,1927	Neo	Colania Lee,1933	Colania douvillei (Ozawa, 1925)	Qamdo Block	4.913	3.15	equatorial areas	Y	Fusiform	26
Neoschwagerinidae Dunbar et Condra,1927	Neo	Colania Lee,1933	Colania douvillei (Ozawa, 1925)	Qamdo Block	5.51	3.38	equatorial areas	Y	Fusiform	26
Schubertellidae Skinner,1931	Schu	Dunbarula Ciry,1948	Dunbarula nana Kochansky-Devide et Ramovs,1955	Kunlun-Qadam Block	0.963	0.537	equatorial areas	N	Fusiform	18
Schubertellidae Skinner,1931	Schu	Dunbarula Ciry,1948	Dunbarula mathieui Ciry,1948	Kunlun-Qadam Block	1.51	0.91	equatorial areas	N	Fusiform	18
Schubertellidae Skinner,1931	Schu	Dunbarula Ciry,1948	Dunbarula mathieui Ciry,1948	Kunlun-Qadam Block	1.92	0.91	equatorial areas	N	Fusiform	18
Schubertellidae Skinner,1931	Schu	Dunbarula Ciry,1948	Dunbarula schubertellaeformis Sheng,1958	Qamdo Block	0.84	0.38	equatorial areas	N	Fusiform	26
Schubertellidae Skinner,1931	Schu	Dunbarula Ciry,1948	Dunbarula nana Kochansky-Devide et Ramovs,1955	Qamdo Block	1.14	0.76	equatorial areas	N	Fusiform	26
Schwagerinidae Dunbar et Henbest,1930	Schwag	Eopolydiexodina Wilde,1975	Eopolydiexodina chekiangensis Sheng, 1962	Kunlun-Qadam Block	11.68	1.99	equatorial areas	Y	Fusiform	18
Schwagerinidae Dunbar et Henbest,1930	Schwag	Eopolydiexodina Wilde,1975	Eopolydiexodina chekiangensis Sheng, 1962	Qamdo Block	20	3	equatorial areas	Y	Fusiform	26
Verbeekinidae Staff et Wedekina,1910	Verb	Metadoliolina Ishii et Nogami,1961	Metadoliolina compacta (Chen,1956)	Qamdo Block	3.99	1.98	equatorial areas	Y	Fusiform	26
Neoschwagerinidae Dunbar et Condra,1927	Neo	Neoschwagerina Yabe,1903	Neoschwagerina megasphaerica Deprat, 1913	Kunlun-Qadam Block	6.92	4.64	equatorial areas	Y	Fusiform	18
Neoschwagerinidae Dunbar et Condra,1927	Neo	Neoschwagerina Yabe,1903	Neoschwagerina cheni Sheng,1958	Qamdo Block	4.08	3.15	equatorial areas	Y	Fusiform	26
Neoschwagerinidae Dunbar et Condra,1927	Neo	Neoschwagerina Yabe,1903	Neoschwagerina craticulifera (Schwager, 1883)	Qamdo Block	5.24	3.57	equatorial areas	Y	Fusiform	26
Neoschwagerinidae Dunbar et Condra,1927	Neo	Neoschwagerina Yabe,1903	Neoschwagerina cheni Sheng,1958	Qamdo Block	4.3	3.66	equatorial areas	Y	Fusiform	26
Neoschwagerinidae Dunbar et Condra,1927	Neo	Neoschwagerina Yabe,1903	Neoschwagerina cheni Sheng,1958	Qamdo Block	4.73	4.38	equatorial areas	Y	Fusiform	26
Neoschwagerinidae Dunbar et Condra,1927	Neo	Neoschwagerina Yabe,1903	Neoschwagerina cheni Sheng,1958	Qamdo Block	6.73	5.81	equatorial areas	Y	Fusiform	26
Neoschwagerinidae Dunbar et Condra,1927	Neo	Neoschwagerina Yabe,1903	Neoschwagerina cheni Sheng,1958	Qamdo Block	8.083	6.25	equatorial areas	Y	Fusiform	26
Schwagerinidae Dunbar et Henbest,1930	Schwag	Parafusulina Dunbar et Skinner,1931	Parafusulina australis Thompson and Miller, 1944	Qamdo Block	11.13	3.87	equatorial areas	Y	Fusiform	26
Schwagerinidae Dunbar et Henbest,1930	Schwag	Parafusulina Dunbar et Skinner,1931	Parafusulina australis Thompson and Miller, 1944	Qamdo Block	10.383	4.083	equatorial areas	Y	Fusiform	26
Verbeekinidae Staff et Wedekina,1910	Verb	Pseudodoliolina Yabe et Hanzawa,1932	Pseudodoliolina pseudolepida (Deprat,1912)	Qamdo Block	4.98	1.873	equatorial areas	Y	Fusiform	26
Verbeekinidae Staff et Wedekina,1910	Verb	Pseudodoliolina Yabe et Hanzawa,1932	Pseudodoliolina ozawai Yabe et Hanzawa,1932	Qamdo Block	4.75	1.98	equatorial areas	Y	Fusiform	26
Verbeekinidae Staff et Wedekina,1910	Verb	Pseudodoliolina Yabe et Hanzawa,1932	Pseudodoliolina chinghaiensis Sheng,1958	Qamdo Block	3.693	2.02	equatorial areas	Y	Fusiform	26
Verbeekinidae Staff et Wedekina,1910	Verb	Pseudodoliolina Yabe et Hanzawa,1932	Pseudodoliolina chinghaiensis Sheng,1958	Qamdo Block	4.18	2.16	equatorial areas	Y	Fusiform	26
Verbeekinidae Staff et Wedekina,1910	Verb	Pseudodoliolina Yabe et Hanzawa,1932	Pseudodoliolina pseudolepida (Deprat,1912)	Qamdo Block	6.84	2.85	equatorial areas	Y	Fusiform	26
Schwagerinidae Dunbar et Henbest,1930	Schwag	Pseudofusulina Dunbar et Skinner,1931	Pseudofusulina paracrassialveola Sheng et Sun,1975	Kunlun-Qadam Block	3.74	1.8	equatorial areas	Y	Fusiform	18
Schwagerinidae Dunbar et Henbest,1930	Schwag	Pseudofusulina Dunbar et Skinner,1931	Pseudofusulina houziguanica Sheng,1963	Kunlun-Qadam Block	6.65	2.47	equatorial areas	Y	Fusiform	18
Schwagerinidae Dunbar et Henbest,1930	Schwag	Pseudofusulina Dunbar et Skinner,1931	Pseudofusulina ambigua pursatensis Gubler, 1935	Kunlun-Qadam Block	7.63	3.67	equatorial areas	Y	Fusiform	18
Schwagerinidae Dunbar et Henbest,1930	Schwag	Pseudofusulina Dunbar et Skinner,1931	Pseudofusulina tenuispira Sheng et Sun,1975	Kunlun-Qadam Block	16	4.33	equatorial areas	Y	Fusiform	18
Schwagerinidae Dunbar et Henbest,1930	Schwag	Pseudofusulina Dunbar et Skinner,1931	Pseudofusulina tenuispira Sheng et Sun,1975	Qamdo Block	10.66	4.33	equatorial areas	Y	Fusiform	26
Schwagerinidae Dunbar et Henbest,1930	Schwag	Pseudofusulina Dunbar et Skinner,1931	Pseudofusulina deformis Sheng et Sun,1975	Qamdo Block	15.33	4.53	equatorial areas	Y	Fusiform	26
Schwagerinidae Dunbar et Henbest,1930	Schwag	Pseudofusulina Dunbar et Skinner,1931	Pseudofusulina deformis Sheng et Sun,1975	Qamdo Block	20	4.6	equatorial areas	Y	Fusiform	26
Schwagerinidae Dunbar et Henbest,1930	Schwag	Pseudofusulina Dunbar et Skinner,1931	Pseudofusulina qinghaiana Sheng et Sun,1975	Qamdo Block	10.67	6.47	equatorial areas	Y	Fusiform	26
Schwagerinidae Dunbar et Henbest,1930	Schwag	Pseudofusulina Dunbar et Skinner,1931	Pseudofusulina qinghaiana Sheng et Sun,1975	Qamdo Block	13.74	8.46	equatorial areas	Y	Fusiform	26
Ozawainellidae Thompson et Foster,1937	Oza	Reichelina Erk,1941	Reichelina cribroseptata Erk,1941	Qamdo Block	0.383	0.863	equatorial areas	N	Lenticular	26
Ozawainellidae Thompson et Foster,1937	Oza	Reichelina Erk,1941	Reichelina cribroseptata Erk,1941	Qamdo Block	0.44	1	equatorial areas	N	Lenticular	26
Schwagerinidae Dunbar et Henbest,1930	Schwag	Schwagerina Moeller,1877	Schwagerina quasiregularis Sheng,1963	Kunlun-Qadam Block	5.85	2.01	equatorial areas	Y	Fusiform	18
Schwagerinidae Dunbar et Henbest,1930	Schwag	Schwagerina Moeller,1877	Schwagerina hupehensis Chen,1956	Kunlun-Qadam Block	8.267	2.833	equatorial areas	Y	Fusiform	18
Schwagerinidae Dunbar et Henbest,1930	Schwag	Schwagerina Moeller,1877	Schwagerina shidensis (Rauser,1949)	Kunlun-Qadam Block	8.44	2.96	equatorial areas	Y	Fusiform	18
Schwagerinidae Dunbar et Henbest,1930	Schwag	Schwagerina Moeller,1877	Schwagerina hupehensis Chen,1956	Kunlun-Qadam Block	9.76	3.34	equatorial areas	Y	Fusiform	18
Schwagerinidae Dunbar et Henbest,1930	Schwag	Schwagerina Moeller,1877	Schwagerina quasiregularis Sheng,1963	Qamdo Block	4.388	1.688	equatorial areas	Y	Fusiform	26
Schwagerinidae Dunbar et Henbest,1930	Schwag	Schwagerina Moeller,1877	Schwagerina quasiregularis Sheng,1963	Qamdo Block	4.938	1.9	equatorial areas	Y	Fusiform	26
Schwagerinidae Dunbar et Henbest,1930	Schwag	Schwagerina Moeller,1877	Schwagerina quasiqixiaensis Sheng et Sun,1975	Qamdo Block	9.22	2.7	equatorial areas	Y	Fusiform	26
Schwagerinidae Dunbar et Henbest,1930	Schwag	Schwagerina Moeller,1877	Schwagerina quasiqixiaensis Sheng et Sun,1975	Qamdo Block	10.15	2.99	equatorial areas	Y	Fusiform	26
Neoschwagerinidae Dunbar et Condra,1927	Neo	Sumatrina Volz,1904	Sumatrina annae Volz,1904	Qamdo Block	3.76	2.1	equatorial areas	Y	Fusiform	26
Neoschwagerinidae Dunbar et Condra,1927	Neo	Sumatrina Volz,1904	Sumatrina annae Volz,1904	Qamdo Block	5.83	2.3	equatorial areas	Y	Fusiform	26
Schubertellidae Skinner,1931	Schu	Toriyamaia Kanmera,1956	Toriyamaia ellipsoidalis Sheng et Sun,1975	Qamdo Block	0.83	0.59	equatorial areas	N	Fusiform	26
Verbeekinidae Staff et Wedekina,1910	Verb	Verbeekina Staff,1909	Verbeekina heimi Thompson et Foster,1937	Kunlun-Qadam Block	4.98	4.87	equatorial areas	Y	Fusiform	18
Verbeekinidae Staff et Wedekina,1910	Verb	Verbeekina Staff,1909	Verbeekina heimi Thompson et Foster,1937	Kunlun-Qadam Block	5.61	6	equatorial areas	Y	Fusiform	18
Verbeekinidae Staff et Wedekina,1910	Verb	Verbeekina Staff,1909	Verbeekina verbeeki (Geinitz,1876)	Qamdo Block	4.988	5.738	equatorial areas	Y	Fusiform	26
Schubertellidae Skinner,1931	Schu	Wutuella Sheng,1963	Wutuella wutuensis (Kuo,1948)	Kunlun-Qadam Block	4.8	0.9	equatorial areas	N	Fusiform	18
Neoschwagerinidae Dunbar et Condra,1927	Neo	Yabeina Deprat,1914	Yabeina kwangsiana (Lee,1933)	Qamdo Block	5.767	3.333	equatorial areas	Y	Fusiform	26
Neoschwagerinidae Dunbar et Condra,1927	Neo	Yabeina Deprat,1914	Yabeina kwangsiana (Lee,1933)	Qamdo Block	6.188	3.763	equatorial areas	Y	Fusiform	26
Neoschwagerinidae Dunbar et Condra,1927	Neo	Yabeina Deprat,1914	Yabeina kwangsiana (Lee,1933)	Qamdo Block	6.1	4.213	equatorial areas	Y	Fusiform	26
Neoschwagerinidae Dunbar et Condra,1927	Neo	Yabeina Deprat,1914	Yabeina kwangsiana (Lee,1933)	Qamdo Block	8.52	4.48	equatorial areas	Y	Fusiform	26
Neoschwagerinidae Dunbar et Condra,1927	Neo	Yabeina Deprat,1914	Yabeina gubleri Kanmera,1954	Qamdo Block	10.26	4.6	equatorial areas	Y	Fusiform	26
Neoschwagerinidae Dunbar et Condra,1927	Neo	Yabeina Deprat,1914	Yabeina inouyei Deprat,1914	Qamdo Block	11.4	7.6	equatorial areas	Y	Fusiform	26
Schubertellidae Skinner,1931	Schu	Yangchienia Lee,1933	Yangchienia thompsoni Skinner et Wilde,1966	Kunlun-Qadam Block	2.18	1.175	equatorial areas	N	Fusiform	18
Schubertellidae Skinner,1931	Schu	Yangchienia Lee,1933	Yangchienia thompsoni Skinner et Wilde,1966	Kunlun-Qadam Block	2.74	1.44	equatorial areas	N	Fusiform	18
Schubertellidae Skinner,1931	Schu	Yangchienia Lee,1933	Yangchienia iniqua Lee,1933	Qamdo Block	1.67	0.87	equatorial areas	N	Fusiform	26
Schubertellidae Skinner,1931	Schu	Yangchienia Lee,1933	Yangchienia compressa (Ozawa,1927)	Qamdo Block	2.74	1.25	equatorial areas	N	Fusiform	26
Schubertellidae Skinner,1931	Schu	Yangchienia Lee,1933	Yangchienia haydeni Thompson,1946	Qamdo Block	2.89	1.67	equatorial areas	N	Fusiform	26
Schwagerinidae Dunbar et Henbest,1930	Schwag	Eopolydiexodina Wilde,1975	Eopolydiexodina chekiangensis Sheng, 1962	South China	13.56	1.54	equatorial areas	Y	Fusiform	35	[16]
Schwagerinidae Dunbar et Henbest,1930	Schwag	Eopolydiexodina Wilde,1975	Eopolydiexodina chekiangensis Sheng, 1962	South China	12.72	1.98	equatorial areas	Y	Fusiform	35
Schwagerinidae Dunbar et Henbest,1930	Schwag	Eopolydiexodina Wilde,1975	Eopolydiexodina chekiangensis Sheng, 1962	South China	12.1	2.04	equatorial areas	Y	Fusiform	35
Schwagerinidae Dunbar et Henbest,1930	Schwag	Eopolydiexodina Wilde,1975	Eopolydiexodina chekiangensis Sheng, 1962	South China	14.7	2.1	equatorial areas	Y	Fusiform	35
Verbeekinidae Staff et Wedekina,1910	Verb	Metadoliolina Ishii et Nogami,1961	Metadoliolina compacta (Chen,1956)	South China	2.96	0.732	equatorial areas	Y	Fusiform	35
Verbeekinidae Staff et Wedekina,1910	Verb	Metadoliolina Ishii et Nogami,1961	Metadoliolina lepida (Schwager,1883)	South China	4.26	2.16	equatorial areas	Y	Fusiform	35
Schwagerinidae Dunbar et Henbest,1930	Schwag	Chusenella Hsu,1942	Chusenella xanzensis Wang,Sheng et Zhang,1981	Lhasa Block	3.35	0.95	south transitional zone	Y	Fusiform	19	[17]
Schwagerinidae Dunbar et Henbest,1930	Schwag	Chusenella Hsu,1942	Chusenella schwagerinaeformis Sheng,1963	Lhasa Block	3.57	1.66	south transitional zone	Y	Fusiform	19
Schwagerinidae Dunbar et Henbest,1930	Schwag	Chusenella Hsu,1942	Chusenella urulungensis Wang, Sheng and Zhang	Lhasa Block	4.61	2.02	south transitional zone	Y	Fusiform	19
Schwagerinidae Dunbar et Henbest,1930	Schwag	Chusenella Hsu,1942	Chusenella ellipsoidalis Wang,Sheng et Zhang,1981	Lhasa Block	2.99	2.16	south transitional zone	Y	Fusiform	19
Schwagerinidae Dunbar et Henbest,1930	Schwag	Chusenella Hsu,1942	Chusenella schwagerinaeformis Sheng,1963	Lhasa Block	5.16	2.16	south transitional zone	Y	Fusiform	19
Schwagerinidae Dunbar et Henbest,1930	Schwag	Chusenella Hsu,1942	Chusenella urulungensis Wang, Sheng and Zhang	Lhasa Block	5.1	2.23	south transitional zone	Y	Fusiform	19
Schwagerinidae Dunbar et Henbest,1930	Schwag	Chusenella Hsu,1942	Chusenella schwagerinaeformis Sheng,1963	Lhasa Block	3.32	2.37	south transitional zone	Y	Fusiform	19
Schwagerinidae Dunbar et Henbest,1930	Schwag	Chusenella Hsu,1942	Chusenella ellipsoidalis Wang,Sheng et Zhang,1981	Lhasa Block	4.64	2.45	south transitional zone	Y	Fusiform	19
Schwagerinidae Dunbar et Henbest,1930	Schwag	Chusenella Hsu,1942	Chusenella ellipsoidalis Wang,Sheng et Zhang,1981	Lhasa Block	4.03	2.52	south transitional zone	Y	Fusiform	19
Schwagerinidae Dunbar et Henbest,1930	Schwag	Chusenella Hsu,1942	Chusenella atlinensis (Ross, 1971)	Lhasa Block	7.77	3.28	south transitional zone	Y	Fusiform	19
Schwagerinidae Dunbar et Henbest,1930	Schwag	Chusenella Hsu,1942	Chusenella absidata Wang,Sheng et Zhang,1981	Tethys Himalaya	9.43	2.77	south transitional zone	Y	Fusiform	39
Schwagerinidae Dunbar et Henbest,1930	Schwag	Chusenella Hsu,1942	Chusenella absidata Wang,Sheng et Zhang,1981	Tethys Himalaya	9.21	2.84	south transitional zone	Y	Fusiform	39
Schwagerinidae Dunbar et Henbest,1930	Schwag	Chusenella Hsu,1942	Chusenella absidata Wang,Sheng et Zhang,1981	Tethys Himalaya	10.87	2.92	south transitional zone	Y	Fusiform	39
Schwagerinidae Dunbar et Henbest,1930	Schwag	Chusenella Hsu,1942	Chusenella absidata Wang,Sheng et Zhang,1981	Tethys Himalaya	11.52	3.17	south transitional zone	Y	Fusiform	39
Schwagerinidae Dunbar et Henbest,1930	Schwag	Chusenella Hsu,1942	Chusenella extensa Skinner,1969	Tethys Himalaya	11.5	3.2	south transitional zone	Y	Fusiform	39
Schwagerinidae Dunbar et Henbest,1930	Schwag	Chusenella Hsu,1942	Chusenella extensa Skinner,1969	Tethys Himalaya	12.5	3.2	south transitional zone	Y	Fusiform	39
Schwagerinidae Dunbar et Henbest,1930	Schwag	Chusenella Hsu,1942	Chusenella absidata Wang,Sheng et Zhang,1981	Tethys Himalaya	10.8	3.31	south transitional zone	Y	Fusiform	39
Schwagerinidae Dunbar et Henbest,1930	Schwag	Chusenella Hsu,1942	Chusenella extensa Skinner,1969	Tethys Himalaya	13	3.42	south transitional zone	Y	Fusiform	39
Neoschwagerinidae Dunbar et Condra,1927	Neo	Colania Lee,1933	Colania douvillei (Ozawa, 1925)	Lhasa Block	6.95	4.26	south transitional zone	Y	Fusiform	19
Schubertellidae Skinner,1931	Schu	Dunbarula Ciry,1948	Dunbarula nana Kochansky-Devide et Ramovs,1955	Lhasa Block	0.9	0.49	south transitional zone	N	Fusiform	19
Schubertellidae Skinner,1931	Schu	Dunbarula Ciry,1948	Dunbarula pusilla Skinner,1969	Tethys Himalaya	0.73	0.31	south transitional zone	N	Fusiform	39
Schubertellidae Skinner,1931	Schu	Dunbarula Ciry,1948	Dunbarula pusilla Skinner,1969	Tethys Himalaya	0.83	0.36	south transitional zone	N	Fusiform	39
Schubertellidae Skinner,1931	Schu	Dunbarula Ciry,1948	Dunbarula pusilla Skinner,1969	Tethys Himalaya	1	0.44	south transitional zone	N	Fusiform	39
Schubertellidae Skinner,1931	Schu	Dunbarula Ciry,1948	Dunbarula pusilla Skinner,1969	Tethys Himalaya	1.01	0.44	south transitional zone	N	Fusiform	39
Schubertellidae Skinner,1931	Schu	Dunbarula Ciry,1948	Dunbarula nana Kochansky-Devide et Ramovs,1955	Tethys Himalaya	0.9	0.49	south transitional zone	N	Fusiform	39
Schubertellidae Skinner,1931	Schu	Dunbarula Ciry,1948	Dunbarula pusilla Skinner,1969	Tethys Himalaya	1.14	0.5	south transitional zone	N	Fusiform	39
Schubertellidae Skinner,1931	Schu	Dunbarula Ciry,1948	Dunbarula pusilla Skinner,1969	Tethys Himalaya	1.36	0.53	south transitional zone	N	Fusiform	39
Verbeekinidae Staff et Wedekina,1910	Verb	Kahlerina Kochansky-Devidie et Ramovs,1955	Kahlerina tenuitheca Wang,Sheng et Zhang,1981	Tethys Himalaya	0.97	1.12	south transitional zone	Y	Fusiform	39
Verbeekinidae Staff et Wedekina,1910	Verb	Kahlerina Kochansky-Devidie et Ramovs,1955	Kahlerina pachytheca Kochansky-Devide et Ramovs,1955	Tethys Himalaya	1.26	1.66	south transitional zone	Y	Fusiform	39
Verbeekinidae Staff et Wedekina,1910	Verb	Kahlerina Kochansky-Devidie et Ramovs,1955	Kahlerina tenuitheca Wang,Sheng et Zhang,1981	Tethys Himalaya	1.4	1.66	south transitional zone	Y	Fusiform	39
Verbeekinidae Staff et Wedekina,1910	Verb	Kahlerina Kochansky-Devidie et Ramovs,1955	Kahlerina pachytheca Kochansky-Devide et Ramovs,1955	Tethys Himalaya	1.3	1.73	south transitional zone	Y	Fusiform	39
Verbeekinidae Staff et Wedekina,1910	Verb	Kahlerina Kochansky-Devidie et Ramovs,1955	Kahlerina pachytheca Kochansky-Devide et Ramovs,1955	Tethys Himalaya	1.37	1.8	south transitional zone	Y	Fusiform	39
Verbeekinidae Staff et Wedekina,1910	Verb	Kahlerina Kochansky-Devidie et Ramovs,1955	Kahlerina tenuitheca Wang,Sheng et Zhang,1981	Tethys Himalaya	1.51	1.91	south transitional zone	Y	Fusiform	39
Verbeekinidae Staff et Wedekina,1910	Verb	Kahlerina Kochansky-Devidie et Ramovs,1955	Kahlerina pachytheca Kochansky-Devide et Ramovs,1955	Tethys Himalaya	1.58	2.2	south transitional zone	Y	Fusiform	39
Verbeekinidae Staff et Wedekina,1910	Verb	Kahlerina Kochansky-Devidie et Ramovs,1955	Kahlerina pachytheca Kochansky-Devide et Ramovs,1955	Tethys Himalaya	1.87	2.52	south transitional zone	Y	Fusiform	39
Verbeekinidae Staff et Wedekina,1910	Verb	Kahlerina Kochansky-Devidie et Ramovs,1955	Kahlerina ussurica (Sosnina,1956)	Tethys Himalaya	2.27	2.52	south transitional zone	Y	Fusiform	39
Schubertellidae Skinner,1931	Schu	Lantschichites Toumanskaya,1953	Lantschichites kalamulunica Wang,Sheng et Zhang,1981	Qiangtang Block	1.523	0.503	south transitional zone	N	Fusiform	27
Schubertellidae Skinner,1931	Schu	Lantschichites Toumanskaya,1953	Lantschichites kalamulunica Wang,Sheng et Zhang,1981	Qiangtang Block	1.41	0.613	south transitional zone	N	Fusiform	27
Schubertellidae Skinner,1931	Schu	Lantschichites Toumanskaya,1953	Lantschichites kalamulunica Wang,Sheng et Zhang,1981	Qiangtang Block	1.6	0.63	south transitional zone	N	Fusiform	27
Schubertellidae Skinner,1931	Schu	Lantschichites Toumanskaya,1953	Lantschichites minima (Chen,1956)	Tethys Himalaya	1.94	0.38	south transitional zone	N	Fusiform	39
Schubertellidae Skinner,1931	Schu	Lantschichites Toumanskaya,1953	Lantschichites minima (Chen,1956)	Tethys Himalaya	2	0.42	south transitional zone	N	Fusiform	39
Schubertellidae Skinner,1931	Schu	Lantschichites Toumanskaya,1953	Lantschichites minima (Chen,1956)	Tethys Himalaya	2.16	0.42	south transitional zone	N	Fusiform	39
Schubertellidae Skinner,1931	Schu	Lantschichites Toumanskaya,1953	Lantschichites minima (Chen,1956)	Tethys Himalaya	1.8	0.43	south transitional zone	N	Fusiform	39
Schubertellidae Skinner,1931	Schu	Lantschichites Toumanskaya,1953	Lantschichites minima (Chen,1956)	Tethys Himalaya	2.3	0.47	south transitional zone	N	Fusiform	39
Schubertellidae Skinner,1931	Schu	Lantschichites Toumanskaya,1953	Lantschichites minima (Chen,1956)	Tethys Himalaya	1.85	0.52	south transitional zone	N	Fusiform	39
Schubertellidae Skinner,1931	Schu	Lantschichites Toumanskaya,1953	Lantschichites xizangicus Wang,Sheng et Zhang,1981	Tethys Himalaya	2.9	0.54	south transitional zone	N	Fusiform	39
Schubertellidae Skinner,1931	Schu	Lantschichites Toumanskaya,1953	Lantschichites xizangicus Wang,Sheng et Zhang,1981	Tethys Himalaya	2.56	0.57	south transitional zone	N	Fusiform	39
Schubertellidae Skinner,1931	Schu	Lantschichites Toumanskaya,1953	Lantschichites xizangicus Wang,Sheng et Zhang,1981	Tethys Himalaya	2.8	0.58	south transitional zone	N	Fusiform	39
Schubertellidae Skinner,1931	Schu	Lantschichites Toumanskaya,1953	Lantschichites xizangicus Wang,Sheng et Zhang,1981	Tethys Himalaya	3.06	0.61	south transitional zone	N	Fusiform	39
Schubertellidae Skinner,1931	Schu	Lantschichites Toumanskaya,1953	Lantschichites xizangicus Wang,Sheng et Zhang,1981	Tethys Himalaya	3.02	0.72	south transitional zone	N	Fusiform	39
Neoschwagerinidae Dunbar et Condra,1927	Neo	Lepidolina Lee,1933	Lepidolina shiraiwensis (Ozawa, 1925)	Lhasa Block	8.4	3.95	south transitional zone	Y	Fusiform	19
Neoschwagerinidae Dunbar et Condra,1927	Neo	Lepidolina Lee,1933	Lepidolina shiraiwensis (Ozawa, 1925)	Lhasa Block	8.6	4.8	south transitional zone	Y	Fusiform	19
Verbeekinidae Staff et Wedekina,1910	Verb	Metadoliolina Ishii et Nogami,1961	Metadoliolina multivoluta (Sheng,1963)	Qamdo Block	7.1	5.2	equatorial areas	Y	Fusiform	26
Verbeekinidae Staff et Wedekina,1910	Verb	Metadoliolina Ishii et Nogami,1961	Metadoliolina multivoluta (Sheng,1963)	Qamdo Block	7.3	5.27	equatorial areas	Y	Fusiform	26
Staffellidae A.D.Miklukho-Maklay, 1949	Staff	Nankinella Lee,1933	Nankinella complanata Wang,Sheng et Zhang,1981	Lhasa Block	1.67	3.72	south transitional zone	N	Lenticular	19
Staffellidae A.D.Miklukho-Maklay, 1949	Staff	Nankinella Lee,1933	Nankinella complanata Wang,Sheng et Zhang,1981	Lhasa Block	1.87	3.89	south transitional zone	N	Lenticular	19
Staffellidae A.D.Miklukho-Maklay, 1949	Staff	Nankinella Lee,1933	Nankinella quasihunanensis Sheng,1963	Lhasa Block	2.35	4.21	south transitional zone	N	Lenticular	19
Staffellidae A.D.Miklukho-Maklay, 1949	Staff	Nankinella Lee,1933	Nankinella quasihunanensis Sheng,1963	Lhasa Block	2.57	4.3	south transitional zone	N	Lenticular	19
Staffellidae A.D.Miklukho-Maklay, 1949	Staff	Nankinella Lee,1933	Nankinella xainzaensis Chu,1982	Lhasa Block	2.8	4.34	south transitional zone	N	Lenticular	19
Staffellidae A.D.Miklukho-Maklay, 1949	Staff	Nankinella Lee,1933	Nankinella xainzaensis Chu,1982	Lhasa Block	3.67	5.7	south transitional zone	N	Lenticular	19
Staffellidae A.D.Miklukho-Maklay, 1949	Staff	Nankinella Lee,1933	Nankinella laguensis Wang,Sheng et Zhang,1981	Lhasa Block	3.21	6.22	south transitional zone	N	Lenticular	19
Staffellidae A.D.Miklukho-Maklay, 1949	Staff	Nankinella Lee,1933	Nankinella rarivoluta Wang,Sheng et Zhang,1981	Tethys Himalaya	0.65	1.12	south transitional zone	N	Lenticular	39
Staffellidae A.D.Miklukho-Maklay, 1949	Staff	Nankinella Lee,1933	Nankinella rarivoluta Wang,Sheng et Zhang,1981	Tethys Himalaya	0.76	1.48	south transitional zone	N	Lenticular	39
Staffellidae A.D.Miklukho-Maklay, 1949	Staff	Nankinella Lee,1933	Nankinella rarivoluta Wang,Sheng et Zhang,1981	Tethys Himalaya	0.94	1.76	south transitional zone	N	Lenticular	39
Staffellidae A.D.Miklukho-Maklay, 1949	Staff	Nankinella Lee,1933	Nankinella rarivoluta Wang,Sheng et Zhang,1981	Tethys Himalaya	1.12	1.84	south transitional zone	N	Lenticular	39
Neoschwagerinidae Dunbar et Condra,1927	Neo	Neoschwagerina Yabe,1903	Neoschwagerina majulensis Wang,Sheng et Zhang,1981	Lhasa Block	4.3	2.92	south transitional zone	Y	Fusiform	19
Neoschwagerinidae Dunbar et Condra,1927	Neo	Neoschwagerina Yabe,1903	Neoschwagerina occidentalis Kochansky-Devide and Ramovs	Lhasa Block	3.56	3.17	south transitional zone	Y	Fusiform	19
Neoschwagerinidae Dunbar et Condra,1927	Neo	Neoschwagerina Yabe,1903	Neoschwagerina occidentalis Kochansky-Devide and Ramovs	Lhasa Block	3.46	3.2	south transitional zone	Y	Fusiform	19
Neoschwagerinidae Dunbar et Condra,1927	Neo	Neoschwagerina Yabe,1903	Neoschwagerina majulensis Wang,Sheng et Zhang,1981	Lhasa Block	4.75	3.23	south transitional zone	Y	Fusiform	19
Neoschwagerinidae Dunbar et Condra,1927	Neo	Neoschwagerina Yabe,1903	Neoschwagerina majulensis Wang,Sheng et Zhang,1981	Lhasa Block	5.5	3.7	south transitional zone	Y	Fusiform	19
Neoschwagerinidae Dunbar et Condra,1927	Neo	Neoschwagerina Yabe,1903	Neoschwagerina occidentalis Kochansky-Devide and Ramovs	Lhasa Block	4.8	4.23	south transitional zone	Y	Fusiform	19
Neoschwagerinidae Dunbar et Condra,1927	Neo	Neoschwagerina Yabe,1903	Neoschwagerina haydeni Dutkevich and Khabakov, 1934	Lhasa Block	6.17	4.45	south transitional zone	Y	Fusiform	19
Neoschwagerinidae Dunbar et Condra,1927	Neo	Neoschwagerina Yabe,1903	Neoschwagerina haydeni Dutkevich and Khabakov, 1934	Lhasa Block	6.57	4.61	south transitional zone	Y	Fusiform	19
Neoschwagerinidae Dunbar et Condra,1927	Neo	Neoschwagerina Yabe,1903	Neoschwagerina haydeni Dutkevich and Khabakov, 1934	Lhasa Block	7.02	5.16	south transitional zone	Y	Fusiform	19
Neoschwagerinidae Dunbar et Condra,1927	Neo	Neoschwagerina Yabe,1903	Neoschwagerina haydeni Dutkevich and Khabakov, 1934	Lhasa Block	7.08	5.29	south transitional zone	Y	Fusiform	19
Neoschwagerinidae Dunbar et Condra,1927	Neo	Neoschwagerina Yabe,1903	Neoschwagerina margaritae Deprat, 1913	Lhasa Block	9.2	6.41	south transitional zone	Y	Fusiform	19
Neoschwagerinidae Dunbar et Condra,1927	Neo	Neoschwagerina Yabe,1903	Neoschwagerina margaritae Deprat, 1913	Lhasa Block	6.62	6.48	south transitional zone	Y	Fusiform	19
Neoschwagerinidae Dunbar et Condra,1927	Neo	Neoschwagerina Yabe,1903	Neoschwagerina cheni Sheng,1958	Qiangtang Block	3.76	3.1	south transitional zone	Y	Fusiform	27
Neoschwagerinidae Dunbar et Condra,1927	Neo	Neoschwagerina Yabe,1903	Neoschwagerina cheni Sheng,1958	Qiangtang Block	4.11	3.81	south transitional zone	Y	Fusiform	27
Neoschwagerinidae Dunbar et Condra,1927	Neo	Neoschwagerina Yabe,1903	Neoschwagerina occidentalis Kochansky-Devide and Ramovs	Tethys Himalaya	5.11	3.6	south transitional zone	Y	Fusiform	39
Neoschwagerinidae Dunbar et Condra,1927	Neo	Neoschwagerina Yabe,1903	Neoschwagerina occidentalis Kochansky-Devide and Ramovs	Tethys Himalaya	5.4	3.78	south transitional zone	Y	Fusiform	39
Neoschwagerinidae Dunbar et Condra,1927	Neo	Neoschwagerina Yabe,1903	Neoschwagerina occidentalis Kochansky-Devide and Ramovs	Tethys Himalaya	5.11	3.89	south transitional zone	Y	Fusiform	39
Neoschwagerinidae Dunbar et Condra,1927	Neo	Neoschwagerina Yabe,1903	Neoschwagerina hukoensis K.Miklukho-Maclay, 1954	Tethys Himalaya	5.11	3.96	south transitional zone	Y	Fusiform	39
Neoschwagerinidae Dunbar et Condra,1927	Neo	Neoschwagerina Yabe,1903	Neoschwagerina fusiformis Skinner and Wilde, 1967	Tethys Himalaya	6.3	4.2	south transitional zone	Y	Fusiform	39
Neoschwagerinidae Dunbar et Condra,1927	Neo	Neoschwagerina Yabe,1903	Neoschwagerina occidentalis Kochansky-Devide and Ramovs	Tethys Himalaya	6.19	4.43	south transitional zone	Y	Fusiform	39
Neoschwagerinidae Dunbar et Condra,1927	Neo	Neoschwagerina Yabe,1903	Neoschwagerina hukoensis K.Miklukho-Maclay, 1954	Tethys Himalaya	5.7	4.45	south transitional zone	Y	Fusiform	39
Neoschwagerinidae Dunbar et Condra,1927	Neo	Neoschwagerina Yabe,1903	Neoschwagerina fusiformis Skinner and Wilde, 1967	Tethys Himalaya	7.23	4.54	south transitional zone	Y	Fusiform	39
Neoschwagerinidae Dunbar et Condra,1927	Neo	Neoschwagerina Yabe,1903	Neoschwagerina hukoensis K.Miklukho-Maclay, 1954	Tethys Himalaya	6.48	5.04	south transitional zone	Y	Fusiform	39
Schwagerinidae Dunbar et Henbest,1930	Schwag	Parafusulina Dunbar et Skinner,1931	Parafusulina shaksgamensis Reichel,1940	Lhasa Block	9.1	2.74	south transitional zone	Y	Fusiform	19
Schwagerinidae Dunbar et Henbest,1930	Schwag	Parafusulina Dunbar et Skinner,1931	Parafusulina shaksgamensis Reichel,1940	Lhasa Block	12.8	4.67	south transitional zone	Y	Fusiform	19
Verbeekinidae Staff et Wedekina,1910	Verb	Quasiverbeekina Wang,Sheng et Zhang,1981	Quasiverbeekina altimurensis Leven, 1997	Lhasa Block	5.97	6	south transitional zone	Y	Fusiform	19
Verbeekinidae Staff et Wedekina,1910	Verb	Quasiverbeekina Wang,Sheng et Zhang,1981	Quasiverbeekina altimurensis Leven, 1997	Lhasa Block	6.4	6.4	south transitional zone	Y	Fusiform	19
Verbeekinidae Staff et Wedekina,1910	Verb	Quasiverbeekina Wang,Sheng et Zhang,1981	Quasiverbeekina pedashanica Wang,Sheng et Zhang,1981	Tethys Himalaya	5.04	4.79	south transitional zone	Y	Fusiform	39
Verbeekinidae Staff et Wedekina,1910	Verb	Quasiverbeekina Wang,Sheng et Zhang,1981	Quasiverbeekina pedashanica Wang,Sheng et Zhang,1981	Tethys Himalaya	5.11	5.11	south transitional zone	Y	Fusiform	39
Verbeekinidae Staff et Wedekina,1910	Verb	Quasiverbeekina Wang,Sheng et Zhang,1981	Quasiverbeekina pedashanica Wang,Sheng et Zhang,1981	Tethys Himalaya	5.4	5.18	south transitional zone	Y	Fusiform	39
Verbeekinidae Staff et Wedekina,1910	Verb	Quasiverbeekina Wang,Sheng et Zhang,1981	Quasiverbeekina pedashanica Wang,Sheng et Zhang,1981	Tethys Himalaya	5.54	5.54	south transitional zone	Y	Fusiform	39
Schwagerinidae Dunbar et Henbest,1930	Schwag	Rugososchwagerina M.-Maclay,1956	Rugososchwagerina xizangica Wang,Sheng et Zhang,1981	Lhasa Block	7.56	6.48	south transitional zone	Y	Fusiform	19
Schwagerinidae Dunbar et Henbest,1930	Schwag	Rugososchwagerina M.-Maclay,1956	Rugososchwagerina xizangica Wang,Sheng et Zhang,1981	Lhasa Block	8	6.48	south transitional zone	Y	Fusiform	19
Schwagerinidae Dunbar et Henbest,1930	Schwag	Schwagerina Moeller,1877	Schwagerina kalamulunica Wang,Sheng et Zhang,1981	Qiangtang Block	7.1	1.95	south transitional zone	Y	Fusiform	27
Schwagerinidae Dunbar et Henbest,1930	Schwag	Schwagerina Moeller,1877	Schwagerina shuanghuensis Wang,Sheng et Zhang,1981	Qiangtang Block	7.42	2.17	south transitional zone	Y	Fusiform	27
Schwagerinidae Dunbar et Henbest,1930	Schwag	Schwagerina Moeller,1877	Schwagerina kalamulunica Wang,Sheng et Zhang,1981	Qiangtang Block	9.74	2.3	south transitional zone	Y	Fusiform	27
Schwagerinidae Dunbar et Henbest,1930	Schwag	Schwagerina Moeller,1877	Schwagerina shuanghuensis Wang,Sheng et Zhang,1981	Qiangtang Block	8.5	2.38	south transitional zone	Y	Fusiform	27
Schwagerinidae Dunbar et Henbest,1930	Schwag	Schwagerina Moeller,1877	Schwagerina quasiregularis Sheng,1963	Tethys Himalaya	6.5	2.02	south transitional zone	Y	Fusiform	39
Schwagerinidae Dunbar et Henbest,1930	Schwag	Schwagerina Moeller,1877	Schwagerina quasiqixiaensis Sheng et Sun,1975	Tethys Himalaya	8.6	2.2	south transitional zone	Y	Fusiform	39
Schwagerinidae Dunbar et Henbest,1930	Schwag	Schwagerina Moeller,1877	Schwagerina quasiqixiaensis Sheng et Sun,1975	Tethys Himalaya	7.49	2.23	south transitional zone	Y	Fusiform	39
Schwagerinidae Dunbar et Henbest,1930	Schwag	Schwagerina Moeller,1877	Schwagerina quasiqixiaensis Sheng et Sun,1975	Tethys Himalaya	9.6	2.81	south transitional zone	Y	Fusiform	39
Schwagerinidae Dunbar et Henbest,1930	Schwag	Schwagerina Moeller,1877	Schwagerina quasiqixiaensis Sheng et Sun,1975	Tethys Himalaya	9.65	3.03	south transitional zone	Y	Fusiform	39
Schwagerinidae Dunbar et Henbest,1930	Schwag	Schwagerina Moeller,1877	Schwagerina zhongbensis Wang,Sheng et Zhang,1981	Tethys Himalaya	13.6	3.78	south transitional zone	Y	Fusiform	39
Neoschwagerinidae Dunbar et Condra,1927	Neo	Sumatrina Volz,1904	Sumatrina annae Volz,1904	Qiangtang Block	3.82	1.03	south transitional zone	Y	Fusiform	27
Neoschwagerinidae Dunbar et Condra,1927	Neo	Sumatrina Volz,1904	Sumatrina annae Volz,1904	Qiangtang Block	5.12	1.58	south transitional zone	Y	Fusiform	27
Verbeekinidae Staff et Wedekina,1910	Verb	Verbeekina Staff,1909	Verbeekina verbeeki (Geinitz,1876)	Lhasa Block	5.93	6.27	south transitional zone	Y	Fusiform	19
Schwagerinidae Dunbar et Henbest,1930	Schwag	Xiaoxinzhaiella Shi, Yang and Jin, 2005	Xiaoxinzhaiella xanzensis (Wang, Sheng and Zhang, 1981)	Lhasa Block	6.18	5.24	south transitional zone	Y	Fusiform	19
Schwagerinidae Dunbar et Henbest,1930	Schwag	Xiaoxinzhaiella Shi, Yang and Jin, 2005	Xiaoxinzhaiella xanzensis (Wang, Sheng and Zhang, 1981)	Lhasa Block	5.88	5.42	south transitional zone	Y	Fusiform	19
Schwagerinidae Dunbar et Henbest,1930	Schwag	Xiaoxinzhaiella Shi, Yang and Jin, 2005	Xiaoxinzhaiella xanzensis (Wang, Sheng and Zhang, 1981)	Lhasa Block	6.07	5.74	south transitional zone	Y	Fusiform	19
Schwagerinidae Dunbar et Henbest,1930	Schwag	Xiaoxinzhaiella Shi, Yang and Jin, 2005	Xiaoxinzhaiella xanzensis (Wang, Sheng and Zhang, 1981)	Lhasa Block	7.56	6.34	south transitional zone	Y	Fusiform	19
Schubertellidae Skinner,1931	Schu	Yangchienia Lee,1933	Yangchienia haydeni Thompson,1946	Lhasa Block	3.24	1.61	south transitional zone	N	Fusiform	19
Schubertellidae Skinner,1931	Schu	Yangchienia Lee,1933	Yangchienia tumida Wang, Sheng et Zhang,1981	Lhasa Block	3.72	1.86	south transitional zone	N	Fusiform	19
Schubertellidae Skinner,1931	Schu	Yangchienia Lee,1933	Yangchienia tumida Wang, Sheng et Zhang,1981	Lhasa Block	3.92	2.39	south transitional zone	N	Fusiform	19
Schubertellidae Skinner,1931	Schu	Yangchienia Lee,1933	Yangchienia tumida Wang, Sheng et Zhang,1981	Lhasa Block	3.9	2.4	south transitional zone	N	Fusiform	19
Schubertellidae Skinner,1931	Schu	Yangchienia Lee,1933	Yangchienia fusiformis Wang, Sheng et Zhang,1981	Tethys Himalaya	5.61	2.41	south transitional zone	N	Fusiform	39
Schubertellidae Skinner,1931	Schu	Yangchienia Lee,1933	Yangchienia magna Wang, Sheng et Zhang,1981	Tethys Himalaya	4.82	2.63	south transitional zone	N	Fusiform	39
Schubertellidae Skinner,1931	Schu	Yangchienia Lee,1933	Yangchienia magna Wang, Sheng et Zhang,1981	Tethys Himalaya	5	2.7	south transitional zone	N	Fusiform	39
Schubertellidae Skinner,1931	Schu	Yangchienia Lee,1933	Yangchienia magna Wang, Sheng et Zhang,1981	Tethys Himalaya	5.04	2.77	south transitional zone	N	Fusiform	39
Schwagerinidae Dunbar et Henbest,1930	Schwag	Chusenella Hsu,1942	Chusenella sinensis Sheng,1963	Lhasa Block	2.3	0.87	south transitional zone	Y	Fusiform	19	[18]
Schwagerinidae Dunbar et Henbest,1930	Schwag	Chusenella Hsu,1942	Chusenella sinensis Sheng,1963	Lhasa Block	2.92	1.13	south transitional zone	Y	Fusiform	19
Schwagerinidae Dunbar et Henbest,1930	Schwag	Chusenella Hsu,1942	Chusenella schwagerinaeformis Sheng,1963	Lhasa Block	2.92	1.17	south transitional zone	Y	Fusiform	19
Schwagerinidae Dunbar et Henbest,1930	Schwag	Chusenella Hsu,1942	Chusenella sinensis Sheng,1963	Lhasa Block	2.77	1.31	south transitional zone	Y	Fusiform	19
Schwagerinidae Dunbar et Henbest,1930	Schwag	Chusenella Hsu,1942	Chusenella dorashamensis Rosovskaya, 1965	Lhasa Block	3.29	1.57	south transitional zone	Y	Fusiform	19
Schwagerinidae Dunbar et Henbest,1930	Schwag	Chusenella Hsu,1942	Chusenella schwagerinaeformis Sheng,1963	Lhasa Block	4.02	1.75	south transitional zone	Y	Fusiform	19
Schwagerinidae Dunbar et Henbest,1930	Schwag	Chusenella Hsu,1942	Chusenella schwagerinaeformis Sheng,1963	Lhasa Block	4.38	1.9	south transitional zone	Y	Fusiform	19
Schwagerinidae Dunbar et Henbest,1930	Schwag	Chusenella Hsu,1942	Chusenella schwagerinaeformis Sheng,1963	Lhasa Block	4.75	2.01	south transitional zone	Y	Fusiform	19
Schwagerinidae Dunbar et Henbest,1930	Schwag	Chusenella Hsu,1942	Chusenella ellipsoidalis Wang,Sheng et Zhang,1981	Lhasa Block	4.2	2.04	south transitional zone	Y	Fusiform	19
Staffellidae A.D.Miklukho-Maklay, 1949	Staff	Nankinella Lee,1933	Nankinella hunanensis (Chen,1956)	Lhasa Block	1.64	2.56	south transitional zone	N	Lenticular	19
Staffellidae A.D.Miklukho-Maklay, 1949	Staff	Nankinella Lee,1933	Nankinella hunanensis (Chen,1956)	Lhasa Block	1.35	2.92	south transitional zone	N	Lenticular	19
Staffellidae A.D.Miklukho-Maklay, 1949	Staff	Nankinella Lee,1933	Nankinella hunanensis (Chen,1956)	Lhasa Block	1.79	3.03	south transitional zone	N	Lenticular	19
Staffellidae A.D.Miklukho-Maklay, 1949	Staff	Nankinella Lee,1933	Nankinella hunanensis (Chen,1956)	Lhasa Block	1.83	3.1	south transitional zone	N	Lenticular	19
Staffellidae A.D.Miklukho-Maklay, 1949	Staff	Nankinella Lee,1933	Nankinella hunanensis (Chen,1956)	Lhasa Block	2.01	3.1	south transitional zone	N	Lenticular	19
Staffellidae A.D.Miklukho-Maklay, 1949	Staff	Nankinella Lee,1933	Nankinella xainzaensis Chu,1982	Lhasa Block	1.83	3.26	south transitional zone	N	Lenticular	19
Staffellidae A.D.Miklukho-Maklay, 1949	Staff	Nankinella Lee,1933	Nankinella hunanensis (Chen,1956)	Lhasa Block	2.01	3.7	south transitional zone	N	Lenticular	19
Staffellidae A.D.Miklukho-Maklay, 1949	Staff	Nankinella Lee,1933	Nankinella quasihunanensis Sheng,1963	Lhasa Block	2.11	3.83	south transitional zone	N	Lenticular	19
Staffellidae A.D.Miklukho-Maklay, 1949	Staff	Nankinella Lee,1933	Nankinella quasihunanensis Sheng,1963	Lhasa Block	2.37	3.92	south transitional zone	N	Lenticular	19
Staffellidae A.D.Miklukho-Maklay, 1949	Staff	Nankinella Lee,1933	Nankinella xainzaensis Chu,1982	Lhasa Block	2.56	4.2	south transitional zone	N	Lenticular	19
Staffellidae A.D.Miklukho-Maklay, 1949	Staff	Nankinella Lee,1933	Nankinella xainzaensis Chu,1982	Lhasa Block	2.37	4.22	south transitional zone	N	Lenticular	19
Staffellidae A.D.Miklukho-Maklay, 1949	Staff	Nankinella Lee,1933	Nankinella xainzaensis Chu,1982	Lhasa Block	2.48	4.27	south transitional zone	N	Lenticular	19
Staffellidae A.D.Miklukho-Maklay, 1949	Staff	Nankinella Lee,1933	Nankinella nanjiangensis Chang and Wang, 1974	Lhasa Block	3.29	4.56	south transitional zone	N	Lenticular	19
Staffellidae A.D.Miklukho-Maklay, 1949	Staff	Nankinella Lee,1933	Nankinella quasihunanensis Sheng,1963	Lhasa Block	2.77	4.92	south transitional zone	N	Lenticular	19
Staffellidae A.D.Miklukho-Maklay, 1949	Staff	Nankinella Lee,1933	Nankinella nanjiangensis Chang and Wang, 1974	Lhasa Block	3.29	5.11	south transitional zone	N	Lenticular	19
Staffellidae A.D.Miklukho-Maklay, 1949	Staff	Nankinella Lee,1933	Nankinella nanjiangensis Chang and Wang, 1974	Lhasa Block	3.29	5.37	south transitional zone	N	Lenticular	19
Staffellidae A.D.Miklukho-Maklay, 1949	Staff	Nankinella Lee,1933	Nankinella nanjiangensis Chang and Wang, 1974	Lhasa Block	3.47	5.48	south transitional zone	N	Lenticular	19
Staffellidae A.D.Miklukho-Maklay, 1949	Staff	Nankinella Lee,1933	Nankinella nanjiangensis Chang and Wang, 1974	Lhasa Block	3.65	5.66	south transitional zone	N	Lenticular	19
Ozawainellidae Thompson et Foster,1937	Oza	Ozawainella Thompson,1935	Ozawainella nankinellaeformis Yang,1978	Lhasa Block	1.28	2.48	south transitional zone	N	Lenticular	19
Ozawainellidae Thompson et Foster,1937	Oza	Ozawainella Thompson,1935	Ozawainella nankinellaeformis Yang,1978	Lhasa Block	1.35	2.74	south transitional zone	N	Lenticular	19
Ozawainellidae Thompson et Foster,1937	Oza	Ozawainella Thompson,1935	Ozawainella nankinellaeformis Yang,1978	Lhasa Block	2.01	3.29	south transitional zone	N	Lenticular	19
Schwagerinidae Dunbar et Henbest,1930	Schwag	Schwagerina Moeller,1877	Schwagerina quasiregularis Sheng,1963	Lhasa Block	2.96	1.1	south transitional zone	Y	Fusiform	19
Schwagerinidae Dunbar et Henbest,1930	Schwag	Schwagerina Moeller,1877	Schwagerina parabicornis Chen,1978	Lhasa Block	2.63	1.17	south transitional zone	Y	Fusiform	19
Schwagerinidae Dunbar et Henbest,1930	Schwag	Schwagerina Moeller,1877	Schwagerina xainzaensis Chu,1982	Lhasa Block	2.92	1.24	south transitional zone	Y	Fusiform	19
Schwagerinidae Dunbar et Henbest,1930	Schwag	Schwagerina Moeller,1877	Schwagerina xainzaensis Chu,1982	Lhasa Block	3.98	1.68	south transitional zone	Y	Fusiform	19
Staffellidae A.D.Miklukho-Maklay, 1949	Staff	Staffella Ozawa,1925	Staffella paraumbilicaris Yang,1978	Lhasa Block	0.8	1.64	south transitional zone	N	Lenticular	19
Staffellidae A.D.Miklukho-Maklay, 1949	Staff	Staffella Ozawa,1925	Staffella valida Yang,1978	Lhasa Block	2.05	3.28	south transitional zone	N	Lenticular	19
Staffellidae A.D.Miklukho-Maklay, 1949	Staff	Staffella Ozawa,1925	Staffella paraumbilicaris Yang,1978	Lhasa Block	2.4	4.033	south transitional zone	N	Lenticular	19
Staffellidae A.D.Miklukho-Maklay, 1949	Staff	Staffella Ozawa,1925	Staffella paraumbilicaris Yang,1978	Lhasa Block	2.45	4.38	south transitional zone	N	Lenticular	19
Neoschwagerinidae Dunbar et Condra,1927	Neo	Colania Lee,1933	Colania douvillei (Ozawa, 1925)	Lhasa Block	10.96	5.11	south transitional zone	Y	Fusiform	19	[19]
Neoschwagerinidae Dunbar et Condra,1927	Neo	Lepidolina Lee,1933	Lepidolina multiseptata (Deprat,1912)	Lhasa Block	8.03	4.75	south transitional zone	Y	Fusiform	19
Neoschwagerinidae Dunbar et Condra,1927	Neo	Lepidolina Lee,1933	Lepidolina multiseptata (Deprat,1912)	Lhasa Block	8.4	5.11	south transitional zone	Y	Fusiform	19
Neoschwagerinidae Dunbar et Condra,1927	Neo	Neoschwagerina Yabe,1903	Neoschwagerina kueichowensis Sheng,1963	Lhasa Block	4.93	2.74	south transitional zone	Y	Fusiform	19
Neoschwagerinidae Dunbar et Condra,1927	Neo	Neoschwagerina Yabe,1903	Neoschwagerina craticulifera (Schwager, 1883)	Lhasa Block	5.66	3.65	south transitional zone	Y	Fusiform	19
Neoschwagerinidae Dunbar et Condra,1927	Neo	Neoschwagerina Yabe,1903	Neoschwagerina hukoensis K.Miklukho-Maclay, 1954	Lhasa Block	6.94	5.04	south transitional zone	Y	Fusiform	19
Neoschwagerinidae Dunbar et Condra,1927	Neo	Sumatrina Volz,1904	Sumatrina annae Volz,1904	Lhasa Block	6.2	2.63	south transitional zone	Y	Fusiform	19
Verbeekinidae Staff et Wedekina,1910	Verb	Verbeekina Staff,1909	Verbeekina tenuispira Sheng,1963	Lhasa Block	6.6	7	south transitional zone	Y	Fusiform	19
Neoschwagerinidae Dunbar et Condra,1927	Neo	Yabeina Deprat,1914	Yabeina gubleri Kanmera,1954	Lhasa Block	10.13	3.8	south transitional zone	Y	Fusiform	19
Neoschwagerinidae Dunbar et Condra,1927	Neo	Yabeina Deprat,1914	Yabeina kwangsiana (Lee,1933)	Lhasa Block	8.21	4.56	south transitional zone	Y	Fusiform	19
Neoschwagerinidae Dunbar et Condra,1927	Neo	Afghanella Thompson,1946	Afghanella simplex Sheng,1963	Qamdo Block	3.17	1.65	equatorial areas	Y	Fusiform	26	[20]
Neoschwagerinidae Dunbar et Condra,1927	Neo	Afghanella Thompson,1946	Afghanella schencki Thompson, 1946	Qamdo Block	3.54	1.71	equatorial areas	Y	Fusiform	26
Neoschwagerinidae Dunbar et Condra,1927	Neo	Afghanella Thompson,1946	Afghanella schencki Thompson, 1946	Qamdo Block	3.54	1.8	equatorial areas	Y	Fusiform	26
Neoschwagerinidae Dunbar et Condra,1927	Neo	Afghanella Thompson,1946	Afghanella schencki Thompson, 1946	Qamdo Block	4.67	2.11	equatorial areas	Y	Fusiform	26
Neoschwagerinidae Dunbar et Condra,1927	Neo	Afghanella Thompson,1946	Afghanella megaspherica Sheng,1958	Qamdo Block	4.17	2.36	equatorial areas	Y	Fusiform	26
Neoschwagerinidae Dunbar et Condra,1927	Neo	Afghanella Thompson,1946	Afghanella megaspherica Sheng,1958	Qamdo Block	3.86	2.56	equatorial areas	Y	Fusiform	26
Verbeekinidae Staff et Wedekina,1910	Verb	Armenina M.-Maclay,1955	Armenina prisca Toriyama et Kanmera,1975	Qamdo Block	2.413	1.953	equatorial areas	Y	Fusiform	26
Verbeekinidae Staff et Wedekina,1910	Verb	Armenina M.-Maclay,1955	Armenina prisca Toriyama et Kanmera,1975	Qamdo Block	3.07	2.45	equatorial areas	Y	Fusiform	26
Verbeekinidae Staff et Wedekina,1910	Verb	Armenina M.-Maclay,1955	Armenina wangi Sheng,1963	Qamdo Block	4.37	3.87	equatorial areas	Y	Fusiform	26
Verbeekinidae Staff et Wedekina,1910	Verb	Armenina M.-Maclay,1955	Armenina wangi Sheng,1963	Qamdo Block	4.1	4	equatorial areas	Y	Fusiform	26
Neoschwagerinidae Dunbar et Condra,1927	Neo	Cancellina Hayden,1909 emend Kanmera,1957	Cancellina primigena (Hayden, 1909)	Qamdo Block	2.407	1.86	equatorial areas	Y	Fusiform	26
Neoschwagerinidae Dunbar et Condra,1927	Neo	Cancellina Hayden,1909 emend Kanmera,1957	Cancellina primigena (Hayden, 1909)	Qamdo Block	2.747	2.1	equatorial areas	Y	Fusiform	26
Neoschwagerinidae Dunbar et Condra,1927	Neo	Cancellina Hayden,1909 emend Kanmera,1957	Cancellina primigena (Hayden, 1909)	Qamdo Block	3.25	2.3	equatorial areas	Y	Fusiform	26
Schwagerinidae Dunbar et Henbest,1930	Schwag	Chusenella Hsu,1942	Chusenella tieni (Chen,1956)	Qamdo Block	4.25	1.09	equatorial areas	Y	Fusiform	26
Schwagerinidae Dunbar et Henbest,1930	Schwag	Chusenella Hsu,1942	Chusenella tieni (Chen,1956)	Qamdo Block	4.68	1.43	equatorial areas	Y	Fusiform	26
Schwagerinidae Dunbar et Henbest,1930	Schwag	Chusenella Hsu,1942	Chusenella schwagerinaeformis Sheng,1963	Qamdo Block	4.04	2.11	equatorial areas	Y	Fusiform	26
Schwagerinidae Dunbar et Henbest,1930	Schwag	Chusenella Hsu,1942	Chusenella schwagerinaeformis Sheng,1963	Qamdo Block	5.5	2.35	equatorial areas	Y	Fusiform	26
Schwagerinidae Dunbar et Henbest,1930	Schwag	Chusenella Hsu,1942	Chusenella conicocylindrica Chen,1956	Qamdo Block	6.91	2.64	equatorial areas	Y	Fusiform	26
Schubertellidae Skinner,1931	Schu	Codonofusiella Dunbar et Skinner,1937	Codonofusiella kwangsiana Sheng,1963	Qamdo Block	0.68	0.42	equatorial areas	N	Fusiform	26
Schubertellidae Skinner,1931	Schu	Codonofusiella Dunbar et Skinner,1937	Codonofusiella kwangsiana Sheng,1963	Qamdo Block	0.73	0.45	equatorial areas	N	Fusiform	26
Schubertellidae Skinner,1931	Schu	Codonofusiella Dunbar et Skinner,1937	Codonofusiella pseudolui Sheng,1963	Qamdo Block	1.216	0.596	equatorial areas	N	Fusiform	26
Schubertellidae Skinner,1931	Schu	Codonofusiella Dunbar et Skinner,1937	Codonofusiella kwangsiana Sheng,1963	Qamdo Block	0.93	0.6	equatorial areas	N	Fusiform	26
Schubertellidae Skinner,1931	Schu	Codonofusiella Dunbar et Skinner,1937	Codonofusiella kwangsiana Sheng,1963	Qamdo Block	1.04	0.6	equatorial areas	N	Fusiform	26
Schubertellidae Skinner,1931	Schu	Codonofusiella Dunbar et Skinner,1937	Codonofusiella pseudolui Sheng,1963	Qamdo Block	1.66	0.81	equatorial areas	N	Fusiform	26
Neoschwagerinidae Dunbar et Condra,1927	Neo	Colania Lee,1933	Colania douvillei (Ozawa, 1925)	Qamdo Block	4.9	2.95	equatorial areas	Y	Fusiform	26
Neoschwagerinidae Dunbar et Condra,1927	Neo	Colania Lee,1933	Colania douvillei (Ozawa, 1925)	Qamdo Block	7	3.17	equatorial areas	Y	Fusiform	26
Neoschwagerinidae Dunbar et Condra,1927	Neo	Colania Lee,1933	Colania douvillei (Ozawa, 1925)	Qamdo Block	5.4	3.37	equatorial areas	Y	Fusiform	26
Verbeekinidae Staff et Wedekina,1910	Verb	Kahlerina Kochansky-Devidie et Ramovs,1955	Kahlerina minima Sheng,1963	Qamdo Block	1.06	1.16	equatorial areas	Y	Fusiform	26
Verbeekinidae Staff et Wedekina,1910	Verb	Kahlerina Kochansky-Devidie et Ramovs,1955	Kahlerina siciliana Skinner et Wilde,1966	Qamdo Block	0.87	1.555	equatorial areas	Y	Fusiform	26
Neoschwagerinidae Dunbar et Condra,1927	Neo	Maklaya Kanmera et Toriyama,1968	Maklaya sethaputi Kanmera et Toriyama,1968	Qamdo Block	2.74	1.63	equatorial areas	Y	Fusiform	26
Neoschwagerinidae Dunbar et Condra,1927	Neo	Maklaya Kanmera et Toriyama,1968	Maklaya sethaputi Kanmera et Toriyama,1968	Qamdo Block	3.67	1.97	equatorial areas	Y	Fusiform	26
Neoschwagerinidae Dunbar et Condra,1927	Neo	Maklaya Kanmera et Toriyama,1968	Maklaya haitongica (Zhang,1982)	Qamdo Block	3.44	2.69	equatorial areas	Y	Fusiform	26
Neoschwagerinidae Dunbar et Condra,1927	Neo	Maklaya Kanmera et Toriyama,1968	Maklaya haitongica (Zhang,1982)	Qamdo Block	3.06	2.873	equatorial areas	Y	Fusiform	26
Neoschwagerinidae Dunbar et Condra,1927	Neo	Maklaya Kanmera et Toriyama,1968	Maklaya haitongica (Zhang,1982)	Qamdo Block	4.107	2.887	equatorial areas	Y	Fusiform	26
Verbeekinidae Staff et Wedekina,1910	Verb	Metadoliolina Ishii et Nogami,1961	Metadoliolina lepida (Schwager,1883)	Qamdo Block	4.5	2.6	equatorial areas	Y	Fusiform	26
Verbeekinidae Staff et Wedekina,1910	Verb	Metadoliolina Ishii et Nogami,1961	Metadoliolina lepida (Schwager,1883)	Qamdo Block	4.8	2.68	equatorial areas	Y	Fusiform	26
Verbeekinidae Staff et Wedekina,1910	Verb	Metadoliolina Ishii et Nogami,1961	Metadoliolina lepida (Schwager,1883)	Qamdo Block	6.68	3.1	equatorial areas	Y	Fusiform	26
Verbeekinidae Staff et Wedekina,1910	Verb	Metadoliolina Ishii et Nogami,1961	Metadoliolina brevicylindrica (Liu,Dong et Xiao,1978)	Qamdo Block	7.3	4.47	equatorial areas	Y	Fusiform	26
Verbeekinidae Staff et Wedekina,1910	Verb	Metadoliolina Ishii et Nogami,1961	Metadoliolina multivoluta (Sheng,1963)	Qamdo Block	6.28	4.7	equatorial areas	Y	Fusiform	26
Verbeekinidae Staff et Wedekina,1910	Verb	Metadoliolina Ishii et Nogami,1961	Metadoliolina brevicylindrica (Liu,Dong et Xiao,1978)	Qamdo Block	8.06	4.81	equatorial areas	Y	Fusiform	26
Verbeekinidae Staff et Wedekina,1910	Verb	Metadoliolina Ishii et Nogami,1961	Metadoliolina multivoluta (Sheng,1963)	Qamdo Block	9.74	6.7	equatorial areas	Y	Fusiform	26
Verbeekinidae Staff et Wedekina,1910	Verb	Metadoliolina Ishii et Nogami,1961	Metadoliolina multivoluta (Sheng,1963)	Qamdo Block	11.3	8.8	equatorial areas	Y	Fusiform	26
Neoschwagerinidae Dunbar et Condra,1927	Neo	Neoschwagerina Yabe,1903	Neoschwagerina craticulifera (Schwager, 1883)	Qamdo Block	4.8	2.87	equatorial areas	Y	Fusiform	26
Neoschwagerinidae Dunbar et Condra,1927	Neo	Neoschwagerina Yabe,1903	Neoschwagerina simplex Ozawa,1927	Qamdo Block	3.44	3.3	equatorial areas	Y	Fusiform	26
Neoschwagerinidae Dunbar et Condra,1927	Neo	Neoschwagerina Yabe,1903	Neoschwagerina cheni Sheng,1958	Qamdo Block	4.6	3.37	equatorial areas	Y	Fusiform	26
Neoschwagerinidae Dunbar et Condra,1927	Neo	Neoschwagerina Yabe,1903	Neoschwagerina simplex Ozawa,1927	Qamdo Block	3.44	3.57	equatorial areas	Y	Fusiform	26
Neoschwagerinidae Dunbar et Condra,1927	Neo	Neoschwagerina Yabe,1903	Neoschwagerina cheni Sheng,1958	Qamdo Block	5.37	3.89	equatorial areas	Y	Fusiform	26
Neoschwagerinidae Dunbar et Condra,1927	Neo	Neoschwagerina Yabe,1903	Neoschwagerina cheni Sheng,1958	Qamdo Block	5.2	3.97	equatorial areas	Y	Fusiform	26
Neoschwagerinidae Dunbar et Condra,1927	Neo	Neoschwagerina Yabe,1903	Neoschwagerina megasphaerica Deprat, 1913	Qamdo Block	7.45	4.1	equatorial areas	Y	Fusiform	26
Neoschwagerinidae Dunbar et Condra,1927	Neo	Neoschwagerina Yabe,1903	Neoschwagerina haydeni Dutkevich and Khabakov, 1934	Qamdo Block	5.8	4.14	equatorial areas	Y	Fusiform	26
Neoschwagerinidae Dunbar et Condra,1927	Neo	Neoschwagerina Yabe,1903	Neoschwagerina cheni Sheng,1958	Qamdo Block	6.72	5.22	equatorial areas	Y	Fusiform	26
Neoschwagerinidae Dunbar et Condra,1927	Neo	Neoschwagerina Yabe,1903	Neoschwagerina margaritae Deprat, 1913	Qamdo Block	9.15	7.06	equatorial areas	Y	Fusiform	26
Neoschwagerinidae Dunbar et Condra,1927	Neo	Neoschwagerina Yabe,1903	Neoschwagerina margaritae Deprat, 1913	Qamdo Block	8.64	8	equatorial areas	Y	Fusiform	26
Verbeekinidae Staff et Wedekina,1910	Verb	Paraverbeekina M.-Maclay,1955	Paraverbeekina umbilicata Sheng,1963	Qamdo Block	5.5	3.96	equatorial areas	Y	Fusiform	26
Verbeekinidae Staff et Wedekina,1910	Verb	Paraverbeekina M.-Maclay,1955	Paraverbeekina ellipsoidalis (Chen,1956)	Qamdo Block	7.68	5.55	equatorial areas	Y	Fusiform	26
Verbeekinidae Staff et Wedekina,1910	Verb	Paraverbeekina M.-Maclay,1955	Paraverbeekina ellipsoidalis (Chen,1956)	Qamdo Block	9.2	6.26	equatorial areas	Y	Fusiform	26
Verbeekinidae Staff et Wedekina,1910	Verb	Paraverbeekina M.-Maclay,1955	Paraverbeekina kangdingica Zhang,1982	Qamdo Block	15.5	12.7	equatorial areas	Y	Fusiform	26
Neoschwagerinidae Dunbar et Condra,1927	Neo	Sumatrina Volz,1904	Sumatrina longissima Deprat,1914	Qamdo Block	4.7	1.2	equatorial areas	Y	Fusiform	26
Neoschwagerinidae Dunbar et Condra,1927	Neo	Sumatrina Volz,1904	Sumatrina annae Volz,1904	Qamdo Block	6.33	2.41	equatorial areas	Y	Fusiform	26
Neoschwagerinidae Dunbar et Condra,1927	Neo	Sumatrina Volz,1904	Sumatrina annae Volz,1904	Qamdo Block	8.55	3.19	equatorial areas	Y	Fusiform	26
Verbeekinidae Staff et Wedekina,1910	Verb	Verbeekina Staff,1909	Verbeekina sphaera Ozawa,1927	Qamdo Block	2.35	2	equatorial areas	Y	Fusiform	26
Verbeekinidae Staff et Wedekina,1910	Verb	Verbeekina Staff,1909	Verbeekina sphaera Ozawa,1927	Qamdo Block	2.18	2.02	equatorial areas	Y	Fusiform	26
Verbeekinidae Staff et Wedekina,1910	Verb	Verbeekina Staff,1909	Verbeekina sphaera Ozawa,1927	Qamdo Block	2.5	2.13	equatorial areas	Y	Fusiform	26
Verbeekinidae Staff et Wedekina,1910	Verb	Verbeekina Staff,1909	Verbeekina sphaera Ozawa,1927	Qamdo Block	2.11	2.31	equatorial areas	Y	Fusiform	26
Verbeekinidae Staff et Wedekina,1910	Verb	Verbeekina Staff,1909	Verbeekina verbeeki (Geinitz,1876)	Qamdo Block	7.5	7.5	equatorial areas	Y	Fusiform	26
Verbeekinidae Staff et Wedekina,1910	Verb	Verbeekina Staff,1909	Verbeekina verbeeki (Geinitz,1876)	Qamdo Block	7.5	7.5	equatorial areas	Y	Fusiform	26
Verbeekinidae Staff et Wedekina,1910	Verb	Verbeekina Staff,1909	Verbeekina verbeeki (Geinitz,1876)	Qamdo Block	7.5	7.5	equatorial areas	Y	Fusiform	26
Verbeekinidae Staff et Wedekina,1910	Verb	Verbeekina Staff,1909	Verbeekina heimi Thompson et Foster,1937	Qamdo Block	9.71	10.6	equatorial areas	Y	Fusiform	26
Neoschwagerinidae Dunbar et Condra,1927	Neo	Yabeina Deprat,1914	Yabeina gubleri Kanmera,1954	Qamdo Block	8.42	3.8	equatorial areas	Y	Fusiform	26
Neoschwagerinidae Dunbar et Condra,1927	Neo	Yabeina Deprat,1914	Yabeina gubleri Kanmera,1954	Qamdo Block	7.28	3.83	equatorial areas	Y	Fusiform	26
Neoschwagerinidae Dunbar et Condra,1927	Neo	Yabeina Deprat,1914	Yabeina kwangsiana (Lee,1933)	Qamdo Block	16.94	4.06	equatorial areas	Y	Fusiform	26
Neoschwagerinidae Dunbar et Condra,1927	Neo	Yabeina Deprat,1914	Yabeina columbiana (Dawson,1879)	Qamdo Block	6.7	4.19	equatorial areas	Y	Fusiform	26
Neoschwagerinidae Dunbar et Condra,1927	Neo	Yabeina Deprat,1914	Yabeina gubleri Kanmera,1954	Qamdo Block	8.4	4.5	equatorial areas	Y	Fusiform	26
Neoschwagerinidae Dunbar et Condra,1927	Neo	Yabeina Deprat,1914	Yabeina gubleri Kanmera,1954	Qamdo Block	9.2	4.5	equatorial areas	Y	Fusiform	26
Neoschwagerinidae Dunbar et Condra,1927	Neo	Yabeina Deprat,1914	Yabeina kwangsiana (Lee,1933)	Qamdo Block	8.12	4.8	equatorial areas	Y	Fusiform	26
Neoschwagerinidae Dunbar et Condra,1927	Neo	Yabeina Deprat,1914	Yabeina columbiana (Dawson,1879)	Qamdo Block	7.3	5.16	equatorial areas	Y	Fusiform	26
Neoschwagerinidae Dunbar et Condra,1927	Neo	Yabeina Deprat,1914	Yabeina parvula Skinner and Wilde, 1966	Qamdo Block	6.6	5.4	equatorial areas	Y	Fusiform	26
Schubertellidae Skinner,1931	Schu	Yangchienia Lee,1933	Yangchienia haydeni Thompson,1946	Qamdo Block	2.01	1.09	equatorial areas	N	Fusiform	26
Schubertellidae Skinner,1931	Schu	Yangchienia Lee,1933	Yangchienia haydeni Thompson,1946	Qamdo Block	2.28	1.16	equatorial areas	N	Fusiform	26
Schubertellidae Skinner,1931	Schu	Yangchienia Lee,1933	Yangchienia haydeni Thompson,1946	Qamdo Block	2.14	1.19	equatorial areas	N	Fusiform	26
Schubertellidae Skinner,1931	Schu	Yangchienia Lee,1933	Yangchienia iniqua Lee,1933	Qamdo Block	2	1.2	equatorial areas	N	Fusiform	26
Schubertellidae Skinner,1931	Schu	Yangchienia Lee,1933	Yangchienia haydeni Thompson,1946	Qamdo Block	2.18	1.21	equatorial areas	N	Fusiform	26
Schubertellidae Skinner,1931	Schu	Yangchienia Lee,1933	Yangchienia iniqua Lee,1933	Qamdo Block	2	1.5	equatorial areas	N	Fusiform	26
Verbeekinidae Staff et Wedekina,1910	Verb	Armenina M.-Maclay,1955	Armenina wangi Sheng,1963	Qiangtang Block	2.64	2.4	south transitional zone	Y	Fusiform	27	[21]
Verbeekinidae Staff et Wedekina,1910	Verb	Armenina M.-Maclay,1955	Armenina wangi Sheng,1963	Qiangtang Block	4.12	3.56	south transitional zone	Y	Fusiform	27
Verbeekinidae Staff et Wedekina,1910	Verb	Armenina M.-Maclay,1955	Armenina wangi Sheng,1963	Qiangtang Block	3.76	3.76	south transitional zone	Y	Fusiform	27
Verbeekinidae Staff et Wedekina,1910	Verb	Armenina M.-Maclay,1955	Armenina wangi Sheng,1963	Qiangtang Block	3.84	3.92	south transitional zone	Y	Fusiform	27
Neoschwagerinidae Dunbar et Condra,1927	Neo	Cancellina Hayden,1909 emend Kanmera,1957	Cancellina dutkevitchi Leven, 1967	Qiangtang Block	1.92	1.76	south transitional zone	Y	Fusiform	27
Schwagerinidae Dunbar et Henbest,1930	Schwag	Chusenella Hsu,1942	Chusenella tingi Chen,1956	Qiangtang Block	4.49	1.98	south transitional zone	Y	Fusiform	27
Neoschwagerinidae Dunbar et Condra,1927	Neo	Colania Lee,1933	Colania ngariensis Nie et Song,1983	Qiangtang Block	4.32	2.28	south transitional zone	Y	Fusiform	27
Neoschwagerinidae Dunbar et Condra,1927	Neo	Colania Lee,1933	Colania duomaensis Nie et Song,1983	Qiangtang Block	4.52	3.08	south transitional zone	Y	Fusiform	27
Neoschwagerinidae Dunbar et Condra,1927	Neo	Colania Lee,1933	Colania duomaensis Nie et Song,1983	Qiangtang Block	4.4	3.24	south transitional zone	Y	Fusiform	27
Neoschwagerinidae Dunbar et Condra,1927	Neo	Colania Lee,1933	Colania ngariensis Nie et Song,1983	Qiangtang Block	5.09	4.09	south transitional zone	Y	Fusiform	27
Neoschwagerinidae Dunbar et Condra,1927	Neo	Colania Lee,1933	Colania aulaensis Nie et Song,1983	Qiangtang Block	6.62	4.95	south transitional zone	Y	Fusiform	27
Neoschwagerinidae Dunbar et Condra,1927	Neo	Colania Lee,1933	Colania aulaensis Nie et Song,1983	Qiangtang Block	7.69	5.58	south transitional zone	Y	Fusiform	27
Schubertellidae Skinner,1931	Schu	Dunbarula Ciry,1948	Dunbarula pusilla Skinner,1969	Qiangtang Block	0.84	0.32	south transitional zone	N	Fusiform	27
Verbeekinidae Staff et Wedekina,1910	Verb	Kahlerina Kochansky-Devidie et Ramovs,1955	Kahlerina nanlingensis Wang, 1982	Qiangtang Block	1.08	1.26	south transitional zone	Y	Fusiform	27
Verbeekinidae Staff et Wedekina,1910	Verb	Kahlerina Kochansky-Devidie et Ramovs,1955	Kahlerina nanlingensis Wang, 1982	Qiangtang Block	1.08	1.49	south transitional zone	Y	Fusiform	27
Staffellidae A.D.Miklukho-Maklay, 1949	Staff	Nankinella Lee,1933	Nankinella longgensis Nie et Song,1983	Qiangtang Block	1.36	2.4	south transitional zone	N	Lenticular	27
Staffellidae A.D.Miklukho-Maklay, 1949	Staff	Nankinella Lee,1933	Nankinella longgensis Nie et Song,1983	Qiangtang Block	1.6	2.96	south transitional zone	N	Lenticular	27
Neoschwagerinidae Dunbar et Condra,1927	Neo	Neoschwagerina Yabe,1903	Neoschwagerina guoi Nie et Song,1983	Qiangtang Block	5.01	4.29	south transitional zone	Y	Fusiform	27
Neoschwagerinidae Dunbar et Condra,1927	Neo	Neoschwagerina Yabe,1903	Neoschwagerina guoi Nie et Song,1983	Qiangtang Block	5.94	4.62	south transitional zone	Y	Fusiform	27
Ozawainellidae Thompson et Foster,1937	Oza	Ozawainella Thompson,1935	Ozawainella turgida Sheng, 1958	Qiangtang Block	0.68	1.4	south transitional zone	N	Lenticular	27
Verbeekinidae Staff et Wedekina,1910	Verb	Pseudodoliolina Yabe et Hanzawa,1932	Pseudodoliolina ozawai Yabe et Hanzawa,1932	Qiangtang Block	4.09	1.65	south transitional zone	Y	Fusiform	27
Neoschwagerinidae Dunbar et Condra,1927	Neo	Rugosomaklaya Nie et Song,1983	Rugosomaklaya tibetica Nie et Song,1983	Qiangtang Block	3.1	2.1	south transitional zone	Y	Fusiform	27
Schubertellidae Skinner,1931	Schu	Schubertella Staff et Wedekind,1910	Schubertella lata Lee and Chen, 1930	Qiangtang Block	0.62	0.42	south transitional zone	N	Fusiform	27
Staffellidae A.D.Miklukho-Maklay, 1949	Staff	Staffella Ozawa,1925	Staffella sphaerica (Abich, 1858)	Qiangtang Block	1.19	1.42	south transitional zone	N	Lenticular	27
Neoschwagerinidae Dunbar et Condra,1927	Neo	Sumatrina Volz,1904	Sumatrina brevis Leven, 1967	Qiangtang Block	3.2	1.46	south transitional zone	Y	Fusiform	27
Neoschwagerinidae Dunbar et Condra,1927	Neo	Sumatrina Volz,1904	Sumatrina brevis Leven, 1967	Qiangtang Block	4.16	2	south transitional zone	Y	Fusiform	27
Schubertellidae Skinner,1931	Schu	Toriyamaia Kanmera,1956	Toriyamaia laxiseptata Kanmera,1956	Qiangtang Block	0.88	0.42	south transitional zone	N	Fusiform	27
Verbeekinidae Staff et Wedekina,1910	Verb	Verbeekina Staff,1909	Verbeekina laxispira Nie et Song,1983	Qiangtang Block	2.08	2.12	south transitional zone	Y	Fusiform	27
Verbeekinidae Staff et Wedekina,1910	Verb	Verbeekina Staff,1909	Verbeekina iniqua Nie et Song,1983	Qiangtang Block	2.8	2.72	south transitional zone	Y	Fusiform	27
Verbeekinidae Staff et Wedekina,1910	Verb	Verbeekina Staff,1909	Verbeekina sinensis Nie et Song,1983	Qiangtang Block	2.8	2.88	south transitional zone	Y	Fusiform	27
Verbeekinidae Staff et Wedekina,1910	Verb	Verbeekina Staff,1909	Verbeekina iniqua Nie et Song,1983	Qiangtang Block	2.88	2.88	south transitional zone	Y	Fusiform	27
Verbeekinidae Staff et Wedekina,1910	Verb	Verbeekina Staff,1909	Verbeekina sinensis Nie et Song,1983	Qiangtang Block	2.92	3	south transitional zone	Y	Fusiform	27
Verbeekinidae Staff et Wedekina,1910	Verb	Verbeekina Staff,1909	Verbeekina verbeeki (Geinitz,1876)	Qiangtang Block	9.17	9.04	south transitional zone	Y	Fusiform	27
Neoschwagerinidae Dunbar et Condra,1927	Neo	Yabeina Deprat,1914	Yabeina longgensis Nie et Song,1983	Qiangtang Block	6.6	6.46	south transitional zone	Y	Fusiform	27
Schubertellidae Skinner,1931	Schu	Yangchienia Lee,1933	Yangchienia thompsoni Skinner et Wilde,1966	Qiangtang Block	3.2	1.4	south transitional zone	N	Fusiform	27
Neoschwagerinidae Dunbar et Condra,1927	Neo	Lepidolina Lee,1933	Lepidolina multiseptata (Deprat,1912)	South China	4.92	2.47	equatorial areas	Y	Fusiform	35	[22]
Neoschwagerinidae Dunbar et Condra,1927	Neo	Lepidolina Lee,1933	Lepidolina multiseptata (Deprat,1912)	South China	6.54	3.34	equatorial areas	Y	Fusiform	35
Neoschwagerinidae Dunbar et Condra,1927	Neo	Lepidolina Lee,1933	Lepidolina kumaensis Kanmera,1954	South China	8.48	3.37	equatorial areas	Y	Fusiform	35
Neoschwagerinidae Dunbar et Condra,1927	Neo	Lepidolina Lee,1933	Lepidolina multiseptata (Deprat,1912)	South China	5.5	3.4	equatorial areas	Y	Fusiform	35
Neoschwagerinidae Dunbar et Condra,1927	Neo	Lepidolina Lee,1933	Lepidolina kumaensis Kanmera,1954	South China	9.02	3.62	equatorial areas	Y	Fusiform	35
Neoschwagerinidae Dunbar et Condra,1927	Neo	Lepidolina Lee,1933	Lepidolina kumaensis Kanmera,1954	South China	8.59	3.68	equatorial areas	Y	Fusiform	35
Neoschwagerinidae Dunbar et Condra,1927	Neo	Lepidolina Lee,1933	Lepidolina multiseptata (Deprat,1912)	South China	6.9	3.77	equatorial areas	Y	Fusiform	35
Verbeekinidae Staff et Wedekina,1910	Verb	Pseudodoliolina Yabe et Hanzawa,1932	Pseudodoliolina gravitesta Kanmera,1954	South China	4.12	2.02	equatorial areas	Y	Fusiform	35
Verbeekinidae Staff et Wedekina,1910	Verb	Pseudodoliolina Yabe et Hanzawa,1932	Pseudodoliolina gravitesta Kanmera,1954	South China	6.64	3.09	equatorial areas	Y	Fusiform	35
Verbeekinidae Staff et Wedekina,1910	Verb	Pseudodoliolina Yabe et Hanzawa,1932	Pseudodoliolina gravitesta Kanmera,1954	South China	8.12	4	equatorial areas	Y	Fusiform	35
Neoschwagerinidae Dunbar et Condra,1927	Neo	Afghanella Thompson,1946	Afghanella schencki Thompson, 1946	Kunlun-Qadam Block	3	1.75	equatorial areas	Y	Fusiform	18	[23]
Schwagerinidae Dunbar et Henbest,1930	Schwag	Chusenella Hsu,1942	Chusenella sinensis Sheng,1963	Kunlun-Qadam Block	3.25	1	equatorial areas	Y	Fusiform	18
Schwagerinidae Dunbar et Henbest,1930	Schwag	Eopolydiexodina Wilde,1975	Eopolydiexodina persica (Kahler,1933)	Kunlun-Qadam Block	17.35	2.938	equatorial areas	Y	Fusiform	18
Schwagerinidae Dunbar et Henbest,1930	Schwag	Eopolydiexodina Wilde,1975	Eopolydiexodina persica (Kahler,1933)	Kunlun-Qadam Block	18.45	2.95	equatorial areas	Y	Fusiform	18
Schwagerinidae Dunbar et Henbest,1930	Schwag	Eopolydiexodina Wilde,1975	Eopolydiexodina persica (Kahler,1933)	Kunlun-Qadam Block	14.375	3.25	equatorial areas	Y	Fusiform	18
Schwagerinidae Dunbar et Henbest,1930	Schwag	Eopolydiexodina Wilde,1975	Eopolydiexodina persica (Kahler,1933)	Kunlun-Qadam Block	15.388	3.525	equatorial areas	Y	Fusiform	18
Schwagerinidae Dunbar et Henbest,1930	Schwag	Eopolydiexodina Wilde,1975	Eopolydiexodina afghanensis (Thompson,1946)	Kunlun-Qadam Block	19	4	equatorial areas	Y	Fusiform	18
Schwagerinidae Dunbar et Henbest,1930	Schwag	Eopolydiexodina Wilde,1975	Eopolydiexodina afghanensis (Thompson,1946)	Kunlun-Qadam Block	25	5.26	equatorial areas	Y	Fusiform	18
Schwagerinidae Dunbar et Henbest,1930	Schwag	Eopolydiexodina Wilde,1975	Eopolydiexodina afghanensis (Thompson,1946)	Kunlun-Qadam Block	54	7.8	equatorial areas	Y	Fusiform	18
Schwagerinidae Dunbar et Henbest,1930	Schwag	Parafusulina Dunbar et Skinner,1931	Parafusulina chekiangensis Chen,1934	Kunlun-Qadam Block	15	3.45	equatorial areas	Y	Fusiform	18
Schwagerinidae Dunbar et Henbest,1930	Schwag	Parafusulina Dunbar et Skinner,1931	Parafusulina chekiangensis Chen,1934	Kunlun-Qadam Block	12.18	3.96	equatorial areas	Y	Fusiform	18
Schwagerinidae Dunbar et Henbest,1930	Schwag	Rugosofusulina Rauser,1937	Rugosofusulina furoni (Thompson, 1946)	Kunlun-Qadam Block	3.6	2.45	equatorial areas	Y	Fusiform	18
Schubertellidae Skinner,1931	Schu	Wutuella Sheng,1963	Wutuella wutuensis (Kuo,1948)	Kunlun-Qadam Block	3	0.5	equatorial areas	N	Fusiform	18
Schubertellidae Skinner,1931	Schu	Yangchienia Lee,1933	Yangchienia tobleri Thompson,1935	Kunlun-Qadam Block	2.93	1.55	equatorial areas	N	Fusiform	18
Schubertellidae Skinner,1931	Schu	Yangchienia Lee,1933	Yangchienia tobleri Thompson,1935	Kunlun-Qadam Block	3.45	1.58	equatorial areas	N	Fusiform	18
Neoschwagerinidae Dunbar et Condra,1927	Neo	Afghanella Thompson,1946	Afghanella schencki Thompson, 1946	Kunlun-Qadam Block	3.44	2	equatorial areas	Y	Fusiform	18	[24]
Neoschwagerinidae Dunbar et Condra,1927	Neo	Afghanella Thompson,1946	Afghanella schencki Thompson, 1946	Kunlun-Qadam Block	4.6	2.57	equatorial areas	Y	Fusiform	18
Neoschwagerinidae Dunbar et Condra,1927	Neo	Afghanella Thompson,1946	Afghanella schencki Thompson, 1946	Kunlun-Qadam Block	6.19	2.65	equatorial areas	Y	Fusiform	18
Neoschwagerinidae Dunbar et Condra,1927	Neo	Cancellina Hayden,1909 emend Kanmera,1957	Cancellina primigena (Hayden, 1909)	Kunlun-Qadam Block	3.07	2	equatorial areas	Y	Fusiform	18
Schwagerinidae Dunbar et Henbest,1930	Schwag	Eopolydiexodina Wilde,1975	Eopolydiexodina praecursor Lloyd,1963	Kunlun-Qadam Block	14.02	2.08	equatorial areas	Y	Fusiform	18
Schwagerinidae Dunbar et Henbest,1930	Schwag	Eopolydiexodina Wilde,1975	Eopolydiexodina praecursor Lloyd,1963	Kunlun-Qadam Block	14.43	2.28	equatorial areas	Y	Fusiform	18
Schwagerinidae Dunbar et Henbest,1930	Schwag	Eopolydiexodina Wilde,1975	Eopolydiexodina douglasi Lloyd,1963	Kunlun-Qadam Block	15.86	2.35	equatorial areas	Y	Fusiform	18
Schwagerinidae Dunbar et Henbest,1930	Schwag	Eopolydiexodina Wilde,1975	Eopolydiexodina douglasi Lloyd,1963	Kunlun-Qadam Block	24.2	2.46	equatorial areas	Y	Fusiform	18
Schwagerinidae Dunbar et Henbest,1930	Schwag	Eopolydiexodina Wilde,1975	Eopolydiexodina douglasi Lloyd,1963	Kunlun-Qadam Block	20	2.67	equatorial areas	Y	Fusiform	18
Schwagerinidae Dunbar et Henbest,1930	Schwag	Eopolydiexodina Wilde,1975	Eopolydiexodina praecursor Lloyd,1963	Kunlun-Qadam Block	14.2	2.8	equatorial areas	Y	Fusiform	18
Schwagerinidae Dunbar et Henbest,1930	Schwag	Eopolydiexodina Wilde,1975	Eopolydiexodina douglasi Lloyd,1963	Kunlun-Qadam Block	19.77	2.87	equatorial areas	Y	Fusiform	18
Schwagerinidae Dunbar et Henbest,1930	Schwag	Eopolydiexodina Wilde,1975	Eopolydiexodina douglasi Lloyd,1963	Kunlun-Qadam Block	21.2	3	equatorial areas	Y	Fusiform	18
Schwagerinidae Dunbar et Henbest,1930	Schwag	Eopolydiexodina Wilde,1975	Eopolydiexodina praecursor Lloyd,1963	Kunlun-Qadam Block	17.36	3.1	equatorial areas	Y	Fusiform	18
Schwagerinidae Dunbar et Henbest,1930	Schwag	Eopolydiexodina Wilde,1975	Eopolydiexodina douglasi Lloyd,1963	Kunlun-Qadam Block	30	3.72	equatorial areas	Y	Fusiform	18
Schwagerinidae Dunbar et Henbest,1930	Schwag	Eopolydiexodina Wilde,1975	Eopolydiexodina douglasi Lloyd,1963	Kunlun-Qadam Block	38.1	4.14	equatorial areas	Y	Fusiform	18
Schubertellidae Skinner,1931	Schu	Toriyamaia Kanmera,1956	Toriyamaia laxiseptata Kanmera,1956	Kunlun-Qadam Block	1.95	0.63	equatorial areas	N	Fusiform	18
Schubertellidae Skinner,1931	Schu	Yangchienia Lee,1933	Yangchienia haydeni Thompson,1946	Kunlun-Qadam Block	2.86	1.41	equatorial areas	N	Fusiform	18
Schubertellidae Skinner,1931	Schu	Yangchienia Lee,1933	Yangchienia haydeni Thompson,1946	Kunlun-Qadam Block	2.84	1.5	equatorial areas	N	Fusiform	18
Schubertellidae Skinner,1931	Schu	Yangchienia Lee,1933	Yangchienia haydeni Thompson,1946	Kunlun-Qadam Block	2.84	1.72	equatorial areas	N	Fusiform	18
Neoschwagerinidae Dunbar et Condra,1927	Neo	Afghanella Thompson,1946	Afghanella schencki Thompson, 1946	South China	3.62	1.72	equatorial areas	Y	Fusiform	35	[25]
Neoschwagerinidae Dunbar et Condra,1927	Neo	Afghanella Thompson,1946	Afghanella schencki Thompson, 1946	South China	3.843	2.271	equatorial areas	Y	Fusiform	35
Neoschwagerinidae Dunbar et Condra,1927	Neo	Afghanella Thompson,1946	Afghanella megaspherica Sheng,1958	South China	4.143	2.571	equatorial areas	Y	Fusiform	35
Neoschwagerinidae Dunbar et Condra,1927	Neo	Afghanella Thompson,1946	Afghanella cheni Yang,1985	South China	6.17	2.72	equatorial areas	Y	Fusiform	35
Neoschwagerinidae Dunbar et Condra,1927	Neo	Afghanella Thompson,1946	Afghanella sumatrinaeformis (Gubler, 1935)	South China	4.757	2.971	equatorial areas	Y	Fusiform	35
Neoschwagerinidae Dunbar et Condra,1927	Neo	Afghanella Thompson,1946	Afghanella cheni Yang,1985	South China	7.92	3.68	equatorial areas	Y	Fusiform	35
Verbeekinidae Staff et Wedekina,1910	Verb	Armenina M.-Maclay,1955	Armenina crassispira (Chen,1956)	South China	3.66	3.72	equatorial areas	Y	Fusiform	35
Schwagerinidae Dunbar et Henbest,1930	Schwag	Chusenella Hsu,1942	Chusenella sinensis Sheng,1963	South China	4.92	1.78	equatorial areas	Y	Fusiform	35
Schwagerinidae Dunbar et Henbest,1930	Schwag	Chusenella Hsu,1942	Chusenella chihsiaensis (Lee,1931)	South China	6.1	2.18	equatorial areas	Y	Fusiform	35
Schwagerinidae Dunbar et Henbest,1930	Schwag	Chusenella Hsu,1942	Chusenella conicocylindrica Chen,1956	South China	5.18	2.5	equatorial areas	Y	Fusiform	35
Schwagerinidae Dunbar et Henbest,1930	Schwag	Chusenella Hsu,1942	Chusenella douvillei (Colani,1924)	South China	5.21	2.5	equatorial areas	Y	Fusiform	35
Neoschwagerinidae Dunbar et Condra,1927	Neo	Colania Lee,1933	Colania douvillei (Ozawa, 1925)	South China	5.96	3.82	equatorial areas	Y	Fusiform	35
Neoschwagerinidae Dunbar et Condra,1927	Neo	Gifuella Honjo,1959	Gifuella gifuensis Honjo,1959	South China	7.74	3.44	equatorial areas	Y	Fusiform	35
Verbeekinidae Staff et Wedekina,1910	Verb	Kahlerina Kochansky-Devidie et Ramovs,1955	Kahlerina ussurica (Sosnina,1956)	South China	1.489	1.822	equatorial areas	Y	Fusiform	35
Neoschwagerinidae Dunbar et Condra,1927	Neo	Lepidolina Lee,1933	Lepidolina multiseptata (Deprat,1912)	South China	6.72	4.68	equatorial areas	Y	Fusiform	35
Neoschwagerinidae Dunbar et Condra,1927	Neo	Lepidolina Lee,1933	Lepidolina kumaensis Kanmera,1954	South China	24.26	5.14	equatorial areas	Y	Fusiform	35
Verbeekinidae Staff et Wedekina,1910	Verb	Metadoliolina Ishii et Nogami,1961	Metadoliolina pulchra (Sheng,1963)	South China	5.671	3.243	equatorial areas	Y	Fusiform	35
Verbeekinidae Staff et Wedekina,1910	Verb	Metadoliolina Ishii et Nogami,1961	Metadoliolina multivoluta (Sheng,1963)	South China	5.82	4.24	equatorial areas	Y	Fusiform	35
Verbeekinidae Staff et Wedekina,1910	Verb	Metadoliolina Ishii et Nogami,1961	Metadoliolina bijieensis Liu,Dong et Xiao,1978	South China	5.56	5.1	equatorial areas	Y	Fusiform	35
Schubertellidae Skinner,1931	Schu	Neofusulinella Deprat,1912	Neofusulinella elongata Deprat	South China	3.311	1.522	equatorial areas	N	Fusiform	35
Neoschwagerinidae Dunbar et Condra,1927	Neo	Neoschwagerina Yabe,1903	Neoschwagerina simplex Ozawa,1927	South China	2.32	1.74	equatorial areas	Y	Fusiform	35
Neoschwagerinidae Dunbar et Condra,1927	Neo	Neoschwagerina Yabe,1903	Neoschwagerina craticulifera (Schwager, 1883)	South China	3.56	2.22	equatorial areas	Y	Fusiform	35
Neoschwagerinidae Dunbar et Condra,1927	Neo	Neoschwagerina Yabe,1903	Neoschwagerina schuberti Kochansky-Devide, 1958	South China	4.62	2.42	equatorial areas	Y	Fusiform	35
Neoschwagerinidae Dunbar et Condra,1927	Neo	Neoschwagerina Yabe,1903	Neoschwagerina kueichowensis Sheng,1963	South China	4.66	2.52	equatorial areas	Y	Fusiform	35
Neoschwagerinidae Dunbar et Condra,1927	Neo	Neoschwagerina Yabe,1903	Neoschwagerina fuwensis Morikawa and Suzuki, 1961	South China	4.52	2.68	equatorial areas	Y	Fusiform	35
Neoschwagerinidae Dunbar et Condra,1927	Neo	Neoschwagerina Yabe,1903	Neoschwagerina glintzboeckeli Skinner et Widle,1967	South China	3.64	2.88	equatorial areas	Y	Fusiform	35
Neoschwagerinidae Dunbar et Condra,1927	Neo	Neoschwagerina Yabe,1903	Neoschwagerina cheni Sheng,1958	South China	4.54	3.18	equatorial areas	Y	Fusiform	35
Neoschwagerinidae Dunbar et Condra,1927	Neo	Neoschwagerina Yabe,1903	Neoschwagerina simplex Ozawa,1927	South China	4.96	3.66	equatorial areas	Y	Fusiform	35
Neoschwagerinidae Dunbar et Condra,1927	Neo	Neoschwagerina Yabe,1903	Neoschwagerina haydeni Dutkevich and Khabakov, 1934	South China	5.58	3.8	equatorial areas	Y	Fusiform	35
Neoschwagerinidae Dunbar et Condra,1927	Neo	Neoschwagerina Yabe,1903	Neoschwagerina fusiformis Skinner and Wilde, 1967	South China	6.76	4.18	equatorial areas	Y	Fusiform	35
Neoschwagerinidae Dunbar et Condra,1927	Neo	Neoschwagerina Yabe,1903	Neoschwagerina hsinghaiana Sheng, 1958	South China	6.88	4.28	equatorial areas	Y	Fusiform	35
Neoschwagerinidae Dunbar et Condra,1927	Neo	Neoschwagerina Yabe,1903	Neoschwagerina margaritae Deprat, 1913	South China	5.44	4.3	equatorial areas	Y	Fusiform	35
Schwagerinidae Dunbar et Henbest,1930	Schwag	Parafusulina Dunbar et Skinner,1931	Parafusulina multiseptata (Schellwien,1898)	South China	8.24	3.58	equatorial areas	Y	Fusiform	35
Schwagerinidae Dunbar et Henbest,1930	Schwag	Parafusulina Dunbar et Skinner,1931	Parafusulina gigantea (Deprat,1913)	South China	16.2	6.16	equatorial areas	Y	Fusiform	35
Verbeekinidae Staff et Wedekina,1910	Verb	Paraverbeekina M.-Maclay,1955	Paraverbeekina pontica M.-Maclay,1955	South China	4.88	3.94	equatorial areas	Y	Fusiform	35
Verbeekinidae Staff et Wedekina,1910	Verb	Paraverbeekina M.-Maclay,1955	Paraverbeekina ellipsoidalis (Chen,1956)	South China	9.14	6.3	equatorial areas	Y	Fusiform	35
Staffellidae A.D.Miklukho-Maklay, 1949	Staff	Pisolina Lee,1933	Pisolina excessa Lee,1933	South China	4.8	5.18	equatorial areas	N	Lenticular	35
Neoschwagerinidae Dunbar et Condra,1927	Neo	Presumatrina Toumanskaya,1950	Presumatrina neoschwagerinoides (Deprat,1913)	South China	4.03	2.3	equatorial areas	Y	Fusiform	35
Neoschwagerinidae Dunbar et Condra,1927	Neo	Presumatrina Toumanskaya,1950	Presumatrina schellwieni (Deprat,1913)	South China	3.886	2.329	equatorial areas	Y	Fusiform	35
Verbeekinidae Staff et Wedekina,1910	Verb	Pseudodoliolina Yabe et Hanzawa,1932	Pseudodoliolina oliviformis Thompson, Wheeler and Danner, 1950	South China	4.557	2.057	equatorial areas	Y	Fusiform	35
Verbeekinidae Staff et Wedekina,1910	Verb	Pseudodoliolina Yabe et Hanzawa,1932	Pseudodoliolina pseudolepida (Deprat,1912)	South China	6.529	3.1	equatorial areas	Y	Fusiform	35
Ozawainellidae Thompson et Foster,1937	Oza	Rauserella Dunbar,1944	Rauserella erratica Dunbar,1944	South China	0.679	0.621	equatorial areas	N	Lenticular	35
Schwagerinidae Dunbar et Henbest,1930	Schwag	Schwagerina Moeller,1877	Schwagerina kwangchiensis Chen,1956	South China	4.92	1.54	equatorial areas	Y	Fusiform	35
Schwagerinidae Dunbar et Henbest,1930	Schwag	Schwagerina Moeller,1877	Schwagerina quasiregularis Sheng,1963	South China	4.62	1.6	equatorial areas	Y	Fusiform	35
Schwagerinidae Dunbar et Henbest,1930	Schwag	Schwagerina Moeller,1877	Schwagerina compacta (White,1932)	South China	6.96	2.58	equatorial areas	Y	Fusiform	35
Neoschwagerinidae Dunbar et Condra,1927	Neo	Sumatrina Volz,1904	Sumatrina annae Volz,1904	South China	5.343	2.157	equatorial areas	Y	Fusiform	35
Neoschwagerinidae Dunbar et Condra,1927	Neo	Sumatrina Volz,1904	Sumatrina fusiformis Sheng,1958	South China	7.114	2.429	equatorial areas	Y	Fusiform	35
Verbeekinidae Staff et Wedekina,1910	Verb	Verbeekina Staff,1909	Verbeekina grabaui Thompson et Foster,1937	South China	4.4	4.84	equatorial areas	Y	Fusiform	35
Verbeekinidae Staff et Wedekina,1910	Verb	Verbeekina Staff,1909	Verbeekina heimi Thompson et Foster,1937	South China	5.44	5.52	equatorial areas	Y	Fusiform	35
Verbeekinidae Staff et Wedekina,1910	Verb	Verbeekina Staff,1909	Verbeekina verbeeki (Geinitz,1876)	South China	7.8	8.175	equatorial areas	Y	Fusiform	35
Verbeekinidae Staff et Wedekina,1910	Verb	Verbeekina Staff,1909	Verbeekina tenuispira Sheng,1963	South China	8.4	8.575	equatorial areas	Y	Fusiform	35
Neoschwagerinidae Dunbar et Condra,1927	Neo	Yabeina Deprat,1914	Yabeina gubleri Kanmera,1954	South China	7.36	2.72	equatorial areas	Y	Fusiform	35
Neoschwagerinidae Dunbar et Condra,1927	Neo	Yabeina Deprat,1914	Yabeina kwangsiana (Lee,1933)	South China	7.94	3.9	equatorial areas	Y	Fusiform	35
Schubertellidae Skinner,1931	Schu	Yangchienia Lee,1933	Yangchienia tobleri Thompson,1935	South China	2.133	1.256	equatorial areas	N	Fusiform	35
Staffellidae A.D.Miklukho-Maklay, 1949	Staff	Chenia Sheng,1963	Chenia surccincta Chen J.R.,1985	Lhasa Block	1.87	3.85	south transitional zone	N	Lenticular	19	[26]
Staffellidae A.D.Miklukho-Maklay, 1949	Staff	Chenia Sheng,1963	Chenia surccincta Chen J.R.,1985	Lhasa Block	2	3.89	south transitional zone	N	Lenticular	19
Schwagerinidae Dunbar et Henbest,1930	Schwag	Chusenella Hsu,1942	Chusenella riagouensis Chen J.R.,1985	Lhasa Block	2.61	1.16	south transitional zone	Y	Fusiform	19
Schwagerinidae Dunbar et Henbest,1930	Schwag	Chusenella Hsu,1942	Chusenella schwagerinaeformis Sheng,1963	Lhasa Block	4.767	1.773	south transitional zone	Y	Fusiform	19
Schwagerinidae Dunbar et Henbest,1930	Schwag	Chusenella Hsu,1942	Chusenella schwagerinaeformis Sheng,1963	Lhasa Block	5.707	1.887	south transitional zone	Y	Fusiform	19
Schwagerinidae Dunbar et Henbest,1930	Schwag	Chusenella Hsu,1942	Chusenella quasireferta Chen J.R.,1985	Lhasa Block	5.51	2.31	south transitional zone	Y	Fusiform	19
Schwagerinidae Dunbar et Henbest,1930	Schwag	Chusenella Hsu,1942	Chusenella quasireferta Chen J.R.,1985	Lhasa Block	5.22	2.32	south transitional zone	Y	Fusiform	19
Schwagerinidae Dunbar et Henbest,1930	Schwag	Chusenella Hsu,1942	Chusenella quasireferta Chen J.R.,1985	Lhasa Block	5.22	2.46	south transitional zone	Y	Fusiform	19
Staffellidae A.D.Miklukho-Maklay, 1949	Staff	Nankinella Lee,1933	Nankinella laguensis Wang,Sheng et Zhang,1981	Lhasa Block	0.99	1.98	south transitional zone	N	Lenticular	19
Staffellidae A.D.Miklukho-Maklay, 1949	Staff	Nankinella Lee,1933	Nankinella hunanensis (Chen,1956)	Lhasa Block	2.492	4.508	south transitional zone	N	Lenticular	19
Staffellidae A.D.Miklukho-Maklay, 1949	Staff	Nankinella Lee,1933	Nankinella xainzaensis Chu,1982	Lhasa Block	3.05	4.95	south transitional zone	N	Lenticular	19
Staffellidae A.D.Miklukho-Maklay, 1949	Staff	Nankinella Lee,1933	Nankinella laguensis Wang,Sheng et Zhang,1981	Lhasa Block	3.02	5.1	south transitional zone	N	Lenticular	19
Staffellidae A.D.Miklukho-Maklay, 1949	Staff	Nankinella Lee,1933	Nankinella laguensis Wang,Sheng et Zhang,1981	Lhasa Block	2.9	5.22	south transitional zone	N	Lenticular	19
Staffellidae A.D.Miklukho-Maklay, 1949	Staff	Nankinella Lee,1933	Nankinella compacta Sheng	Lhasa Block	3.32	5.42	south transitional zone	N	Lenticular	19
Staffellidae A.D.Miklukho-Maklay, 1949	Staff	Nankinella Lee,1933	Nankinella compacta Sheng	Lhasa Block	3.458	5.583	south transitional zone	N	Lenticular	19
Staffellidae A.D.Miklukho-Maklay, 1949	Staff	Nankinella Lee,1933	Nankinella inflata (Colani,1924)	Lhasa Block	4.341	6.424	south transitional zone	N	Lenticular	19
Ozawainellidae Thompson et Foster,1937	Oza	Ozawainella Thompson,1935	Ozawainella provecta Yang,1978	Lhasa Block	0.88	1.93	south transitional zone	N	Lenticular	19
Staffellidae A.D.Miklukho-Maklay, 1949	Staff	Pisolina Lee,1933	Pisolina subspherica Sheng, 1956	Lhasa Block	1.88	2.03	south transitional zone	N	Lenticular	19
Schwagerinidae Dunbar et Henbest,1930	Schwag	Pseudofusulina Dunbar et Skinner,1931	Pseudofusulina xainzaensis Chen J.R.,1985	Lhasa Block	5.51	1.82	south transitional zone	Y	Fusiform	19
Schubertellidae Skinner,1931	Schu	Russiella M.-Maclay,1957	Russiella xialaensis Chen J.R.,1985	Lhasa Block	2.03	0.45	south transitional zone	N	Fusiform	19
Schwagerinidae Dunbar et Henbest,1930	Schwag	Schwagerina Moeller,1877	Schwagerina quasiregularis Sheng,1963	Lhasa Block	4.167	1.68	south transitional zone	Y	Fusiform	19
Schwagerinidae Dunbar et Henbest,1930	Schwag	Schwagerina Moeller,1877	Schwagerina pseudocompacta Sheng,1956	Lhasa Block	3.663	1.681	south transitional zone	Y	Fusiform	19
Schwagerinidae Dunbar et Henbest,1930	Schwag	Schwagerina Moeller,1877	Schwagerina pseudocompacta Sheng,1956	Lhasa Block	5.07	1.88	south transitional zone	Y	Fusiform	19
Verbeekinidae Staff et Wedekina,1910	Verb	Armenina M.-Maclay,1955	Armenina karinae A.D.Miklukho-Maklay, 1955	Lhasa Block	3.84	3.84	south transitional zone	Y	Fusiform	19	[27]
Schwagerinidae Dunbar et Henbest,1930	Schwag	Chusenella Hsu,1942	Chusenella wuhsuehensis (Chen,1956)	Lhasa Block	3.3	1.21	south transitional zone	Y	Fusiform	19
Schwagerinidae Dunbar et Henbest,1930	Schwag	Chusenella Hsu,1942	Chusenella xarlensis Wang et Zhou,1986	Lhasa Block	5.6	1.4	south transitional zone	Y	Fusiform	19
Schwagerinidae Dunbar et Henbest,1930	Schwag	Chusenella Hsu,1942	Chusenella tieni (Chen,1956)	Lhasa Block	4.2	1.42	south transitional zone	Y	Fusiform	19
Schwagerinidae Dunbar et Henbest,1930	Schwag	Chusenella Hsu,1942	Chusenella tieni (Chen,1956)	Lhasa Block	4.6	1.42	south transitional zone	Y	Fusiform	19
Schwagerinidae Dunbar et Henbest,1930	Schwag	Chusenella Hsu,1942	Chusenella dorashamensis Rosovskaya, 1965	Lhasa Block	3.15	1.45	south transitional zone	Y	Fusiform	19
Schwagerinidae Dunbar et Henbest,1930	Schwag	Chusenella Hsu,1942	Chusenella tieni (Chen,1956)	Lhasa Block	4.15	1.5	south transitional zone	Y	Fusiform	19
Schwagerinidae Dunbar et Henbest,1930	Schwag	Chusenella Hsu,1942	Chusenella schwagerinaeformis Sheng,1963	Lhasa Block	4.104	1.593	south transitional zone	Y	Fusiform	19
Schwagerinidae Dunbar et Henbest,1930	Schwag	Chusenella Hsu,1942	Chusenella tingi Chen,1956	Lhasa Block	4.1	1.7	south transitional zone	Y	Fusiform	19
Schwagerinidae Dunbar et Henbest,1930	Schwag	Chusenella Hsu,1942	Chusenella schwagerinaeformis Sheng,1963	Lhasa Block	4.333	1.815	south transitional zone	Y	Fusiform	19
Schwagerinidae Dunbar et Henbest,1930	Schwag	Chusenella Hsu,1942	Chusenella sinensis Sheng,1963	Lhasa Block	5	1.84	south transitional zone	Y	Fusiform	19
Schwagerinidae Dunbar et Henbest,1930	Schwag	Chusenella Hsu,1942	Chusenella dorashamensis Rosovskaya, 1965	Lhasa Block	4	1.9	south transitional zone	Y	Fusiform	19
Schwagerinidae Dunbar et Henbest,1930	Schwag	Chusenella Hsu,1942	Chusenella xarlensis Wang et Zhou,1986	Lhasa Block	5.01	2.05	south transitional zone	Y	Fusiform	19
Schwagerinidae Dunbar et Henbest,1930	Schwag	Chusenella Hsu,1942	Chusenella xarlensis Wang et Zhou,1986	Lhasa Block	5	2.1	south transitional zone	Y	Fusiform	19
Schwagerinidae Dunbar et Henbest,1930	Schwag	Chusenella Hsu,1942	Chusenella xarlensis Wang et Zhou,1986	Lhasa Block	5.6	2.1	south transitional zone	Y	Fusiform	19
Schwagerinidae Dunbar et Henbest,1930	Schwag	Chusenella Hsu,1942	Chusenella xarlensis Wang et Zhou,1986	Lhasa Block	5.2	2.15	south transitional zone	Y	Fusiform	19
Schwagerinidae Dunbar et Henbest,1930	Schwag	Chusenella Hsu,1942	Chusenella tingi Chen,1956	Lhasa Block	5.1	2.2	south transitional zone	Y	Fusiform	19
Schwagerinidae Dunbar et Henbest,1930	Schwag	Chusenella Hsu,1942	Chusenella schwagerinaeformis Sheng,1963	Lhasa Block	5.629	2.222	south transitional zone	Y	Fusiform	19
Schwagerinidae Dunbar et Henbest,1930	Schwag	Chusenella Hsu,1942	Chusenella xarlensis Wang et Zhou,1986	Lhasa Block	6.7	2.45	south transitional zone	Y	Fusiform	19
Schwagerinidae Dunbar et Henbest,1930	Schwag	Chusenella Hsu,1942	Chusenella sinensis Sheng,1963	Lhasa Block	6.8	2.5	south transitional zone	Y	Fusiform	19
Schwagerinidae Dunbar et Henbest,1930	Schwag	Chusenella Hsu,1942	Chusenella quasireferta Chen J.R.,1985	Lhasa Block	6.2	2.6	south transitional zone	Y	Fusiform	19
Schwagerinidae Dunbar et Henbest,1930	Schwag	Chusenella Hsu,1942	Chusenella quasireferta Chen J.R.,1985	Lhasa Block	5.4	2.7	south transitional zone	Y	Fusiform	19
Schwagerinidae Dunbar et Henbest,1930	Schwag	Chusenella Hsu,1942	Chusenella quasireferta Chen J.R.,1985	Lhasa Block	5.7	2.7	south transitional zone	Y	Fusiform	19
Schwagerinidae Dunbar et Henbest,1930	Schwag	Chusenella Hsu,1942	Chusenella xarlensis Wang et Zhou,1986	Lhasa Block	7.1	2.75	south transitional zone	Y	Fusiform	19
Schwagerinidae Dunbar et Henbest,1930	Schwag	Chusenella Hsu,1942	Chusenella quasireferta Chen J.R.,1985	Lhasa Block	5.8	2.85	south transitional zone	Y	Fusiform	19
Schwagerinidae Dunbar et Henbest,1930	Schwag	Chusenella Hsu,1942	Chusenella quasireferta Chen J.R.,1985	Lhasa Block	6.16	3.1	south transitional zone	Y	Fusiform	19
Staffellidae A.D.Miklukho-Maklay, 1949	Staff	Nankinella Lee,1933	Nankinella rarivoluta Wang,Sheng et Zhang,1981	Lhasa Block	1.242	1.944	south transitional zone	N	Lenticular	19
Staffellidae A.D.Miklukho-Maklay, 1949	Staff	Nankinella Lee,1933	Nankinella hunanensis (Chen,1956)	Lhasa Block	1.5	2.74	south transitional zone	N	Lenticular	19
Staffellidae A.D.Miklukho-Maklay, 1949	Staff	Nankinella Lee,1933	Nankinella hunanensis (Chen,1956)	Lhasa Block	1.6	2.8	south transitional zone	N	Lenticular	19
Staffellidae A.D.Miklukho-Maklay, 1949	Staff	Nankinella Lee,1933	Nankinella inflata (Colani,1924)	Lhasa Block	1.908	2.808	south transitional zone	N	Lenticular	19
Staffellidae A.D.Miklukho-Maklay, 1949	Staff	Nankinella Lee,1933	Nankinella quasihunanensis Sheng,1963	Lhasa Block	1.638	2.916	south transitional zone	N	Lenticular	19
Staffellidae A.D.Miklukho-Maklay, 1949	Staff	Nankinella Lee,1933	Nankinella hunanensis (Chen,1956)	Lhasa Block	1.64	3	south transitional zone	N	Lenticular	19
Staffellidae A.D.Miklukho-Maklay, 1949	Staff	Nankinella Lee,1933	Nankinella xainzaensis Chu,1982	Lhasa Block	2.3	3.3	south transitional zone	N	Lenticular	19
Staffellidae A.D.Miklukho-Maklay, 1949	Staff	Nankinella Lee,1933	Nankinella hunanensis (Chen,1956)	Lhasa Block	1.74	3.34	south transitional zone	N	Lenticular	19
Staffellidae A.D.Miklukho-Maklay, 1949	Staff	Nankinella Lee,1933	Nankinella laguensis Wang,Sheng et Zhang,1981	Lhasa Block	1.818	3.654	south transitional zone	N	Lenticular	19
Staffellidae A.D.Miklukho-Maklay, 1949	Staff	Nankinella Lee,1933	Nankinella nanjiangensis Chang and Wang, 1974	Lhasa Block	2.16	3.9	south transitional zone	N	Lenticular	19
Staffellidae A.D.Miklukho-Maklay, 1949	Staff	Nankinella Lee,1933	Nankinella nanjiangensis Chang and Wang, 1974	Lhasa Block	2.4	4	south transitional zone	N	Lenticular	19
Staffellidae A.D.Miklukho-Maklay, 1949	Staff	Nankinella Lee,1933	Nankinella nanjiangensis Chang and Wang, 1974	Lhasa Block	2.45	4.2	south transitional zone	N	Lenticular	19
Staffellidae A.D.Miklukho-Maklay, 1949	Staff	Nankinella Lee,1933	Nankinella laguensis Wang,Sheng et Zhang,1981	Lhasa Block	2.22	4.346	south transitional zone	N	Lenticular	19
Staffellidae A.D.Miklukho-Maklay, 1949	Staff	Nankinella Lee,1933	Nankinella nanjiangensis Chang and Wang, 1974	Lhasa Block	3.5	5.7	south transitional zone	N	Lenticular	19
Staffellidae A.D.Miklukho-Maklay, 1949	Staff	Nankinella Lee,1933	Nankinella xainzaensis Chu,1982	Lhasa Block	3.9	6.1	south transitional zone	N	Lenticular	19
Staffellidae A.D.Miklukho-Maklay, 1949	Staff	Nankinella Lee,1933	Nankinella xainzaensis Chu,1982	Lhasa Block	4.3	6.5	south transitional zone	N	Lenticular	19
Neoschwagerinidae Dunbar et Condra,1927	Neo	Neoschwagerina Yabe,1903	Neoschwagerina margaritae Deprat, 1913	Lhasa Block	2.835	2.295	south transitional zone	Y	Fusiform	19
Schwagerinidae Dunbar et Henbest,1930	Schwag	Schwagerina Moeller,1877	Schwagerina longitermina Chen,1956	Lhasa Block	9.22	3.1	south transitional zone	Y	Fusiform	19
Staffellidae A.D.Miklukho-Maklay, 1949	Staff	Staffella Ozawa,1925	Staffella xainzensis Wang et Zhou,1986	Lhasa Block	1.9	2.01	south transitional zone	N	Lenticular	19
Staffellidae A.D.Miklukho-Maklay, 1949	Staff	Staffella Ozawa,1925	Staffella xainzensis Wang et Zhou,1986	Lhasa Block	2.01	2.2	south transitional zone	N	Lenticular	19
Staffellidae A.D.Miklukho-Maklay, 1949	Staff	Staffella Ozawa,1925	Staffella xainzensis Wang et Zhou,1986	Lhasa Block	2.3	2.5	south transitional zone	N	Lenticular	19
Staffellidae A.D.Miklukho-Maklay, 1949	Staff	Staffella Ozawa,1925	Staffella xainzensis Wang et Zhou,1986	Lhasa Block	2.47	2.51	south transitional zone	N	Lenticular	19
Verbeekinidae Staff et Wedekina,1910	Verb	Verbeekina Staff,1909	Verbeekina verbeeki (Geinitz,1876)	Lhasa Block	3.915	3.834	south transitional zone	Y	Fusiform	19
Neoschwagerinidae Dunbar et Condra,1927	Neo	Neoschwagerina Yabe,1903	Neoschwagerina kueichowensis Sheng,1963	Karakorum	4	2.11	south transitional zone	Y	Fusiform	16	[28]
Neoschwagerinidae Dunbar et Condra,1927	Neo	Neoschwagerina Yabe,1903	Neoschwagerina simplex Ozawa,1927	Karakorum	3.7	3.14	south transitional zone	Y	Fusiform	16
Schwagerinidae Dunbar et Henbest,1930	Schwag	Chusenella Hsu,1942	Chusenella douvillei (Colani,1924)	Qiangtang Block	5.9	2.86	south transitional zone	Y	Fusiform	27	[29]
Verbeekinidae Staff et Wedekina,1910	Verb	Metadoliolina Ishii et Nogami,1961	Metadoliolina aulaensis (Nie et Song,1990)	Qiangtang Block	3	2.32	south transitional zone	Y	Fusiform	27
Verbeekinidae Staff et Wedekina,1910	Verb	Metadoliolina Ishii et Nogami,1961	Metadoliolina aulaensis (Nie et Song,1990)	Qiangtang Block	3.6	2.4	south transitional zone	Y	Fusiform	27
Neoschwagerinidae Dunbar et Condra,1927	Neo	Neoschwagerina Yabe,1903	Neoschwagerina simplex Ozawa,1927	Qiangtang Block	2.79	2.09	south transitional zone	Y	Fusiform	27
Neoschwagerinidae Dunbar et Condra,1927	Neo	Neoschwagerina Yabe,1903	Neoschwagerina craticulifera (Schwager, 1883)	Qiangtang Block	4.21	2.94	south transitional zone	Y	Fusiform	27
Neoschwagerinidae Dunbar et Condra,1927	Neo	Neoschwagerina Yabe,1903	Neoschwagerina margaritae Deprat, 1913	Qiangtang Block	4.64	3.16	south transitional zone	Y	Fusiform	27
Neoschwagerinidae Dunbar et Condra,1927	Neo	Neoschwagerina Yabe,1903	Neoschwagerina margaritae Deprat, 1913	Qiangtang Block	4.59	3.53	south transitional zone	Y	Fusiform	27
Neoschwagerinidae Dunbar et Condra,1927	Neo	Neoschwagerina Yabe,1903	Neoschwagerina margaritae Deprat, 1913	Qiangtang Block	4.04	3.75	south transitional zone	Y	Fusiform	27
Neoschwagerinidae Dunbar et Condra,1927	Neo	Neoschwagerina Yabe,1903	Neoschwagerina colaniae Ozawa,1927	Qiangtang Block	5.18	3.75	south transitional zone	Y	Fusiform	27
Neoschwagerinidae Dunbar et Condra,1927	Neo	Neoschwagerina Yabe,1903	Neoschwagerina margaritae Deprat, 1913	Qiangtang Block	4.96	4.52	south transitional zone	Y	Fusiform	27
Neoschwagerinidae Dunbar et Condra,1927	Neo	Neoschwagerina Yabe,1903	Neoschwagerina margaritae Deprat, 1913	Qiangtang Block	5.52	5.2	south transitional zone	Y	Fusiform	27
Schwagerinidae Dunbar et Henbest,1930	Schwag	Rugososchwagerina M.-Maclay,1956	Rugososchwagerina coquenensis Nie et Song,1990	Qiangtang Block	8.52	5.16	south transitional zone	Y	Fusiform	27
Schwagerinidae Dunbar et Henbest,1930	Schwag	Rugososchwagerina M.-Maclay,1956	Rugososchwagerina coquenensis Nie et Song,1990	Qiangtang Block	8.8	5.2	south transitional zone	Y	Fusiform	27
Schwagerinidae Dunbar et Henbest,1930	Schwag	Rugososchwagerina M.-Maclay,1956	Rugososchwagerina coquenensis Nie et Song,1990	Qiangtang Block	11.2	5.72	south transitional zone	Y	Fusiform	27
Verbeekinidae Staff et Wedekina,1910	Verb	Verbeekina Staff,1909	Verbeekina grabaui Thompson et Foster,1937	Qiangtang Block	4.23	4.37	south transitional zone	Y	Fusiform	27
Schubertellidae Skinner,1931	Schu	Yangchienia Lee,1933	Yangchienia compressa (Ozawa,1927)	Qiangtang Block	1.83	1.23	south transitional zone	N	Fusiform	27
Neoschwagerinidae Dunbar et Condra,1927	Neo	Afghanella Thompson,1946	Afghanella megaspherica Sheng,1958	Kunlun-Qadam Block	2.4	1.5	equatorial areas	Y	Fusiform	18	[30]
Neoschwagerinidae Dunbar et Condra,1927	Neo	Afghanella Thompson,1946	Afghanella tumida Skinner and Wilde, 1967	Kunlun-Qadam Block	3	2	equatorial areas	Y	Fusiform	18
Neoschwagerinidae Dunbar et Condra,1927	Neo	Afghanella Thompson,1946	Afghanella tumida Skinner and Wilde, 1967	Kunlun-Qadam Block	3	2.05	equatorial areas	Y	Fusiform	18
Neoschwagerinidae Dunbar et Condra,1927	Neo	Afghanella Thompson,1946	Afghanella tumida Skinner and Wilde, 1967	Kunlun-Qadam Block	3.9	2.6	equatorial areas	Y	Fusiform	18
Neoschwagerinidae Dunbar et Condra,1927	Neo	Afghanella Thompson,1946	Afghanella tumida Skinner and Wilde, 1967	Kunlun-Qadam Block	4.5	2.6	equatorial areas	Y	Fusiform	18
Schwagerinidae Dunbar et Henbest,1930	Schwag	Chalaroschwagerina Skinner et Wilde,1965	Chalaroschwagerina nelsoni opima Thompson	Kunlun-Qadam Block	5.2	3.1	equatorial areas	Y	Fusiform	18
Schwagerinidae Dunbar et Henbest,1930	Schwag	Chusenella Hsu,1942	Chusenella minuta Skinner, 1969	Kunlun-Qadam Block	4.25	2.3	equatorial areas	Y	Fusiform	18
Neoschwagerinidae Dunbar et Condra,1927	Neo	Colania Lee,1933	Colania douvillei (Ozawa, 1925)	Kunlun-Qadam Block	7.8	4.75	equatorial areas	Y	Fusiform	18
Schubertellidae Skinner,1931	Schu	Dunbarula Ciry,1948	Dunbarula nana Kochansky-Devide et Ramovs,1955	Kunlun-Qadam Block	0.8	0.5	equatorial areas	N	Fusiform	18
Schubertellidae Skinner,1931	Schu	Dunbarula Ciry,1948	Dunbarula pusilla Skinner,1969	Kunlun-Qadam Block	1.25	0.5	equatorial areas	N	Fusiform	18
Schwagerinidae Dunbar et Henbest,1930	Schwag	Eopolydiexodina Wilde,1975	Eopolydiexodina douglasi Lloyd,1963	Kunlun-Qadam Block	5.1	1.8	equatorial areas	Y	Fusiform	18
Schwagerinidae Dunbar et Henbest,1930	Schwag	Eopolydiexodina Wilde,1975	Eopolydiexodina douglasi Lloyd,1963	Kunlun-Qadam Block	18	3.35	equatorial areas	Y	Fusiform	18
Schubertellidae Skinner,1931	Schu	Lantschichites Toumanskaya,1953	Lantschichites kalamulunica Wang,Sheng et Zhang,1981	Kunlun-Qadam Block	3.6	1.65	equatorial areas	N	Fusiform	18
Staffellidae A.D.Miklukho-Maklay, 1949	Staff	Nankinella Lee,1933	Nankinella delicata Zhou	Kunlun-Qadam Block	2.5	2.85	equatorial areas	N	Lenticular	18
Neoschwagerinidae Dunbar et Condra,1927	Neo	Neoschwagerina Yabe,1903	Neoschwagerina kueichowensis Sheng,1963	Kunlun-Qadam Block	4.1	2.2	equatorial areas	Y	Fusiform	18
Neoschwagerinidae Dunbar et Condra,1927	Neo	Neoschwagerina Yabe,1903	Neoschwagerina kueichowensis Sheng,1963	Kunlun-Qadam Block	6	3.75	equatorial areas	Y	Fusiform	18
Neoschwagerinidae Dunbar et Condra,1927	Neo	Neoschwagerina Yabe,1903	Neoschwagerina haydeni Dutkevich and Khabakov, 1934	Kunlun-Qadam Block	6	4.25	equatorial areas	Y	Fusiform	18
Neoschwagerinidae Dunbar et Condra,1927	Neo	Neoschwagerina Yabe,1903	Neoschwagerina margaritae Deprat, 1913	Kunlun-Qadam Block	5.5	4.5	equatorial areas	Y	Fusiform	18
Neoschwagerinidae Dunbar et Condra,1927	Neo	Neoschwagerina Yabe,1903	Neoschwagerina margaritae Deprat, 1913	Kunlun-Qadam Block	5.3	4.6	equatorial areas	Y	Fusiform	18
Neoschwagerinidae Dunbar et Condra,1927	Neo	Neoschwagerina Yabe,1903	Neoschwagerina hukoensis K.Miklukho-Maclay, 1954	Kunlun-Qadam Block	5.8	4.6	equatorial areas	Y	Fusiform	18
Neoschwagerinidae Dunbar et Condra,1927	Neo	Neoschwagerina Yabe,1903	Neoschwagerina hukoensis K.Miklukho-Maclay, 1954	Kunlun-Qadam Block	6.25	4.9	equatorial areas	Y	Fusiform	18
Neoschwagerinidae Dunbar et Condra,1927	Neo	Neoschwagerina Yabe,1903	Neoschwagerina haydeni Dutkevich and Khabakov, 1934	Kunlun-Qadam Block	7	4.9	equatorial areas	Y	Fusiform	18
Neoschwagerinidae Dunbar et Condra,1927	Neo	Neoschwagerina Yabe,1903	Neoschwagerina hukoensis K.Miklukho-Maclay, 1954	Kunlun-Qadam Block	6	5	equatorial areas	Y	Fusiform	18
Verbeekinidae Staff et Wedekina,1910	Verb	Paraverbeekina M.-Maclay,1955	Paraverbeekina pontica M.-Maclay,1955	Kunlun-Qadam Block	4.25	3.15	equatorial areas	Y	Fusiform	18
Schwagerinidae Dunbar et Henbest,1930	Schwag	Pseudofusulina Dunbar et Skinner,1931	Pseudofusulina huangyanglingensis Sun,1993	Kunlun-Qadam Block	4.9	1.65	equatorial areas	Y	Fusiform	18
Schwagerinidae Dunbar et Henbest,1930	Schwag	Schwagerina Moeller,1877	Schwagerina yematanensis Sun,1993	Kunlun-Qadam Block	6.25	2.1	equatorial areas	Y	Fusiform	18
Schwagerinidae Dunbar et Henbest,1930	Schwag	Schwagerina Moeller,1877	Schwagerina yematanensis Sun,1993	Kunlun-Qadam Block	7.65	2.4	equatorial areas	Y	Fusiform	18
Schwagerinidae Dunbar et Henbest,1930	Schwag	Schwagerina Moeller,1877	Schwagerina yematanensis Sun,1993	Kunlun-Qadam Block	7.75	2.4	equatorial areas	Y	Fusiform	18
Schwagerinidae Dunbar et Henbest,1930	Schwag	Schwagerina Moeller,1877	Schwagerina yematanensis Sun,1993	Kunlun-Qadam Block	7.75	2.75	equatorial areas	Y	Fusiform	18
Schwagerinidae Dunbar et Henbest,1930	Schwag	Schwagerina Moeller,1877	Schwagerina huangyanglingensis Sun,1993	Kunlun-Qadam Block	5	3.45	equatorial areas	Y	Fusiform	18
Staffellidae A.D.Miklukho-Maklay, 1949	Staff	Staffella Ozawa,1925	Staffella moellerana Thompson,1935	Kunlun-Qadam Block	2.5	3.7	equatorial areas	N	Lenticular	18
Neoschwagerinidae Dunbar et Condra,1927	Neo	Sumatrina Volz,1904	Sumatrina annae Volz,1904	Kunlun-Qadam Block	3.35	1.4	equatorial areas	Y	Fusiform	18
Neoschwagerinidae Dunbar et Condra,1927	Neo	Sumatrina Volz,1904	Sumatrina annae Volz,1904	Kunlun-Qadam Block	4	1.7	equatorial areas	Y	Fusiform	18
Neoschwagerinidae Dunbar et Condra,1927	Neo	Sumatrina Volz,1904	Sumatrina annae Volz,1904	Kunlun-Qadam Block	6.4	2.4	equatorial areas	Y	Fusiform	18
Neoschwagerinidae Dunbar et Condra,1927	Neo	Sumatrina Volz,1904	Sumatrina annae Volz,1904	Kunlun-Qadam Block	6.5	2.65	equatorial areas	Y	Fusiform	18
Neoschwagerinidae Dunbar et Condra,1927	Neo	Sumatrina Volz,1904	Sumatrina annae Volz,1904	Kunlun-Qadam Block	7.65	3	equatorial areas	Y	Fusiform	18
Verbeekinidae Staff et Wedekina,1910	Verb	Verbeekina Staff,1909	Verbeekina verbeeki (Geinitz,1876)	Kunlun-Qadam Block	4.6	4.1	equatorial areas	Y	Fusiform	18
Verbeekinidae Staff et Wedekina,1910	Verb	Verbeekina Staff,1909	Verbeekina heimi Thompson et Foster,1937	Kunlun-Qadam Block	5.9	5.25	equatorial areas	Y	Fusiform	18
Verbeekinidae Staff et Wedekina,1910	Verb	Verbeekina Staff,1909	Verbeekina heimi Thompson et Foster,1937	Kunlun-Qadam Block	5.75	5.4	equatorial areas	Y	Fusiform	18
Verbeekinidae Staff et Wedekina,1910	Verb	Verbeekina Staff,1909	Verbeekina verbeeki (Geinitz,1876)	Kunlun-Qadam Block	8	7.65	equatorial areas	Y	Fusiform	18
Verbeekinidae Staff et Wedekina,1910	Verb	Verbeekina Staff,1909	Verbeekina verbeeki (Geinitz,1876)	Kunlun-Qadam Block	9	8.8	equatorial areas	Y	Fusiform	18
Schubertellidae Skinner,1931	Schu	Yangchienia Lee,1933	Yangchienia iniqua Lee,1933	Kunlun-Qadam Block	1.7	1.05	equatorial areas	N	Fusiform	18
Schubertellidae Skinner,1931	Schu	Yangchienia Lee,1933	Yangchienia compressa (Ozawa,1927)	Kunlun-Qadam Block	2.5	1.25	equatorial areas	N	Fusiform	18
Neoschwagerinidae Dunbar et Condra,1927	Neo	Afghanella Thompson,1946	Afghanella elliptica Zhu et H.Partoazar,1996	Sanandaj-Sirjan zone of Iran	4.76	2.05	equatorial areas	Y	Fusiform	30	[31]
Neoschwagerinidae Dunbar et Condra,1927	Neo	Afghanella Thompson,1946	Afghanella elliptica Zhu et H.Partoazar,1996	Sanandaj-Sirjan zone of Iran	4.51	2.13	equatorial areas	Y	Fusiform	30
Neoschwagerinidae Dunbar et Condra,1927	Neo	Afghanella Thompson,1946	Afghanella elongata Zhu et H.Partoazar,1996	Sanandaj-Sirjan zone of Iran	6.38	2.16	equatorial areas	Y	Fusiform	30
Neoschwagerinidae Dunbar et Condra,1927	Neo	Afghanella Thompson,1946	Afghanella elliptica Zhu et H.Partoazar,1996	Sanandaj-Sirjan zone of Iran	5.05	2.34	equatorial areas	Y	Fusiform	30
Neoschwagerinidae Dunbar et Condra,1927	Neo	Afghanella Thompson,1946	Afghanella elongata Zhu et H.Partoazar,1996	Sanandaj-Sirjan zone of Iran	7.53	2.49	equatorial areas	Y	Fusiform	30
Neoschwagerinidae Dunbar et Condra,1927	Neo	Afghanella Thompson,1946	Afghanella elongata Zhu et H.Partoazar,1996	Sanandaj-Sirjan zone of Iran	3.75	2.66	equatorial areas	Y	Fusiform	30
Neoschwagerinidae Dunbar et Condra,1927	Neo	Sumatrina Volz,1904	Sumatrina annae Volz,1904	Sanandaj-Sirjan zone of Iran	5.55	1.59	equatorial areas	Y	Fusiform	30
Neoschwagerinidae Dunbar et Condra,1927	Neo	Sumatrina Volz,1904	Sumatrina annae Volz,1904	Sanandaj-Sirjan zone of Iran	5.21	1.81	equatorial areas	Y	Fusiform	30
Neoschwagerinidae Dunbar et Condra,1927	Neo	Sumatrina Volz,1904	Sumatrina annae Volz,1904	Sanandaj-Sirjan zone of Iran	6.8	2.23	equatorial areas	Y	Fusiform	30
Neoschwagerinidae Dunbar et Condra,1927	Neo	Afghanella Thompson,1946	Afghanella schencki Thompson, 1946	South China	3.12	1.713	equatorial areas	Y	Fusiform	35	[32]
Neoschwagerinidae Dunbar et Condra,1927	Neo	Afghanella Thompson,1946	Afghanella schencki Thompson, 1946	South China	3.307	2.087	equatorial areas	Y	Fusiform	35
Neoschwagerinidae Dunbar et Condra,1927	Neo	Colania Lee,1933	Colania douvillei (Ozawa, 1925)	South China	5.39	3.57	equatorial areas	Y	Fusiform	35
Neoschwagerinidae Dunbar et Condra,1927	Neo	Neoschwagerina Yabe,1903	Neoschwagerina simplex Ozawa,1927	South China	3.06	2.17	equatorial areas	Y	Fusiform	35
Neoschwagerinidae Dunbar et Condra,1927	Neo	Neoschwagerina Yabe,1903	Neoschwagerina simplex Ozawa,1927	South China	3.14	2.42	equatorial areas	Y	Fusiform	35
Neoschwagerinidae Dunbar et Condra,1927	Neo	Neoschwagerina Yabe,1903	Neoschwagerina kueichowensis Sheng,1963	South China	4.83	2.96	equatorial areas	Y	Fusiform	35
Neoschwagerinidae Dunbar et Condra,1927	Neo	Neoschwagerina Yabe,1903	Neoschwagerina kueichowensis Sheng,1963	South China	5.13	3.16	equatorial areas	Y	Fusiform	35
Neoschwagerinidae Dunbar et Condra,1927	Neo	Neoschwagerina Yabe,1903	Neoschwagerina craticulifera (Schwager, 1883)	South China	4.7	3.27	equatorial areas	Y	Fusiform	35
Neoschwagerinidae Dunbar et Condra,1927	Neo	Neoschwagerina Yabe,1903	Neoschwagerina craticulifera (Schwager, 1883)	South China	4.78	3.27	equatorial areas	Y	Fusiform	35
Neoschwagerinidae Dunbar et Condra,1927	Neo	Neoschwagerina Yabe,1903	Neoschwagerina colaniae Ozawa,1927	South China	4.69	3.82	equatorial areas	Y	Fusiform	35
Neoschwagerinidae Dunbar et Condra,1927	Neo	Neoschwagerina Yabe,1903	Neoschwagerina cheni Sheng,1958	South China	5.41	4.05	equatorial areas	Y	Fusiform	35
Neoschwagerinidae Dunbar et Condra,1927	Neo	Sumatrina Volz,1904	Sumatrina annae Volz,1904	South China	4.34	2.04	equatorial areas	Y	Fusiform	35
Neoschwagerinidae Dunbar et Condra,1927	Neo	Yabeina Deprat,1914	Yabeina katoi (Ozawa, 1927)	South China	4.9	3.72	equatorial areas	Y	Fusiform	35
Neoschwagerinidae Dunbar et Condra,1927	Neo	Yabeina Deprat,1914	Yabeina kwangsiana (Lee,1933)	South China	7.01	3.79	equatorial areas	Y	Fusiform	35
Verbeekinidae Staff et Wedekina,1910	Verb	Metadoliolina Ishii et Nogami,1961	Metadoliolina pulchra (Sheng,1963)	South China	3.49	2.43	equatorial areas	Y	Fusiform	35	[33]
Verbeekinidae Staff et Wedekina,1910	Verb	Metadoliolina Ishii et Nogami,1961	Metadoliolina pulchra (Sheng,1963)	South China	5.13	2.76	equatorial areas	Y	Fusiform	35
Verbeekinidae Staff et Wedekina,1910	Verb	Metadoliolina Ishii et Nogami,1961	Metadoliolina pulchra (Sheng,1963)	South China	4.86	3.42	equatorial areas	Y	Fusiform	35
Verbeekinidae Staff et Wedekina,1910	Verb	Metadoliolina Ishii et Nogami,1961	Metadoliolina sphaeroidea (Sheng,1963)	South China	4.14	3.61	equatorial areas	Y	Fusiform	35
Verbeekinidae Staff et Wedekina,1910	Verb	Pseudodoliolina Yabe et Hanzawa,1932	Pseudodoliolina ozawai Yabe et Hanzawa,1932	South China	3.61	1.34	equatorial areas	Y	Fusiform	35
Verbeekinidae Staff et Wedekina,1910	Verb	Pseudodoliolina Yabe et Hanzawa,1932	Pseudodoliolina pseudolepida (Deprat,1912)	South China	3.09	1.98	equatorial areas	Y	Fusiform	35
Verbeekinidae Staff et Wedekina,1910	Verb	Pseudodoliolina Yabe et Hanzawa,1932	Pseudodoliolina pseudolepida (Deprat,1912)	South China	3.27	2	equatorial areas	Y	Fusiform	35
Verbeekinidae Staff et Wedekina,1910	Verb	Pseudodoliolina Yabe et Hanzawa,1932	Pseudodoliolina pseudolepida (Deprat,1912)	South China	5.68	2.5	equatorial areas	Y	Fusiform	35
Verbeekinidae Staff et Wedekina,1910	Verb	Pseudodoliolina Yabe et Hanzawa,1932	Pseudodoliolina pseudolepida (Deprat,1912)	South China	6.38	3.78	equatorial areas	Y	Fusiform	35
Neoschwagerinidae Dunbar et Condra,1927	Neo	Afghanella Thompson,1946	Afghanella schencki Thompson, 1946	Kunlun-Qadam Block	5.16	2.84	equatorial areas	Y	Fusiform	18	[34]
Schwagerinidae Dunbar et Henbest,1930	Schwag	Eopolydiexodina Wilde,1975	Eopolydiexodina praecursor Lloyd,1963	Kunlun-Qadam Block	7.72	1.63	equatorial areas	Y	Fusiform	18
Schwagerinidae Dunbar et Henbest,1930	Schwag	Eopolydiexodina Wilde,1975	Eopolydiexodina praecursor Lloyd,1963	Kunlun-Qadam Block	7.84	1.72	equatorial areas	Y	Fusiform	18
Schwagerinidae Dunbar et Henbest,1930	Schwag	Eopolydiexodina Wilde,1975	Eopolydiexodina praecursor Lloyd,1963	Kunlun-Qadam Block	12.4	2.08	equatorial areas	Y	Fusiform	18
Schwagerinidae Dunbar et Henbest,1930	Schwag	Eopolydiexodina Wilde,1975	Eopolydiexodina afghanensis (Thompson,1946)	Kunlun-Qadam Block	9.68	3.92	equatorial areas	Y	Fusiform	18
Schwagerinidae Dunbar et Henbest,1930	Schwag	Parafusulina Dunbar et Skinner,1931	Parafusulina multiseptata (Schellwien,1898)	Kunlun-Qadam Block	12.94	4.68	equatorial areas	Y	Fusiform	18
Verbeekinidae Staff et Wedekina,1910	Verb	Pseudodoliolina Yabe et Hanzawa,1932	Pseudodoliolina tobensis Zhang, 1982	Kunlun-Qadam Block	4.37	1.43	equatorial areas	Y	Fusiform	18
Verbeekinidae Staff et Wedekina,1910	Verb	Pseudodoliolina Yabe et Hanzawa,1932	Pseudodoliolina tobensis Zhang, 1982	Kunlun-Qadam Block	5.25	1.46	equatorial areas	Y	Fusiform	18
Verbeekinidae Staff et Wedekina,1910	Verb	Pseudodoliolina Yabe et Hanzawa,1932	Pseudodoliolina tobensis Zhang, 1982	Kunlun-Qadam Block	5.14	1.53	equatorial areas	Y	Fusiform	18
Verbeekinidae Staff et Wedekina,1910	Verb	Pseudodoliolina Yabe et Hanzawa,1932	Pseudodoliolina tobensis Zhang, 1982	Kunlun-Qadam Block	6.14	1.81	equatorial areas	Y	Fusiform	18
Schubertellidae Skinner,1931	Schu	Yangchienia Lee,1933	Yangchienia iniqua Lee,1933	Kunlun-Qadam Block	2.12	1.54	equatorial areas	N	Fusiform	18
Neoschwagerinidae Dunbar et Condra,1927	Neo	Afghanella Thompson,1946	Afghanella schencki Thompson, 1946	South China	3.165	1.935	equatorial areas	Y	Fusiform	35	[35]
Neoschwagerinidae Dunbar et Condra,1927	Neo	Cancellina Hayden,1909 emend Kanmera,1957	Cancellina intermedia Yang	South China	3.033	1.693	equatorial areas	Y	Fusiform	35
Neoschwagerinidae Dunbar et Condra,1927	Neo	Cancellina Hayden,1909 emend Kanmera,1957	Cancellina nipponica (Ozawa, 1927)	South China	2.365	1.775	equatorial areas	Y	Fusiform	35
Schwagerinidae Dunbar et Henbest,1930	Schwag	Chusenella Hsu,1942	Chusenella tieni (Chen,1956)	South China	5.16	2.07	equatorial areas	Y	Fusiform	35
Schwagerinidae Dunbar et Henbest,1930	Schwag	Chusenella Hsu,1942	Chusenella sinensis Sheng,1963	South China	6.42	2.99	equatorial areas	Y	Fusiform	35
Schwagerinidae Dunbar et Henbest,1930	Schwag	Chusenella Hsu,1942	Chusenella ishanensis Hsu,1942	South China	8.89	4.3	equatorial areas	Y	Fusiform	35
Neoschwagerinidae Dunbar et Condra,1927	Neo	Lepidolina Lee,1933	Lepidolina multiseptata (Deprat,1912)	South China	5.84	2.793	equatorial areas	Y	Fusiform	35
Neoschwagerinidae Dunbar et Condra,1927	Neo	Maklaya Kanmera et Toriyama,1968	Maklaya pamirica Leven,1967	South China	4.81	4.13	equatorial areas	Y	Fusiform	35
Verbeekinidae Staff et Wedekina,1910	Verb	Metadoliolina Ishii et Nogami,1961	Metadoliolina pulchra (Sheng,1963)	South China	4.307	3.373	equatorial areas	Y	Fusiform	35
Schubertellidae Skinner,1931	Schu	Neofusulinella Deprat,1912	Neofusulinella giraudi Deprat,1915	South China	3.35	1.85	equatorial areas	N	Fusiform	35
Neoschwagerinidae Dunbar et Condra,1927	Neo	Neoschwagerina Yabe,1903	Neoschwagerina colaniae Ozawa,1927	South China	2.325	1.525	equatorial areas	Y	Fusiform	35
Neoschwagerinidae Dunbar et Condra,1927	Neo	Neoschwagerina Yabe,1903	Neoschwagerina craticulifera (Schwager, 1883)	South China	2.95	2.058	equatorial areas	Y	Fusiform	35
Neoschwagerinidae Dunbar et Condra,1927	Neo	Neoschwagerina Yabe,1903	Neoschwagerina simplex Ozawa,1927	South China	3.233	2.192	equatorial areas	Y	Fusiform	35
Neoschwagerinidae Dunbar et Condra,1927	Neo	Neoschwagerina Yabe,1903	Neoschwagerina megasphaerica Deprat, 1913	South China	5.333	2.767	equatorial areas	Y	Fusiform	35
Neoschwagerinidae Dunbar et Condra,1927	Neo	Neoschwagerina Yabe,1903	Neoschwagerina hsinghaiana Sheng, 1958	South China	5.573	3.053	equatorial areas	Y	Fusiform	35
Neoschwagerinidae Dunbar et Condra,1927	Neo	Neoschwagerina Yabe,1903	Neoschwagerina cheni Sheng,1958	South China	3.927	3.28	equatorial areas	Y	Fusiform	35
Neoschwagerinidae Dunbar et Condra,1927	Neo	Neoschwagerina Yabe,1903	Neoschwagerina craticulifera (Schwager, 1883)	South China	5.192	3.333	equatorial areas	Y	Fusiform	35
Neoschwagerinidae Dunbar et Condra,1927	Neo	Presumatrina Toumanskaya,1950	Presumatrina schellwieni (Deprat,1913)	South China	3.267	2.133	equatorial areas	Y	Fusiform	35
Neoschwagerinidae Dunbar et Condra,1927	Neo	Presumatrina Toumanskaya,1950	Presumatrina schellwieni (Deprat,1913)	South China	4.74	2.67	equatorial areas	Y	Fusiform	35
Neoschwagerinidae Dunbar et Condra,1927	Neo	Presumatrina Toumanskaya,1950	Presumatrina schellwieni (Deprat,1913)	South China	5.125	3.542	equatorial areas	Y	Fusiform	35
Schwagerinidae Dunbar et Henbest,1930	Schwag	Pseudofusulina Dunbar et Skinner,1931	Pseudofusulina margheritii (Deprat,1912)	South China	5.74	2.09	equatorial areas	Y	Fusiform	35
Neoschwagerinidae Dunbar et Condra,1927	Neo	Sumatrina Volz,1904	Sumatrina longissima Deprat,1914	South China	10.94	1.99	equatorial areas	Y	Fusiform	35
Verbeekinidae Staff et Wedekina,1910	Verb	Verbeekina Staff,1909	Verbeekina verbeeki (Geinitz,1876)	South China	2.625	2.94	equatorial areas	Y	Fusiform	35
Neoschwagerinidae Dunbar et Condra,1927	Neo	Yabeina Deprat,1914	Yabeina gubleri Kanmera,1954	South China	5.187	2.393	equatorial areas	Y	Fusiform	35
Staffellidae A.D.Miklukho-Maklay, 1949	Staff	Nankinella Lee,1933	Nankinella hunanensis (Chen,1956)	Baoshan Block	1.987	3.707	south transitional zone	N	Lenticular	4	[36]
Schubertellidae Skinner,1931	Schu	Neofusulinella Deprat,1912	Neofusulinella lantenoisi Deprat,1912	Baoshan Block	3.67	2.65	south transitional zone	N	Fusiform	4
Schubertellidae Skinner,1931	Schu	Neofusulinella Deprat,1912	Neofusulinella lantenoisi Deprat,1912	Baoshan Block	5.17	3.67	south transitional zone	N	Fusiform	4
Schubertellidae Skinner,1931	Schu	Neofusulinella Deprat,1912	Neofusulinella lantenoisi Deprat,1912	Baoshan Block	5.85	4.22	south transitional zone	N	Fusiform	4
Staffellidae A.D.Miklukho-Maklay, 1949	Staff	Staffella Ozawa,1925	Staffella sphaerica (Abich, 1858)	Baoshan Block	1.72	1.88	south transitional zone	N	Lenticular	4
Neoschwagerinidae Dunbar et Condra,1927	Neo	Afghanella Thompson,1946	Afghanella schencki Thompson, 1946	South China	7.55	4.113	equatorial areas	Y	Fusiform	35	[37]
Schwagerinidae Dunbar et Henbest,1930	Schwag	Chusenella Hsu,1942	Chusenella longa Rosovskaya, 1965	South China	9.25	2.688	equatorial areas	Y	Fusiform	35
Schwagerinidae Dunbar et Henbest,1930	Schwag	Chusenella Hsu,1942	Chusenella paraconicocylindrica Yang,1978	South China	9.075	2.85	equatorial areas	Y	Fusiform	35
Schwagerinidae Dunbar et Henbest,1930	Schwag	Chusenella Hsu,1942	Chusenella solita (Skinner,1969)	South China	11.025	3.1	equatorial areas	Y	Fusiform	35
Schwagerinidae Dunbar et Henbest,1930	Schwag	Chusenella Hsu,1942	Chusenella extensa Skinner,1969	South China	11.55	3.175	equatorial areas	Y	Fusiform	35
Schwagerinidae Dunbar et Henbest,1930	Schwag	Chusenella Hsu,1942	Chusenella solita (Skinner,1969)	South China	10.613	3.413	equatorial areas	Y	Fusiform	35
Schwagerinidae Dunbar et Henbest,1930	Schwag	Chusenella Hsu,1942	Chusenella ishanensis Hsu,1942	South China	11.1	4.113	equatorial areas	Y	Fusiform	35
Schubertellidae Skinner,1931	Schu	Codonofusiella Dunbar et Skinner,1937	Codonofusiella schubertelloides Sheng,1956	South China	0.68	0.355	equatorial areas	N	Fusiform	35
Schubertellidae Skinner,1931	Schu	Codonofusiella Dunbar et Skinner,1937	Codonofusiella paradoxica Dunbar et Skinner,1937	South China	0.988	0.44	equatorial areas	N	Fusiform	35
Schubertellidae Skinner,1931	Schu	Codonofusiella Dunbar et Skinner,1937	Codonofusiella kueichowensis Sheng	South China	1.353	0.453	equatorial areas	N	Fusiform	35
Neoschwagerinidae Dunbar et Condra,1927	Neo	Colania Lee,1933	Colania douvillei (Ozawa, 1925)	South China	5.48	3.42	equatorial areas	Y	Fusiform	35
Neoschwagerinidae Dunbar et Condra,1927	Neo	Colania Lee,1933	Colania douvillei (Ozawa, 1925)	South China	7.325	4.375	equatorial areas	Y	Fusiform	35
Schubertellidae Skinner,1931	Schu	Lantschichites Toumanskaya,1953	Lantschichites minima (Chen,1956)	South China	2.497	0.44	equatorial areas	N	Fusiform	35
Schubertellidae Skinner,1931	Schu	Lantschichites Toumanskaya,1953	Lantschichites minima (Chen,1956)	South China	1.865	0.451	equatorial areas	N	Fusiform	35
Schubertellidae Skinner,1931	Schu	Lantschichites Toumanskaya,1953	Lantschichites minima (Chen,1956)	South China	1.816	0.516	equatorial areas	N	Fusiform	35
Schubertellidae Skinner,1931	Schu	Lantschichites Toumanskaya,1953	Lantschichites minima (Chen,1956)	South China	2.64	0.611	equatorial areas	N	Fusiform	35
Neoschwagerinidae Dunbar et Condra,1927	Neo	Neoschwagerina Yabe,1903	Neoschwagerina kueichowensis Sheng,1963	South China	6.188	3.088	equatorial areas	Y	Fusiform	35
Neoschwagerinidae Dunbar et Condra,1927	Neo	Neoschwagerina Yabe,1903	Neoschwagerina kueichowensis Sheng,1963	South China	6.188	3.363	equatorial areas	Y	Fusiform	35
Neoschwagerinidae Dunbar et Condra,1927	Neo	Neoschwagerina Yabe,1903	Neoschwagerina craticulifera (Schwager, 1883)	South China	5.225	3.538	equatorial areas	Y	Fusiform	35
Neoschwagerinidae Dunbar et Condra,1927	Neo	Neoschwagerina Yabe,1903	Neoschwagerina brevis Thompson,Wheeler et Dunbar,1950	South China	5.5	3.738	equatorial areas	Y	Fusiform	35
Neoschwagerinidae Dunbar et Condra,1927	Neo	Neoschwagerina Yabe,1903	Neoschwagerina craticulifera (Schwager, 1883)	South China	5.43	4.07	equatorial areas	Y	Fusiform	35
Neoschwagerinidae Dunbar et Condra,1927	Neo	Neoschwagerina Yabe,1903	Neoschwagerina brevis Thompson,Wheeler et Dunbar,1950	South China	5.875	4.213	equatorial areas	Y	Fusiform	35
Neoschwagerinidae Dunbar et Condra,1927	Neo	Neoschwagerina Yabe,1903	Neoschwagerina kueichowensis Sheng,1963	South China	7.38	4.44	equatorial areas	Y	Fusiform	35
Schwagerinidae Dunbar et Henbest,1930	Schwag	Parafusulina Dunbar et Skinner,1931	Parafusulina quasilinearis Chang, 1964	South China	9.288	1.525	equatorial areas	Y	Fusiform	35
Schwagerinidae Dunbar et Henbest,1930	Schwag	Parafusulina Dunbar et Skinner,1931	Parafusulina guatemalaensis Dunbar, 1939	South China	9.975	2.238	equatorial areas	Y	Fusiform	35
Schwagerinidae Dunbar et Henbest,1930	Schwag	Parafusulina Dunbar et Skinner,1931	Parafusulina hexigtenensis Han,1980	South China	10.6	2.25	equatorial areas	Y	Fusiform	35
Schwagerinidae Dunbar et Henbest,1930	Schwag	Parafusulina Dunbar et Skinner,1931	Parafusulina nosonensis Thompson and Wheeler, 1946	South China	14.338	2.325	equatorial areas	Y	Fusiform	35
Schwagerinidae Dunbar et Henbest,1930	Schwag	Parafusulina Dunbar et Skinner,1931	Parafusulina virga Thompson et Wheeler, 1946	South China	12.625	2.45	equatorial areas	Y	Fusiform	35
Schwagerinidae Dunbar et Henbest,1930	Schwag	Parafusulina Dunbar et Skinner,1931	Parafusulina nosonensis Thompson and Wheeler, 1946	South China	13.738	2.45	equatorial areas	Y	Fusiform	35
Schwagerinidae Dunbar et Henbest,1930	Schwag	Parafusulina Dunbar et Skinner,1931	Parafusulina nosonensis Thompson and Wheeler, 1946	South China	14.05	2.5	equatorial areas	Y	Fusiform	35
Schwagerinidae Dunbar et Henbest,1930	Schwag	Parafusulina Dunbar et Skinner,1931	Parafusulina shaksgamensis Reichel,1940	South China	12.188	3.213	equatorial areas	Y	Fusiform	35
Verbeekinidae Staff et Wedekina,1910	Verb	Pseudokahlerina Sosnina, 1968	Pseudokahlerina simplex (Lin,1977)	South China	0.504	1.72	equatorial areas	Y	Fusiform	35
Ozawainellidae Thompson et Foster,1937	Oza	Rauserella Dunbar,1944	Rauserella staffi Skinner and Wilde, 1966	South China	1.42	0.528	equatorial areas	N	Lenticular	35
Ozawainellidae Thompson et Foster,1937	Oza	Reichelina Erk,1941	Reichelina simplex Sheng	South China	0.188	0.435	equatorial areas	N	Lenticular	35
Schwagerinidae Dunbar et Henbest,1930	Schwag	Chusenella Hsu,1942	Chusenella chihsiaensis (Lee,1931)	Sibumasu Block	7.313	2.113	south transitional zone	Y	Fusiform	31	[38]
Schwagerinidae Dunbar et Henbest,1930	Schwag	Chusenella Hsu,1942	Chusenella tumefacta Chedija, 1989	Sibumasu Block	7.125	4.625	south transitional zone	Y	Fusiform	31
Schwagerinidae Dunbar et Henbest,1930	Schwag	Chusenella Hsu,1942	Chusenella tumefacta Chedija, 1989	Sibumasu Block	8.313	5.125	south transitional zone	Y	Fusiform	31
Schwagerinidae Dunbar et Henbest,1930	Schwag	Eopolydiexodina Wilde,1975	Eopolydiexodina afghanensis (Thompson,1946)	Baoshan Block	15.013	3.05	south transitional zone	Y	Fusiform	4
Schwagerinidae Dunbar et Henbest,1930	Schwag	Eopolydiexodina Wilde,1975	Eopolydiexodina afghanensis (Thompson,1946)	Sibumasu Block	18.15	3.113	south transitional zone	Y	Fusiform	31
Schwagerinidae Dunbar et Henbest,1930	Schwag	Eopolydiexodina Wilde,1975	Eopolydiexodina afghanensis (Thompson,1946)	Sibumasu Block	13.663	3.588	south transitional zone	Y	Fusiform	31
Schwagerinidae Dunbar et Henbest,1930	Schwag	Eopolydiexodina Wilde,1975	Eopolydiexodina afghanensis (Thompson,1946)	Sibumasu Block	21.557	3.686	south transitional zone	Y	Fusiform	31
Staffellidae A.D.Miklukho-Maklay, 1949	Staff	Jinzhangia Ueno, 2001	Jinzhangia shengi Ueno, 2001	Baoshan Block	4.95	3.5	south transitional zone	N	Lenticular	4
Schwagerinidae Dunbar et Henbest,1930	Schwag	Rugososchwagerina M.-Maclay,1956	Rugososchwagerina xizangica Wang,Sheng et Zhang,1981	Baoshan Block	6.725	5.975	south transitional zone	Y	Fusiform	4
Schwagerinidae Dunbar et Henbest,1930	Schwag	Rugososchwagerina M.-Maclay,1956	Rugososchwagerina xizangica Wang,Sheng et Zhang,1981	Sibumasu Block	6.8	7.35	south transitional zone	Y	Fusiform	31
Schubertellidae Skinner,1931	Schu	Yangchienia Lee,1933	Yangchienia haydeni Thompson,1946	Sibumasu Block	1.755	1.215	south transitional zone	N	Fusiform	31
Neoschwagerinidae Dunbar et Condra,1927	Neo	Colania Lee,1933	Colania ngariensis Nie et Song,1983	Kitakami Terrane	5.475	5.675	north transitional zone	Y	Fusiform	17	[39]
Neoschwagerinidae Dunbar et Condra,1927	Neo	Lepidolina Lee,1933	Lepidolina multiseptata (Deprat,1912)	Kitakami Terrane	6.9	4.763	north transitional zone	Y	Fusiform	17
Schwagerinidae Dunbar et Henbest,1930	Schwag	Monodiexodina Sosnina,1956	Monodiexodina sutchanica (Dutkevich in Likharev, 1939)	Kitakami Terrane	19.345	2.2	north transitional zone	Y	Fusiform	17
Schwagerinidae Dunbar et Henbest,1930	Schwag	Monodiexodina Sosnina,1956	Monodiexodina sutchanica (Dutkevich in Likharev, 1939)	Kitakami Terrane	18.727	2.345	north transitional zone	Y	Fusiform	17
Schwagerinidae Dunbar et Henbest,1930	Schwag	Monodiexodina Sosnina,1956	Monodiexodina sutchanica (Dutkevich in Likharev, 1939)	Kitakami Terrane	19.345	2.455	north transitional zone	Y	Fusiform	17
Schwagerinidae Dunbar et Henbest,1930	Schwag	Parafusulina Dunbar et Skinner,1931	Parafusulina motoyoshiensis (Morikawa,1960)	Kitakami Terrane	5.5	1.5	north transitional zone	Y	Fusiform	17
Verbeekinidae Staff et Wedekina,1910	Verb	Verbeekina Staff,1909	Verbeekina verbeeki (Geinitz,1876)	Kitakami Terrane	7.288	7.213	north transitional zone	Y	Fusiform	17
Neoschwagerinidae Dunbar et Condra,1927	Neo	Afghanella Thompson,1946	Afghanella gongxianensis Yang,1978	South China	5.6	1.71	equatorial areas	Y	Fusiform	35	[40]
Neoschwagerinidae Dunbar et Condra,1927	Neo	Afghanella Thompson,1946	Afghanella schencki Thompson, 1946	South China	3.62	2.08	equatorial areas	Y	Fusiform	35
Neoschwagerinidae Dunbar et Condra,1927	Neo	Afghanella Thompson,1946	Afghanella pulchella Zhang et Dong,1986	South China	5.31	2.08	equatorial areas	Y	Fusiform	35
Neoschwagerinidae Dunbar et Condra,1927	Neo	Afghanella Thompson,1946	Afghanella schencki Thompson, 1946	South China	3.42	2.14	equatorial areas	Y	Fusiform	35
Neoschwagerinidae Dunbar et Condra,1927	Neo	Afghanella Thompson,1946	Afghanella schencki Thompson, 1946	South China	4.25	2.14	equatorial areas	Y	Fusiform	35
Neoschwagerinidae Dunbar et Condra,1927	Neo	Afghanella Thompson,1946	Afghanella pulchella Zhang et Dong,1986	South China	5.76	2.18	equatorial areas	Y	Fusiform	35
Neoschwagerinidae Dunbar et Condra,1927	Neo	Afghanella Thompson,1946	Afghanella megaspherica Sheng,1958	South China	4.1	2.25	equatorial areas	Y	Fusiform	35
Neoschwagerinidae Dunbar et Condra,1927	Neo	Afghanella Thompson,1946	Afghanella schencki Thompson, 1946	South China	3.87	2.33	equatorial areas	Y	Fusiform	35
Neoschwagerinidae Dunbar et Condra,1927	Neo	Afghanella Thompson,1946	Afghanella pulchella Zhang et Dong,1986	South China	6.62	2.4	equatorial areas	Y	Fusiform	35
Neoschwagerinidae Dunbar et Condra,1927	Neo	Afghanella Thompson,1946	Afghanella intermedia Zhang et Dong,1986	South China	6.7	2.4	equatorial areas	Y	Fusiform	35
Neoschwagerinidae Dunbar et Condra,1927	Neo	Afghanella Thompson,1946	Afghanella pulchella Zhang et Dong,1986	South China	6.5	2.46	equatorial areas	Y	Fusiform	35
Neoschwagerinidae Dunbar et Condra,1927	Neo	Afghanella Thompson,1946	Afghanella megaspherica Sheng,1958	South China	3.9	2.51	equatorial areas	Y	Fusiform	35
Neoschwagerinidae Dunbar et Condra,1927	Neo	Afghanella Thompson,1946	Afghanella megaspherica Sheng,1958	South China	3.94	2.67	equatorial areas	Y	Fusiform	35
Neoschwagerinidae Dunbar et Condra,1927	Neo	Afghanella Thompson,1946	Afghanella megaspherica Sheng,1958	South China	3.92	2.84	equatorial areas	Y	Fusiform	35
Neoschwagerinidae Dunbar et Condra,1927	Neo	Afghanella Thompson,1946	Afghanella sumatrinaeformis (Gubler, 1935)	South China	5.4	2.85	equatorial areas	Y	Fusiform	35
Neoschwagerinidae Dunbar et Condra,1927	Neo	Afghanella Thompson,1946	Afghanella gongxianensis Yang,1978	South China	5.34	2.98	equatorial areas	Y	Fusiform	35
Neoschwagerinidae Dunbar et Condra,1927	Neo	Afghanella Thompson,1946	Afghanella intermedia Zhang et Dong,1986	South China	6.84	3.02	equatorial areas	Y	Fusiform	35
Neoschwagerinidae Dunbar et Condra,1927	Neo	Afghanella Thompson,1946	Afghanella gongxianensis Yang,1978	South China	6.46	3.09	equatorial areas	Y	Fusiform	35
Neoschwagerinidae Dunbar et Condra,1927	Neo	Afghanella Thompson,1946	Afghanella gongxianensis Yang,1978	South China	5.8	3.14	equatorial areas	Y	Fusiform	35
Neoschwagerinidae Dunbar et Condra,1927	Neo	Afghanella Thompson,1946	Afghanella gongxianensis Yang,1978	South China	6.37	3.24	equatorial areas	Y	Fusiform	35
Neoschwagerinidae Dunbar et Condra,1927	Neo	Afghanella Thompson,1946	Afghanella sumatrinaeformis (Gubler, 1935)	South China	6.24	3.38	equatorial areas	Y	Fusiform	35
Neoschwagerinidae Dunbar et Condra,1927	Neo	Afghanella Thompson,1946	Afghanella sumatrinaeformis (Gubler, 1935)	South China	5.2	3.5	equatorial areas	Y	Fusiform	35
Neoschwagerinidae Dunbar et Condra,1927	Neo	Afghanella Thompson,1946	Afghanella sumatrinaeformis (Gubler, 1935)	South China	5.31	3.5	equatorial areas	Y	Fusiform	35
Neoschwagerinidae Dunbar et Condra,1927	Neo	Afghanella Thompson,1946	Afghanella sumatrinaeformis (Gubler, 1935)	South China	5.41	3.67	equatorial areas	Y	Fusiform	35
Verbeekinidae Staff et Wedekina,1910	Verb	Armenina M.-Maclay,1955	Armenina crassispira (Chen,1956)	South China	5.08	5.05	equatorial areas	Y	Fusiform	35
Neoschwagerinidae Dunbar et Condra,1927	Neo	Cancellina Hayden,1909 emend Kanmera,1957	Cancellina liuzhiensis Yang,1985	South China	2.16	1.06	equatorial areas	Y	Fusiform	35
Neoschwagerinidae Dunbar et Condra,1927	Neo	Cancellina Hayden,1909 emend Kanmera,1957	Cancellina liuzhiensis Yang,1985	South China	2.11	1.08	equatorial areas	Y	Fusiform	35
Neoschwagerinidae Dunbar et Condra,1927	Neo	Cancellina Hayden,1909 emend Kanmera,1957	Cancellina liuzhiensis Yang,1985	South China	2.67	1.36	equatorial areas	Y	Fusiform	35
Neoschwagerinidae Dunbar et Condra,1927	Neo	Cancellina Hayden,1909 emend Kanmera,1957	Cancellina liuzhiensis Yang,1985	South China	3.21	1.95	equatorial areas	Y	Fusiform	35
Schwagerinidae Dunbar et Henbest,1930	Schwag	Chusenella Hsu,1942	Chusenella tingi Chen,1956	South China	2.97	1	equatorial areas	Y	Fusiform	35
Schwagerinidae Dunbar et Henbest,1930	Schwag	Chusenella Hsu,1942	Chusenella tieni (Chen,1956)	South China	3.74	1.21	equatorial areas	Y	Fusiform	35
Schwagerinidae Dunbar et Henbest,1930	Schwag	Chusenella Hsu,1942	Chusenella wuhsuehensis (Chen,1956)	South China	2.94	1.26	equatorial areas	Y	Fusiform	35
Schwagerinidae Dunbar et Henbest,1930	Schwag	Chusenella Hsu,1942	Chusenella sinensis Sheng,1963	South China	4.9	1.48	equatorial areas	Y	Fusiform	35
Schwagerinidae Dunbar et Henbest,1930	Schwag	Chusenella Hsu,1942	Chusenella sinensis Sheng,1963	South China	5	1.6	equatorial areas	Y	Fusiform	35
Schwagerinidae Dunbar et Henbest,1930	Schwag	Chusenella Hsu,1942	Chusenella deprati (Ozawa,1925)	South China	4.14	1.61	equatorial areas	Y	Fusiform	35
Schwagerinidae Dunbar et Henbest,1930	Schwag	Chusenella Hsu,1942	Chusenella deprati (Ozawa,1925)	South China	4.17	1.65	equatorial areas	Y	Fusiform	35
Schwagerinidae Dunbar et Henbest,1930	Schwag	Chusenella Hsu,1942	Chusenella sinensis Sheng,1963	South China	4.95	1.65	equatorial areas	Y	Fusiform	35
Schwagerinidae Dunbar et Henbest,1930	Schwag	Chusenella Hsu,1942	Chusenella deprati (Ozawa,1925)	South China	3.94	1.79	equatorial areas	Y	Fusiform	35
Schwagerinidae Dunbar et Henbest,1930	Schwag	Chusenella Hsu,1942	Chusenella conicocylindrica Chen,1956	South China	5	1.79	equatorial areas	Y	Fusiform	35
Schwagerinidae Dunbar et Henbest,1930	Schwag	Chusenella Hsu,1942	Chusenella tingi Chen,1956	South China	4	1.87	equatorial areas	Y	Fusiform	35
Schwagerinidae Dunbar et Henbest,1930	Schwag	Chusenella Hsu,1942	Chusenella sinensis Sheng,1963	South China	5.5	1.87	equatorial areas	Y	Fusiform	35
Schwagerinidae Dunbar et Henbest,1930	Schwag	Chusenella Hsu,1942	Chusenella tingi Chen,1956	South China	5	2.08	equatorial areas	Y	Fusiform	35
Schwagerinidae Dunbar et Henbest,1930	Schwag	Chusenella Hsu,1942	Chusenella conicocylindrica Chen,1956	South China	5.7	2.21	equatorial areas	Y	Fusiform	35
Schwagerinidae Dunbar et Henbest,1930	Schwag	Chusenella Hsu,1942	Chusenella conicocylindrica Chen,1956	South China	6.18	2.28	equatorial areas	Y	Fusiform	35
Schwagerinidae Dunbar et Henbest,1930	Schwag	Chusenella Hsu,1942	Chusenella schwagerinaeformis Sheng,1963	South China	4.94	2.31	equatorial areas	Y	Fusiform	35
Schwagerinidae Dunbar et Henbest,1930	Schwag	Chusenella Hsu,1942	Chusenella chihsiaensis (Lee,1931)	South China	8.08	2.31	equatorial areas	Y	Fusiform	35
Schwagerinidae Dunbar et Henbest,1930	Schwag	Chusenella Hsu,1942	Chusenella wuhsuehensis (Chen,1956)	South China	3.74	2.41	equatorial areas	Y	Fusiform	35
Schwagerinidae Dunbar et Henbest,1930	Schwag	Chusenella Hsu,1942	Chusenella sinensis Sheng,1963	South China	5.54	2.41	equatorial areas	Y	Fusiform	35
Schwagerinidae Dunbar et Henbest,1930	Schwag	Chusenella Hsu,1942	Chusenella sinensis Sheng,1963	South China	5.4	2.45	equatorial areas	Y	Fusiform	35
Schwagerinidae Dunbar et Henbest,1930	Schwag	Chusenella Hsu,1942	Chusenella schwagerinaeformis Sheng,1963	South China	5.41	2.48	equatorial areas	Y	Fusiform	35
Schwagerinidae Dunbar et Henbest,1930	Schwag	Chusenella Hsu,1942	Chusenella chihsiaensis (Lee,1931)	South China	8.18	2.6	equatorial areas	Y	Fusiform	35
Schwagerinidae Dunbar et Henbest,1930	Schwag	Chusenella Hsu,1942	Chusenella brevibola (Chen,1956)	South China	5.7	2.64	equatorial areas	Y	Fusiform	35
Schwagerinidae Dunbar et Henbest,1930	Schwag	Chusenella Hsu,1942	Chusenella sinensis Sheng,1963	South China	6.27	2.67	equatorial areas	Y	Fusiform	35
Schwagerinidae Dunbar et Henbest,1930	Schwag	Chusenella Hsu,1942	Chusenella sinensis Sheng,1963	South China	6.23	2.69	equatorial areas	Y	Fusiform	35
Schwagerinidae Dunbar et Henbest,1930	Schwag	Chusenella Hsu,1942	Chusenella schwagerinaeformis Sheng,1963	South China	6.3	2.7	equatorial areas	Y	Fusiform	35
Schubertellidae Skinner,1931	Schu	Codonofusiella Dunbar et Skinner,1937	Codonofusiella tenuissima Sheng	South China	0.713	0.25	equatorial areas	N	Fusiform	35
Schubertellidae Skinner,1931	Schu	Codonofusiella Dunbar et Skinner,1937	Codonofusiella schubertelloides Sheng,1956	South China	0.63	0.39	equatorial areas	N	Fusiform	35
Neoschwagerinidae Dunbar et Condra,1927	Neo	Colania Lee,1933	Colania douvillei (Ozawa, 1925)	South China	5.84	3.84	equatorial areas	Y	Fusiform	35
Neoschwagerinidae Dunbar et Condra,1927	Neo	Colania Lee,1933	Colania douvillei (Ozawa, 1925)	South China	6.4	4.09	equatorial areas	Y	Fusiform	35
Neoschwagerinidae Dunbar et Condra,1927	Neo	Gifuella Honjo,1959	Gifuella gifuensis Honjo,1959	South China	8	3.62	equatorial areas	Y	Fusiform	35
Verbeekinidae Staff et Wedekina,1910	Verb	Kahlerina Kochansky-Devidie et Ramovs,1955	Kahlerina minima Sheng,1963	South China	1.06	1.2	equatorial areas	Y	Fusiform	35
Verbeekinidae Staff et Wedekina,1910	Verb	Kahlerina Kochansky-Devidie et Ramovs,1955	Kahlerina ussurica (Sosnina,1956)	South China	1.65	2.16	equatorial areas	Y	Fusiform	35
Schubertellidae Skinner,1931	Schu	Lantschichites Toumanskaya,1953	Lantschichites minima (Chen,1956)	South China	2.77	0.58	equatorial areas	N	Fusiform	35
Neoschwagerinidae Dunbar et Condra,1927	Neo	Lepidolina Lee,1933	Lepidolina multiseptata (Deprat,1912)	South China	5.33	4.43	equatorial areas	Y	Fusiform	35
Neoschwagerinidae Dunbar et Condra,1927	Neo	Lepidolina Lee,1933	Lepidolina shiraiwensis (Ozawa, 1925)	South China	7.7	4.64	equatorial areas	Y	Fusiform	35
Verbeekinidae Staff et Wedekina,1910	Verb	Metadoliolina Ishii et Nogami,1961	Metadoliolina pulchra (Sheng,1963)	South China	5.3	2.38	equatorial areas	Y	Fusiform	35
Verbeekinidae Staff et Wedekina,1910	Verb	Metadoliolina Ishii et Nogami,1961	Metadoliolina pulchra (Sheng,1963)	South China	4.07	2.57	equatorial areas	Y	Fusiform	35
Verbeekinidae Staff et Wedekina,1910	Verb	Metadoliolina Ishii et Nogami,1961	Metadoliolina subquadrata (Zhang et Dong,1986)	South China	3.3	2.87	equatorial areas	Y	Fusiform	35
Verbeekinidae Staff et Wedekina,1910	Verb	Metadoliolina Ishii et Nogami,1961	Metadoliolina brevicylindrica (Liu,Dong et Xiao,1978)	South China	4.85	2.95	equatorial areas	Y	Fusiform	35
Verbeekinidae Staff et Wedekina,1910	Verb	Metadoliolina Ishii et Nogami,1961	Metadoliolina pulchra (Sheng,1963)	South China	4.2	3.09	equatorial areas	Y	Fusiform	35
Verbeekinidae Staff et Wedekina,1910	Verb	Metadoliolina Ishii et Nogami,1961	Metadoliolina dutkevitchi Sosnina, 1965	South China	8.85	3.17	equatorial areas	Y	Fusiform	35
Verbeekinidae Staff et Wedekina,1910	Verb	Metadoliolina Ishii et Nogami,1961	Metadoliolina pulchra (Sheng,1963)	South China	5.65	3.21	equatorial areas	Y	Fusiform	35
Verbeekinidae Staff et Wedekina,1910	Verb	Metadoliolina Ishii et Nogami,1961	Metadoliolina pulchra (Sheng,1963)	South China	4.38	3.22	equatorial areas	Y	Fusiform	35
Verbeekinidae Staff et Wedekina,1910	Verb	Metadoliolina Ishii et Nogami,1961	Metadoliolina pulchra (Sheng,1963)	South China	6.07	3.5	equatorial areas	Y	Fusiform	35
Verbeekinidae Staff et Wedekina,1910	Verb	Metadoliolina Ishii et Nogami,1961	Metadoliolina brevicylindrica (Liu,Dong et Xiao,1978)	South China	6.8	4.01	equatorial areas	Y	Fusiform	35
Verbeekinidae Staff et Wedekina,1910	Verb	Metadoliolina Ishii et Nogami,1961	Metadoliolina multivoluta (Sheng,1963)	South China	5.9	4.45	equatorial areas	Y	Fusiform	35
Verbeekinidae Staff et Wedekina,1910	Verb	Metadoliolina Ishii et Nogami,1961	Metadoliolina subquadrata (Zhang et Dong,1986)	South China	4.66	4.5	equatorial areas	Y	Fusiform	35
Verbeekinidae Staff et Wedekina,1910	Verb	Metadoliolina Ishii et Nogami,1961	Metadoliolina multivoluta (Sheng,1963)	South China	6.7	4.9	equatorial areas	Y	Fusiform	35
Verbeekinidae Staff et Wedekina,1910	Verb	Metadoliolina Ishii et Nogami,1961	Metadoliolina multivoluta (Sheng,1963)	South China	7.34	5.4	equatorial areas	Y	Fusiform	35
Verbeekinidae Staff et Wedekina,1910	Verb	Metadoliolina Ishii et Nogami,1961	Metadoliolina multivoluta (Sheng,1963)	South China	8.3	7.9	equatorial areas	Y	Fusiform	35
Staffellidae A.D.Miklukho-Maklay, 1949	Staff	Nankinella Lee,1933	Nankinella discoides (Lee,1931)	South China	2.04	2.51	equatorial areas	N	Lenticular	35
Staffellidae A.D.Miklukho-Maklay, 1949	Staff	Nankinella Lee,1933	Nankinella discoides (Lee,1931)	South China	2.13	2.75	equatorial areas	N	Lenticular	35
Neoschwagerinidae Dunbar et Condra,1927	Neo	Neoschwagerina Yabe,1903	Neoschwagerina confragaspira Leven, 1967	South China	2.9	1.18	equatorial areas	Y	Fusiform	35
Neoschwagerinidae Dunbar et Condra,1927	Neo	Neoschwagerina Yabe,1903	Neoschwagerina confragaspira Leven, 1967	South China	3.1	1.18	equatorial areas	Y	Fusiform	35
Neoschwagerinidae Dunbar et Condra,1927	Neo	Neoschwagerina Yabe,1903	Neoschwagerina confragaspira Leven, 1967	South China	3.8	1.23	equatorial areas	Y	Fusiform	35
Neoschwagerinidae Dunbar et Condra,1927	Neo	Neoschwagerina Yabe,1903	Neoschwagerina minima Dong,1981	South China	2.1	1.26	equatorial areas	Y	Fusiform	35
Neoschwagerinidae Dunbar et Condra,1927	Neo	Neoschwagerina Yabe,1903	Neoschwagerina minima Dong,1981	South China	1.97	1.29	equatorial areas	Y	Fusiform	35
Neoschwagerinidae Dunbar et Condra,1927	Neo	Neoschwagerina Yabe,1903	Neoschwagerina minima Dong,1981	South China	1.97	1.33	equatorial areas	Y	Fusiform	35
Neoschwagerinidae Dunbar et Condra,1927	Neo	Neoschwagerina Yabe,1903	Neoschwagerina minima Dong,1981	South China	2.34	1.51	equatorial areas	Y	Fusiform	35
Neoschwagerinidae Dunbar et Condra,1927	Neo	Neoschwagerina Yabe,1903	Neoschwagerina minima Dong,1981	South China	2.46	1.58	equatorial areas	Y	Fusiform	35
Neoschwagerinidae Dunbar et Condra,1927	Neo	Neoschwagerina Yabe,1903	Neoschwagerina kueichowensis Sheng,1963	South China	4.41	2.44	equatorial areas	Y	Fusiform	35
Neoschwagerinidae Dunbar et Condra,1927	Neo	Neoschwagerina Yabe,1903	Neoschwagerina simplex Ozawa,1927	South China	3.3	2.5	equatorial areas	Y	Fusiform	35
Neoschwagerinidae Dunbar et Condra,1927	Neo	Neoschwagerina Yabe,1903	Neoschwagerina simplex Ozawa,1927	South China	3.5	2.75	equatorial areas	Y	Fusiform	35
Neoschwagerinidae Dunbar et Condra,1927	Neo	Neoschwagerina Yabe,1903	Neoschwagerina craticulifera (Schwager, 1883)	South China	4.6	2.9	equatorial areas	Y	Fusiform	35
Neoschwagerinidae Dunbar et Condra,1927	Neo	Neoschwagerina Yabe,1903	Neoschwagerina craticulifera (Schwager, 1883)	South China	4.74	3	equatorial areas	Y	Fusiform	35
Neoschwagerinidae Dunbar et Condra,1927	Neo	Neoschwagerina Yabe,1903	Neoschwagerina cheni Sheng,1958	South China	4.17	3.04	equatorial areas	Y	Fusiform	35
Neoschwagerinidae Dunbar et Condra,1927	Neo	Neoschwagerina Yabe,1903	Neoschwagerina cheni Sheng,1958	South China	4.22	3.19	equatorial areas	Y	Fusiform	35
Neoschwagerinidae Dunbar et Condra,1927	Neo	Neoschwagerina Yabe,1903	Neoschwagerina kueichowensis Sheng,1963	South China	6.17	3.27	equatorial areas	Y	Fusiform	35
Neoschwagerinidae Dunbar et Condra,1927	Neo	Neoschwagerina Yabe,1903	Neoschwagerina simplex Ozawa,1927	South China	3.8	3.55	equatorial areas	Y	Fusiform	35
Neoschwagerinidae Dunbar et Condra,1927	Neo	Neoschwagerina Yabe,1903	Neoschwagerina hsinghaiana Sheng, 1958	South China	7.34	3.9	equatorial areas	Y	Fusiform	35
Neoschwagerinidae Dunbar et Condra,1927	Neo	Neoschwagerina Yabe,1903	Neoschwagerina houchangensis Zhang et Dong,1986	South China	3.67	4.1	equatorial areas	Y	Fusiform	35
Neoschwagerinidae Dunbar et Condra,1927	Neo	Neoschwagerina Yabe,1903	Neoschwagerina haydeni Dutkevich and Khabakov, 1934	South China	6.34	4.67	equatorial areas	Y	Fusiform	35
Neoschwagerinidae Dunbar et Condra,1927	Neo	Neoschwagerina Yabe,1903	Neoschwagerina haydeni Dutkevich and Khabakov, 1934	South China	6.7	4.94	equatorial areas	Y	Fusiform	35
Neoschwagerinidae Dunbar et Condra,1927	Neo	Neoschwagerina Yabe,1903	Neoschwagerina ellipsoidalis Zhang et Dong,1986	South China	5.68	5.14	equatorial areas	Y	Fusiform	35
Neoschwagerinidae Dunbar et Condra,1927	Neo	Neoschwagerina Yabe,1903	Neoschwagerina houchangensis Zhang et Dong,1986	South China	4.94	5.36	equatorial areas	Y	Fusiform	35
Schwagerinidae Dunbar et Henbest,1930	Schwag	Parafusulina Dunbar et Skinner,1931	Parafusulina elliptica Sheng,1963	South China	5.56	2.95	equatorial areas	Y	Fusiform	35
Schwagerinidae Dunbar et Henbest,1930	Schwag	Parafusulina Dunbar et Skinner,1931	Parafusulina yabei Hanzawa, 1942	South China	8.68	2.95	equatorial areas	Y	Fusiform	35
Schwagerinidae Dunbar et Henbest,1930	Schwag	Parafusulina Dunbar et Skinner,1931	Parafusulina elliptica Sheng,1963	South China	6.17	3.04	equatorial areas	Y	Fusiform	35
Schwagerinidae Dunbar et Henbest,1930	Schwag	Parafusulina Dunbar et Skinner,1931	Parafusulina elliptica Sheng,1963	South China	7.28	3.05	equatorial areas	Y	Fusiform	35
Schwagerinidae Dunbar et Henbest,1930	Schwag	Parafusulina Dunbar et Skinner,1931	Parafusulina elliptica Sheng,1963	South China	6.34	3.1	equatorial areas	Y	Fusiform	35
Schwagerinidae Dunbar et Henbest,1930	Schwag	Parafusulina Dunbar et Skinner,1931	Parafusulina maleyi Dunbar and Skinner, 1937	South China	10.5	3.12	equatorial areas	Y	Fusiform	35
Schwagerinidae Dunbar et Henbest,1930	Schwag	Parafusulina Dunbar et Skinner,1931	Parafusulina splendens Dunbar et Skinner,1937	South China	10.2	3.17	equatorial areas	Y	Fusiform	35
Schwagerinidae Dunbar et Henbest,1930	Schwag	Parafusulina Dunbar et Skinner,1931	Parafusulina gigantea (Deprat,1913)	South China	8.48	3.21	equatorial areas	Y	Fusiform	35
Schwagerinidae Dunbar et Henbest,1930	Schwag	Parafusulina Dunbar et Skinner,1931	Parafusulina yabei Hanzawa, 1942	South China	9.2	3.3	equatorial areas	Y	Fusiform	35
Schwagerinidae Dunbar et Henbest,1930	Schwag	Parafusulina Dunbar et Skinner,1931	Parafusulina chekiangensis Chen,1934	South China	9.59	3.34	equatorial areas	Y	Fusiform	35
Schwagerinidae Dunbar et Henbest,1930	Schwag	Parafusulina Dunbar et Skinner,1931	Parafusulina splendens Dunbar et Skinner,1937	South China	11.4	3.34	equatorial areas	Y	Fusiform	35
Schwagerinidae Dunbar et Henbest,1930	Schwag	Parafusulina Dunbar et Skinner,1931	Parafusulina yabei Hanzawa, 1942	South China	8.24	3.47	equatorial areas	Y	Fusiform	35
Schwagerinidae Dunbar et Henbest,1930	Schwag	Parafusulina Dunbar et Skinner,1931	Parafusulina yabei Hanzawa, 1942	South China	8.7	3.48	equatorial areas	Y	Fusiform	35
Schwagerinidae Dunbar et Henbest,1930	Schwag	Parafusulina Dunbar et Skinner,1931	Parafusulina splendens Dunbar et Skinner,1937	South China	10.65	3.77	equatorial areas	Y	Fusiform	35
Schwagerinidae Dunbar et Henbest,1930	Schwag	Parafusulina Dunbar et Skinner,1931	Parafusulina gigantea (Deprat,1913)	South China	9.35	3.9	equatorial areas	Y	Fusiform	35
Verbeekinidae Staff et Wedekina,1910	Verb	Paraverbeekina M.-Maclay,1955	Paraverbeekina pontica M.-Maclay,1955	South China	4.84	2.51	equatorial areas	Y	Fusiform	35
Verbeekinidae Staff et Wedekina,1910	Verb	Paraverbeekina M.-Maclay,1955	Paraverbeekina pontica M.-Maclay,1955	South China	3.6	2.54	equatorial areas	Y	Fusiform	35
Verbeekinidae Staff et Wedekina,1910	Verb	Paraverbeekina M.-Maclay,1955	Paraverbeekina pontica M.-Maclay,1955	South China	4.36	2.69	equatorial areas	Y	Fusiform	35
Verbeekinidae Staff et Wedekina,1910	Verb	Paraverbeekina M.-Maclay,1955	Paraverbeekina pontica M.-Maclay,1955	South China	5.41	3.73	equatorial areas	Y	Fusiform	35
Verbeekinidae Staff et Wedekina,1910	Verb	Paraverbeekina M.-Maclay,1955	Paraverbeekina umbilicata Sheng,1963	South China	5.62	3.94	equatorial areas	Y	Fusiform	35
Verbeekinidae Staff et Wedekina,1910	Verb	Paraverbeekina M.-Maclay,1955	Paraverbeekina akasakensis (Thompson,1936)	South China	5	4.05	equatorial areas	Y	Fusiform	35
Verbeekinidae Staff et Wedekina,1910	Verb	Paraverbeekina M.-Maclay,1955	Paraverbeekina pontica M.-Maclay,1955	South China	3.24	4.15	equatorial areas	Y	Fusiform	35
Verbeekinidae Staff et Wedekina,1910	Verb	Paraverbeekina M.-Maclay,1955	Paraverbeekina akasakensis (Thompson,1936)	South China	5	4.5	equatorial areas	Y	Fusiform	35
Verbeekinidae Staff et Wedekina,1910	Verb	Paraverbeekina M.-Maclay,1955	Paraverbeekina akasakensis (Thompson,1936)	South China	6	5.4	equatorial areas	Y	Fusiform	35
Verbeekinidae Staff et Wedekina,1910	Verb	Paraverbeekina M.-Maclay,1955	Paraverbeekina ellipsoidalis (Chen,1956)	South China	7.6	6.1	equatorial areas	Y	Fusiform	35
Neoschwagerinidae Dunbar et Condra,1927	Neo	Presumatrina Toumanskaya,1950	Presumatrina neoschwagerinoides (Deprat,1913)	South China	2.18	1.04	equatorial areas	Y	Fusiform	35
Neoschwagerinidae Dunbar et Condra,1927	Neo	Presumatrina Toumanskaya,1950	Presumatrina neoschwagerinoides (Deprat,1913)	South China	2.11	1.18	equatorial areas	Y	Fusiform	35
Neoschwagerinidae Dunbar et Condra,1927	Neo	Presumatrina Toumanskaya,1950	Presumatrina schellwieni (Deprat,1913)	South China	2.67	1.28	equatorial areas	Y	Fusiform	35
Neoschwagerinidae Dunbar et Condra,1927	Neo	Presumatrina Toumanskaya,1950	Presumatrina neoschwagerinoides (Deprat,1913)	South China	2.6	1.3	equatorial areas	Y	Fusiform	35
Neoschwagerinidae Dunbar et Condra,1927	Neo	Presumatrina Toumanskaya,1950	Presumatrina neoschwagerinoides (Deprat,1913)	South China	2.25	1.31	equatorial areas	Y	Fusiform	35
Neoschwagerinidae Dunbar et Condra,1927	Neo	Presumatrina Toumanskaya,1950	Presumatrina schellwieni (Deprat,1913)	South China	2.67	1.31	equatorial areas	Y	Fusiform	35
Neoschwagerinidae Dunbar et Condra,1927	Neo	Presumatrina Toumanskaya,1950	Presumatrina neoschwagerinoides (Deprat,1913)	South China	2.74	1.41	equatorial areas	Y	Fusiform	35
Neoschwagerinidae Dunbar et Condra,1927	Neo	Presumatrina Toumanskaya,1950	Presumatrina schellwieni (Deprat,1913)	South China	2.6	1.42	equatorial areas	Y	Fusiform	35
Neoschwagerinidae Dunbar et Condra,1927	Neo	Presumatrina Toumanskaya,1950	Presumatrina schellwieni (Deprat,1913)	South China	2.43	1.43	equatorial areas	Y	Fusiform	35
Neoschwagerinidae Dunbar et Condra,1927	Neo	Presumatrina Toumanskaya,1950	Presumatrina neoschwagerinoides (Deprat,1913)	South China	2.67	1.48	equatorial areas	Y	Fusiform	35
Neoschwagerinidae Dunbar et Condra,1927	Neo	Presumatrina Toumanskaya,1950	Presumatrina schellwieni (Deprat,1913)	South China	2.67	1.48	equatorial areas	Y	Fusiform	35
Neoschwagerinidae Dunbar et Condra,1927	Neo	Presumatrina Toumanskaya,1950	Presumatrina neoschwagerinoides (Deprat,1913)	South China	2.5	1.55	equatorial areas	Y	Fusiform	35
Neoschwagerinidae Dunbar et Condra,1927	Neo	Presumatrina Toumanskaya,1950	Presumatrina neoschwagerinoides (Deprat,1913)	South China	2.94	1.56	equatorial areas	Y	Fusiform	35
Neoschwagerinidae Dunbar et Condra,1927	Neo	Presumatrina Toumanskaya,1950	Presumatrina schellwieni (Deprat,1913)	South China	2.38	1.6	equatorial areas	Y	Fusiform	35
Neoschwagerinidae Dunbar et Condra,1927	Neo	Presumatrina Toumanskaya,1950	Presumatrina schellwieni (Deprat,1913)	South China	2.74	1.63	equatorial areas	Y	Fusiform	35
Neoschwagerinidae Dunbar et Condra,1927	Neo	Presumatrina Toumanskaya,1950	Presumatrina schellwieni (Deprat,1913)	South China	2.7	1.67	equatorial areas	Y	Fusiform	35
Neoschwagerinidae Dunbar et Condra,1927	Neo	Presumatrina Toumanskaya,1950	Presumatrina schellwieni (Deprat,1913)	South China	2.67	1.72	equatorial areas	Y	Fusiform	35
Neoschwagerinidae Dunbar et Condra,1927	Neo	Presumatrina Toumanskaya,1950	Presumatrina schellwieni (Deprat,1913)	South China	3.54	1.84	equatorial areas	Y	Fusiform	35
Verbeekinidae Staff et Wedekina,1910	Verb	Pseudodoliolina Yabe et Hanzawa,1932	Pseudodoliolina primigena Toriyama et Kanmera,1975	South China	3	0.85	equatorial areas	Y	Fusiform	35
Verbeekinidae Staff et Wedekina,1910	Verb	Pseudodoliolina Yabe et Hanzawa,1932	Pseudodoliolina saraburiensis Toriyama et Kanmera,1975	South China	2.01	0.87	equatorial areas	Y	Fusiform	35
Verbeekinidae Staff et Wedekina,1910	Verb	Pseudodoliolina Yabe et Hanzawa,1932	Pseudodoliolina primigena Toriyama et Kanmera,1975	South China	2.94	0.91	equatorial areas	Y	Fusiform	35
Verbeekinidae Staff et Wedekina,1910	Verb	Pseudodoliolina Yabe et Hanzawa,1932	Pseudodoliolina saraburiensis Toriyama et Kanmera,1975	South China	1.68	0.99	equatorial areas	Y	Fusiform	35
Verbeekinidae Staff et Wedekina,1910	Verb	Pseudodoliolina Yabe et Hanzawa,1932	Pseudodoliolina ozawai Yabe et Hanzawa,1932	South China	2.75	0.99	equatorial areas	Y	Fusiform	35
Verbeekinidae Staff et Wedekina,1910	Verb	Pseudodoliolina Yabe et Hanzawa,1932	Pseudodoliolina primigena Toriyama et Kanmera,1975	South China	2.9	1.02	equatorial areas	Y	Fusiform	35
Verbeekinidae Staff et Wedekina,1910	Verb	Pseudodoliolina Yabe et Hanzawa,1932	Pseudodoliolina saraburiensis Toriyama et Kanmera,1975	South China	2.74	1.16	equatorial areas	Y	Fusiform	35
Verbeekinidae Staff et Wedekina,1910	Verb	Pseudodoliolina Yabe et Hanzawa,1932	Pseudodoliolina primigena Toriyama et Kanmera,1975	South China	3.1	1.16	equatorial areas	Y	Fusiform	35
Verbeekinidae Staff et Wedekina,1910	Verb	Pseudodoliolina Yabe et Hanzawa,1932	Pseudodoliolina primigena Toriyama et Kanmera,1975	South China	3.1	1.19	equatorial areas	Y	Fusiform	35
Verbeekinidae Staff et Wedekina,1910	Verb	Pseudodoliolina Yabe et Hanzawa,1932	Pseudodoliolina saraburiensis Toriyama et Kanmera,1975	South China	2.75	1.21	equatorial areas	Y	Fusiform	35
Verbeekinidae Staff et Wedekina,1910	Verb	Pseudodoliolina Yabe et Hanzawa,1932	Pseudodoliolina ozawai Yabe et Hanzawa,1932	South China	3.05	1.28	equatorial areas	Y	Fusiform	35
Verbeekinidae Staff et Wedekina,1910	Verb	Pseudodoliolina Yabe et Hanzawa,1932	Pseudodoliolina ozawai Yabe et Hanzawa,1932	South China	3.39	1.28	equatorial areas	Y	Fusiform	35
Verbeekinidae Staff et Wedekina,1910	Verb	Pseudodoliolina Yabe et Hanzawa,1932	Pseudodoliolina primigena Toriyama et Kanmera,1975	South China	3.5	1.33	equatorial areas	Y	Fusiform	35
Verbeekinidae Staff et Wedekina,1910	Verb	Pseudodoliolina Yabe et Hanzawa,1932	Pseudodoliolina ozawai Yabe et Hanzawa,1932	South China	3.25	1.36	equatorial areas	Y	Fusiform	35
Verbeekinidae Staff et Wedekina,1910	Verb	Pseudodoliolina Yabe et Hanzawa,1932	Pseudodoliolina saraburiensis Toriyama et Kanmera,1975	South China	3.05	1.38	equatorial areas	Y	Fusiform	35
Verbeekinidae Staff et Wedekina,1910	Verb	Pseudodoliolina Yabe et Hanzawa,1932	Pseudodoliolina ozawai Yabe et Hanzawa,1932	South China	3.6	1.38	equatorial areas	Y	Fusiform	35
Verbeekinidae Staff et Wedekina,1910	Verb	Pseudodoliolina Yabe et Hanzawa,1932	Pseudodoliolina saraburiensis Toriyama et Kanmera,1975	South China	3	1.4	equatorial areas	Y	Fusiform	35
Verbeekinidae Staff et Wedekina,1910	Verb	Pseudodoliolina Yabe et Hanzawa,1932	Pseudodoliolina ozawai Yabe et Hanzawa,1932	South China	3.27	1.41	equatorial areas	Y	Fusiform	35
Verbeekinidae Staff et Wedekina,1910	Verb	Pseudodoliolina Yabe et Hanzawa,1932	Pseudodoliolina ozawai Yabe et Hanzawa,1932	South China	3.67	1.43	equatorial areas	Y	Fusiform	35
Verbeekinidae Staff et Wedekina,1910	Verb	Pseudodoliolina Yabe et Hanzawa,1932	Pseudodoliolina ozawai Yabe et Hanzawa,1932	South China	3.5	1.5	equatorial areas	Y	Fusiform	35
Verbeekinidae Staff et Wedekina,1910	Verb	Pseudodoliolina Yabe et Hanzawa,1932	Pseudodoliolina ozawai Yabe et Hanzawa,1932	South China	3.78	1.5	equatorial areas	Y	Fusiform	35
Verbeekinidae Staff et Wedekina,1910	Verb	Pseudodoliolina Yabe et Hanzawa,1932	Pseudodoliolina ozawai Yabe et Hanzawa,1932	South China	4.44	1.51	equatorial areas	Y	Fusiform	35
Verbeekinidae Staff et Wedekina,1910	Verb	Pseudodoliolina Yabe et Hanzawa,1932	Pseudodoliolina ozawai Yabe et Hanzawa,1932	South China	3.62	1.53	equatorial areas	Y	Fusiform	35
Verbeekinidae Staff et Wedekina,1910	Verb	Pseudodoliolina Yabe et Hanzawa,1932	Pseudodoliolina saraburiensis Toriyama et Kanmera,1975	South China	2.84	1.54	equatorial areas	Y	Fusiform	35
Verbeekinidae Staff et Wedekina,1910	Verb	Pseudodoliolina Yabe et Hanzawa,1932	Pseudodoliolina ozawai Yabe et Hanzawa,1932	South China	3.89	1.54	equatorial areas	Y	Fusiform	35
Verbeekinidae Staff et Wedekina,1910	Verb	Pseudodoliolina Yabe et Hanzawa,1932	Pseudodoliolina ozawai Yabe et Hanzawa,1932	South China	3.34	1.56	equatorial areas	Y	Fusiform	35
Verbeekinidae Staff et Wedekina,1910	Verb	Pseudodoliolina Yabe et Hanzawa,1932	Pseudodoliolina ozawai Yabe et Hanzawa,1932	South China	3.34	1.58	equatorial areas	Y	Fusiform	35
Verbeekinidae Staff et Wedekina,1910	Verb	Pseudodoliolina Yabe et Hanzawa,1932	Pseudodoliolina ozawai Yabe et Hanzawa,1932	South China	3.87	1.71	equatorial areas	Y	Fusiform	35
Verbeekinidae Staff et Wedekina,1910	Verb	Pseudodoliolina Yabe et Hanzawa,1932	Pseudodoliolina ozawai Yabe et Hanzawa,1932	South China	3.9	1.77	equatorial areas	Y	Fusiform	35
Verbeekinidae Staff et Wedekina,1910	Verb	Pseudodoliolina Yabe et Hanzawa,1932	Pseudodoliolina ozawai Yabe et Hanzawa,1932	South China	4.72	1.84	equatorial areas	Y	Fusiform	35
Verbeekinidae Staff et Wedekina,1910	Verb	Pseudodoliolina Yabe et Hanzawa,1932	Pseudodoliolina ozawai Yabe et Hanzawa,1932	South China	3.94	1.85	equatorial areas	Y	Fusiform	35
Verbeekinidae Staff et Wedekina,1910	Verb	Pseudodoliolina Yabe et Hanzawa,1932	Pseudodoliolina ozawai Yabe et Hanzawa,1932	South China	4.42	1.92	equatorial areas	Y	Fusiform	35
Verbeekinidae Staff et Wedekina,1910	Verb	Pseudodoliolina Yabe et Hanzawa,1932	Pseudodoliolina ozawai Yabe et Hanzawa,1932	South China	4.62	1.92	equatorial areas	Y	Fusiform	35
Verbeekinidae Staff et Wedekina,1910	Verb	Pseudodoliolina Yabe et Hanzawa,1932	Pseudodoliolina chinghaiensis Sheng,1958	South China	3.54	2.01	equatorial areas	Y	Fusiform	35
Verbeekinidae Staff et Wedekina,1910	Verb	Pseudodoliolina Yabe et Hanzawa,1932	Pseudodoliolina chinghaiensis Sheng,1958	South China	3.9	2.01	equatorial areas	Y	Fusiform	35
Verbeekinidae Staff et Wedekina,1910	Verb	Pseudodoliolina Yabe et Hanzawa,1932	Pseudodoliolina ozawai Yabe et Hanzawa,1932	South China	4.34	2.02	equatorial areas	Y	Fusiform	35
Verbeekinidae Staff et Wedekina,1910	Verb	Pseudodoliolina Yabe et Hanzawa,1932	Pseudodoliolina chinghaiensis Sheng,1958	South China	3.84	2.03	equatorial areas	Y	Fusiform	35
Verbeekinidae Staff et Wedekina,1910	Verb	Pseudodoliolina Yabe et Hanzawa,1932	Pseudodoliolina chinghaiensis Sheng,1958	South China	3.64	2.06	equatorial areas	Y	Fusiform	35
Verbeekinidae Staff et Wedekina,1910	Verb	Pseudodoliolina Yabe et Hanzawa,1932	Pseudodoliolina chinghaiensis Sheng,1958	South China	3.84	2.08	equatorial areas	Y	Fusiform	35
Verbeekinidae Staff et Wedekina,1910	Verb	Pseudodoliolina Yabe et Hanzawa,1932	Pseudodoliolina chinghaiensis Sheng,1958	South China	4.1	2.18	equatorial areas	Y	Fusiform	35
Verbeekinidae Staff et Wedekina,1910	Verb	Pseudodoliolina Yabe et Hanzawa,1932	Pseudodoliolina chinghaiensis Sheng,1958	South China	3.84	2.31	equatorial areas	Y	Fusiform	35
Verbeekinidae Staff et Wedekina,1910	Verb	Pseudodoliolina Yabe et Hanzawa,1932	Pseudodoliolina ozawai Yabe et Hanzawa,1932	South China	4.44	2.31	equatorial areas	Y	Fusiform	35
Verbeekinidae Staff et Wedekina,1910	Verb	Pseudodoliolina Yabe et Hanzawa,1932	Pseudodoliolina chinghaiensis Sheng,1958	South China	4.04	2.35	equatorial areas	Y	Fusiform	35
Verbeekinidae Staff et Wedekina,1910	Verb	Pseudodoliolina Yabe et Hanzawa,1932	Pseudodoliolina pseudolepida (Deprat,1912)	South China	5.53	2.51	equatorial areas	Y	Fusiform	35
Verbeekinidae Staff et Wedekina,1910	Verb	Pseudodoliolina Yabe et Hanzawa,1932	Pseudodoliolina chinghaiensis Sheng,1958	South China	4.3	2.6	equatorial areas	Y	Fusiform	35
Verbeekinidae Staff et Wedekina,1910	Verb	Pseudodoliolina Yabe et Hanzawa,1932	Pseudodoliolina pseudolepida (Deprat,1912)	South China	5.26	2.67	equatorial areas	Y	Fusiform	35
Verbeekinidae Staff et Wedekina,1910	Verb	Pseudodoliolina Yabe et Hanzawa,1932	Pseudodoliolina chinghaiensis Sheng,1958	South China	4.8	2.7	equatorial areas	Y	Fusiform	35
Verbeekinidae Staff et Wedekina,1910	Verb	Pseudodoliolina Yabe et Hanzawa,1932	Pseudodoliolina chinghaiensis Sheng,1958	South China	5.9	2.74	equatorial areas	Y	Fusiform	35
Verbeekinidae Staff et Wedekina,1910	Verb	Pseudodoliolina Yabe et Hanzawa,1932	Pseudodoliolina chinghaiensis Sheng,1958	South China	5.9	2.74	equatorial areas	Y	Fusiform	35
Verbeekinidae Staff et Wedekina,1910	Verb	Pseudodoliolina Yabe et Hanzawa,1932	Pseudodoliolina pseudolepida (Deprat,1912)	South China	7.38	3.34	equatorial areas	Y	Fusiform	35
Ozawainellidae Thompson et Foster,1937	Oza	Reichelina Erk,1941	Reichelina cribroseptata Erk,1941	South China	0.4	1.2	equatorial areas	N	Lenticular	35
Schubertellidae Skinner,1931	Schu	Russiella M.-Maclay,1957	Russiella pulchra (A.M.Maclay, 1957)	South China	1.736	0.474	equatorial areas	N	Fusiform	35
Schubertellidae Skinner,1931	Schu	Russiella M.-Maclay,1957	Russiella pulchra (A.M.Maclay, 1957)	South China	1.84	0.53	equatorial areas	N	Fusiform	35
Staffellidae A.D.Miklukho-Maklay, 1949	Staff	Sazhiella Dong,1984	Sazhiella liuzhiensis Dong, 1984	South China	2.87	4.86	equatorial areas	N	Lenticular	35
Schwagerinidae Dunbar et Henbest,1930	Schwag	Schwagerina Moeller,1877	Schwagerina pseudoyui Zhang et Dong,1986	South China	1.94	0.51	equatorial areas	Y	Fusiform	35
Schwagerinidae Dunbar et Henbest,1930	Schwag	Schwagerina Moeller,1877	Schwagerina pseudoyui Zhang et Dong,1986	South China	2.25	0.53	equatorial areas	Y	Fusiform	35
Schwagerinidae Dunbar et Henbest,1930	Schwag	Schwagerina Moeller,1877	Schwagerina pseudoyui Zhang et Dong,1986	South China	2.4	0.78	equatorial areas	Y	Fusiform	35
Schwagerinidae Dunbar et Henbest,1930	Schwag	Schwagerina Moeller,1877	Schwagerina quasiregularis Sheng,1963	South China	3.79	1.41	equatorial areas	Y	Fusiform	35
Schwagerinidae Dunbar et Henbest,1930	Schwag	Schwagerina Moeller,1877	Schwagerina pseudocompacta Sheng,1956	South China	5.37	2.11	equatorial areas	Y	Fusiform	35
Schwagerinidae Dunbar et Henbest,1930	Schwag	Schwagerina Moeller,1877	Schwagerina multialveola Chen,1956	South China	6.7	2.62	equatorial areas	Y	Fusiform	35
Schwagerinidae Dunbar et Henbest,1930	Schwag	Schwagerina Moeller,1877	Schwagerina multialveola Chen,1956	South China	7.01	2.84	equatorial areas	Y	Fusiform	35
Schwagerinidae Dunbar et Henbest,1930	Schwag	Schwagerina Moeller,1877	Schwagerina pindingensis Sheng, 1963	South China	5	2.94	equatorial areas	Y	Fusiform	35
Schwagerinidae Dunbar et Henbest,1930	Schwag	Schwagerina Moeller,1877	Schwagerina pindingensis Sheng, 1963	South China	6.33	2.94	equatorial areas	Y	Fusiform	35
Schwagerinidae Dunbar et Henbest,1930	Schwag	Schwagerina Moeller,1877	Schwagerina tienchiaensis Chen,1956	South China	5.7	3.07	equatorial areas	Y	Fusiform	35
Schwagerinidae Dunbar et Henbest,1930	Schwag	Schwagerina Moeller,1877	Schwagerina compacta (White,1932)	South China	8.34	3.09	equatorial areas	Y	Fusiform	35
Schwagerinidae Dunbar et Henbest,1930	Schwag	Sosioella Skinner et Wilde,1966	Chusenella(Sosioella) sosioensis Pasini,1964	South China	12	4.06	equatorial areas	Y	Fusiform	35
Neoschwagerinidae Dunbar et Condra,1927	Neo	Sumatrina Volz,1904	Sumatrina longissima Deprat,1914	South China	3.15	0.93	equatorial areas	Y	Fusiform	35
Neoschwagerinidae Dunbar et Condra,1927	Neo	Sumatrina Volz,1904	Sumatrina longissima Deprat,1914	South China	4.25	1.15	equatorial areas	Y	Fusiform	35
Neoschwagerinidae Dunbar et Condra,1927	Neo	Sumatrina Volz,1904	Sumatrina annae Volz,1904	South China	3.54	1.24	equatorial areas	Y	Fusiform	35
Neoschwagerinidae Dunbar et Condra,1927	Neo	Sumatrina Volz,1904	Sumatrina longissima Deprat,1914	South China	5.07	1.34	equatorial areas	Y	Fusiform	35
Neoschwagerinidae Dunbar et Condra,1927	Neo	Sumatrina Volz,1904	Sumatrina fusiformis Sheng,1958	South China	5.41	1.52	equatorial areas	Y	Fusiform	35
Neoschwagerinidae Dunbar et Condra,1927	Neo	Sumatrina Volz,1904	Sumatrina longissima Deprat,1914	South China	5.09	1.58	equatorial areas	Y	Fusiform	35
Neoschwagerinidae Dunbar et Condra,1927	Neo	Sumatrina Volz,1904	Sumatrina annae Volz,1904	South China	4.84	1.67	equatorial areas	Y	Fusiform	35
Neoschwagerinidae Dunbar et Condra,1927	Neo	Sumatrina Volz,1904	Sumatrina annae Volz,1904	South China	5.11	1.75	equatorial areas	Y	Fusiform	35
Neoschwagerinidae Dunbar et Condra,1927	Neo	Sumatrina Volz,1904	Sumatrina annae Volz,1904	South China	4.5	1.84	equatorial areas	Y	Fusiform	35
Neoschwagerinidae Dunbar et Condra,1927	Neo	Sumatrina Volz,1904	Sumatrina annae Volz,1904	South China	4.87	1.85	equatorial areas	Y	Fusiform	35
Neoschwagerinidae Dunbar et Condra,1927	Neo	Sumatrina Volz,1904	Sumatrina annae Volz,1904	South China	4.24	1.87	equatorial areas	Y	Fusiform	35
Neoschwagerinidae Dunbar et Condra,1927	Neo	Sumatrina Volz,1904	Sumatrina longissima Deprat,1914	South China	9.7	1.94	equatorial areas	Y	Fusiform	35
Neoschwagerinidae Dunbar et Condra,1927	Neo	Sumatrina Volz,1904	Sumatrina annae Volz,1904	South China	6	2.06	equatorial areas	Y	Fusiform	35
Neoschwagerinidae Dunbar et Condra,1927	Neo	Sumatrina Volz,1904	Sumatrina fusiformis Sheng,1958	South China	7.1	2.06	equatorial areas	Y	Fusiform	35
Neoschwagerinidae Dunbar et Condra,1927	Neo	Sumatrina Volz,1904	Sumatrina annae Volz,1904	South China	5.84	2.14	equatorial areas	Y	Fusiform	35
Neoschwagerinidae Dunbar et Condra,1927	Neo	Sumatrina Volz,1904	Sumatrina annae Volz,1904	South China	5.33	2.21	equatorial areas	Y	Fusiform	35
Neoschwagerinidae Dunbar et Condra,1927	Neo	Sumatrina Volz,1904	Sumatrina brevis Leven,1967	South China	4	2.31	equatorial areas	Y	Fusiform	35
Neoschwagerinidae Dunbar et Condra,1927	Neo	Sumatrina Volz,1904	Sumatrina annae Volz,1904	South China	5.44	2.35	equatorial areas	Y	Fusiform	35
Neoschwagerinidae Dunbar et Condra,1927	Neo	Sumatrina Volz,1904	Sumatrina annae Volz,1904	South China	5.4	2.38	equatorial areas	Y	Fusiform	35
Verbeekinidae Staff et Wedekina,1910	Verb	Verbeekina Staff,1909	Verbeekina sphaera Ozawa,1927	South China	1.82	1.6	equatorial areas	Y	Fusiform	35
Verbeekinidae Staff et Wedekina,1910	Verb	Verbeekina Staff,1909	Verbeekina sphaera Ozawa,1927	South China	2.01	1.85	equatorial areas	Y	Fusiform	35
Verbeekinidae Staff et Wedekina,1910	Verb	Verbeekina Staff,1909	Verbeekina sphaera Ozawa,1927	South China	2.13	1.92	equatorial areas	Y	Fusiform	35
Verbeekinidae Staff et Wedekina,1910	Verb	Verbeekina Staff,1909	Verbeekina sphaera Ozawa,1927	South China	2.77	2.56	equatorial areas	Y	Fusiform	35
Verbeekinidae Staff et Wedekina,1910	Verb	Verbeekina Staff,1909	Verbeekina sphaera Ozawa,1927	South China	3.24	2.87	equatorial areas	Y	Fusiform	35
Verbeekinidae Staff et Wedekina,1910	Verb	Verbeekina Staff,1909	Verbeekina sphaera Ozawa,1927	South China	3.27	2.9	equatorial areas	Y	Fusiform	35
Verbeekinidae Staff et Wedekina,1910	Verb	Verbeekina Staff,1909	Verbeekina verbeeki (Geinitz,1876)	South China	3.31	2.9	equatorial areas	Y	Fusiform	35
Verbeekinidae Staff et Wedekina,1910	Verb	Verbeekina Staff,1909	Verbeekina intermedia Zhang et Dong,1986	South China	3.44	3.12	equatorial areas	Y	Fusiform	35
Verbeekinidae Staff et Wedekina,1910	Verb	Verbeekina Staff,1909	Verbeekina intermedia Zhang et Dong,1986	South China	4.12	3.69	equatorial areas	Y	Fusiform	35
Verbeekinidae Staff et Wedekina,1910	Verb	Verbeekina Staff,1909	Verbeekina intermedia Zhang et Dong,1986	South China	4.1	3.77	equatorial areas	Y	Fusiform	35
Verbeekinidae Staff et Wedekina,1910	Verb	Verbeekina Staff,1909	Verbeekina intermedia Zhang et Dong,1986	South China	3.72	3.84	equatorial areas	Y	Fusiform	35
Verbeekinidae Staff et Wedekina,1910	Verb	Verbeekina Staff,1909	Verbeekina intermedia Zhang et Dong,1986	South China	4.04	4.04	equatorial areas	Y	Fusiform	35
Verbeekinidae Staff et Wedekina,1910	Verb	Verbeekina Staff,1909	Verbeekina intermedia Zhang et Dong,1986	South China	4.3	4.22	equatorial areas	Y	Fusiform	35
Verbeekinidae Staff et Wedekina,1910	Verb	Verbeekina Staff,1909	Verbeekina inflata Xiao, Zhang and Dong, 1986	South China	4.9	5.53	equatorial areas	Y	Fusiform	35
Verbeekinidae Staff et Wedekina,1910	Verb	Verbeekina Staff,1909	Verbeekina verbeeki (Geinitz,1876)	South China	7.18	6.15	equatorial areas	Y	Fusiform	35
Verbeekinidae Staff et Wedekina,1910	Verb	Verbeekina Staff,1909	Verbeekina dorsata Yang,1978	South China	5.1	6.17	equatorial areas	Y	Fusiform	35
Verbeekinidae Staff et Wedekina,1910	Verb	Verbeekina Staff,1909	Verbeekina inflata Xiao, Zhang and Dong, 1986	South China	5.9	7.1	equatorial areas	Y	Fusiform	35
Verbeekinidae Staff et Wedekina,1910	Verb	Verbeekina Staff,1909	Verbeekina tenuispira Sheng,1963	South China	8.3	8	equatorial areas	Y	Fusiform	35
Verbeekinidae Staff et Wedekina,1910	Verb	Verbeekina Staff,1909	Verbeekina tenuispira Sheng,1963	South China	8.3	8.5	equatorial areas	Y	Fusiform	35
Neoschwagerinidae Dunbar et Condra,1927	Neo	Yabeina Deprat,1914	Yabeina triangula Zhang et Dong,1986	South China	3.84	2.28	equatorial areas	Y	Fusiform	35
Neoschwagerinidae Dunbar et Condra,1927	Neo	Yabeina Deprat,1914	Yabeina quasigubleri Liu,Xiao et Dong,1978	South China	6.03	2.91	equatorial areas	Y	Fusiform	35
Neoschwagerinidae Dunbar et Condra,1927	Neo	Yabeina Deprat,1914	Yabeina quasigubleri Liu,Xiao et Dong,1978	South China	4.67	2.98	equatorial areas	Y	Fusiform	35
Neoschwagerinidae Dunbar et Condra,1927	Neo	Yabeina Deprat,1914	Yabeina subrhomboides Zhang et Dong,1986	South China	9.2	3.95	equatorial areas	Y	Fusiform	35
Neoschwagerinidae Dunbar et Condra,1927	Neo	Yabeina Deprat,1914	Yabeina gubleri Kanmera,1954	South China	8.5	4.15	equatorial areas	Y	Fusiform	35
Neoschwagerinidae Dunbar et Condra,1927	Neo	Yabeina Deprat,1914	Yabeina gubleri Kanmera,1954	South China	9.8	4.27	equatorial areas	Y	Fusiform	35
Neoschwagerinidae Dunbar et Condra,1927	Neo	Yabeina Deprat,1914	Yabeina kwangsiana (Lee,1933)	South China	9.4	4.4	equatorial areas	Y	Fusiform	35
Neoschwagerinidae Dunbar et Condra,1927	Neo	Yabeina Deprat,1914	Yabeina quasigubleri Liu,Xiao et Dong,1978	South China	12	5.22	equatorial areas	Y	Fusiform	35
Schubertellidae Skinner,1931	Schu	Yangchienia Lee,1933	Yangchienia compressa (Ozawa,1927)	South China	2.35	1.02	equatorial areas	N	Fusiform	35
Schubertellidae Skinner,1931	Schu	Yangchienia Lee,1933	Yangchienia quasikwangsiensis Liu,Xiao et Dong,1978	South China	3.5	1.13	equatorial areas	N	Fusiform	35
Schubertellidae Skinner,1931	Schu	Yangchienia Lee,1933	Yangchienia compressa (Ozawa,1927)	South China	2.7	1.21	equatorial areas	N	Fusiform	35
Schubertellidae Skinner,1931	Schu	Yangchienia Lee,1933	Yangchienia compressa (Ozawa,1927)	South China	2.74	1.21	equatorial areas	N	Fusiform	35
Schubertellidae Skinner,1931	Schu	Yangchienia Lee,1933	Yangchienia iniqua Lee,1933	South China	2.38	1.37	equatorial areas	N	Fusiform	35
Schubertellidae Skinner,1931	Schu	Yangchienia Lee,1933	Yangchienia iniqua Lee,1933	South China	2.4	1.37	equatorial areas	N	Fusiform	35
Schubertellidae Skinner,1931	Schu	Yangchienia Lee,1933	Yangchienia haydeni Thompson,1946	South China	2.84	1.41	equatorial areas	N	Fusiform	35
Schubertellidae Skinner,1931	Schu	Yangchienia Lee,1933	Yangchienia quasikwangsiensis Liu,Xiao et Dong,1978	South China	3.4	1.44	equatorial areas	N	Fusiform	35
Schubertellidae Skinner,1931	Schu	Yangchienia Lee,1933	Yangchienia haydeni Thompson,1946	South China	2.87	1.45	equatorial areas	N	Fusiform	35
Schubertellidae Skinner,1931	Schu	Yangchienia Lee,1933	Yangchienia haydeni Thompson,1946	South China	3.34	1.56	equatorial areas	N	Fusiform	35
Schubertellidae Skinner,1931	Schu	Yangchienia Lee,1933	Yangchienia haydeni Thompson,1946	South China	2.04	1.87	equatorial areas	N	Fusiform	35
Ozawainellidae Thompson et Foster,1937	Oza	Chenella M.-Maclay,1959	Chenella changanchiaoensis (Sheng and Wang,1962)	South China	0.29	0.5	equatorial areas	N	Lenticular	35	[41]
Ozawainellidae Thompson et Foster,1937	Oza	Chenella M.-Maclay,1959	Chenella changanchiaoensis (Sheng and Wang,1962)	South China	0.2	0.52	equatorial areas	N	Lenticular	35
Ozawainellidae Thompson et Foster,1937	Oza	Chenella M.-Maclay,1959	Chenella changanchiaoensis (Sheng and Wang,1962)	South China	0.23	0.65	equatorial areas	N	Lenticular	35
Ozawainellidae Thompson et Foster,1937	Oza	Chenella M.-Maclay,1959	Chenella changanchiaoensis (Sheng and Wang,1962)	South China	0.44	0.94	equatorial areas	N	Lenticular	35
Ozawainellidae Thompson et Foster,1937	Oza	Chenella M.-Maclay,1959	Chenella changanchiaoensis (Sheng and Wang,1962)	South China	0.45	1.04	equatorial areas	N	Lenticular	35
Schwagerinidae Dunbar et Henbest,1930	Schwag	Chusenella Hsu,1942	Chusenella sinensis Sheng,1963	South China	4.28	1.4	equatorial areas	Y	Fusiform	35
Schwagerinidae Dunbar et Henbest,1930	Schwag	Chusenella Hsu,1942	Chusenella sinensis Sheng,1963	South China	4.17	1.62	equatorial areas	Y	Fusiform	35
Schwagerinidae Dunbar et Henbest,1930	Schwag	Chusenella Hsu,1942	Chusenella sinensis Sheng,1963	South China	5.15	1.75	equatorial areas	Y	Fusiform	35
Schwagerinidae Dunbar et Henbest,1930	Schwag	Chusenella Hsu,1942	Chusenella sinensis Sheng,1963	South China	5.01	1.89	equatorial areas	Y	Fusiform	35
Schubertellidae Skinner,1931	Schu	Codonofusiella Dunbar et Skinner,1937	Codonofusiella schubertelloides Sheng,1956	South China	0.51	0.27	equatorial areas	N	Fusiform	35
Schubertellidae Skinner,1931	Schu	Codonofusiella Dunbar et Skinner,1937	Codonofusiella wusiana Sheng et Wang,1962	South China	0.73	0.38	equatorial areas	N	Fusiform	35
Schwagerinidae Dunbar et Henbest,1930	Schwag	Eopolydiexodina Wilde,1975	Eopolydiexodina chekiangensis Sheng, 1962	South China	6.5	1.18	equatorial areas	Y	Fusiform	35
Schwagerinidae Dunbar et Henbest,1930	Schwag	Eopolydiexodina Wilde,1975	Eopolydiexodina chekiangensis lengwuensis Sheng,1962	South China	8.38	1.53	equatorial areas	Y	Fusiform	35
Schwagerinidae Dunbar et Henbest,1930	Schwag	Eopolydiexodina Wilde,1975	Eopolydiexodina chekiangensis Sheng, 1962	South China	6.35	1.61	equatorial areas	Y	Fusiform	35
Schwagerinidae Dunbar et Henbest,1930	Schwag	Eopolydiexodina Wilde,1975	Eopolydiexodina chekiangensis Sheng, 1962	South China	11.5	1.73	equatorial areas	Y	Fusiform	35
Schwagerinidae Dunbar et Henbest,1930	Schwag	Eopolydiexodina Wilde,1975	Eopolydiexodina chekiangensis lengwuensis Sheng,1962	South China	9.71	1.84	equatorial areas	Y	Fusiform	35
Schwagerinidae Dunbar et Henbest,1930	Schwag	Eopolydiexodina Wilde,1975	Eopolydiexodina chekiangensis Sheng, 1962	South China	9.01	1.88	equatorial areas	Y	Fusiform	35
Schwagerinidae Dunbar et Henbest,1930	Schwag	Eopolydiexodina Wilde,1975	Eopolydiexodina chekiangensis Sheng, 1962	South China	9.5	1.88	equatorial areas	Y	Fusiform	35
Schwagerinidae Dunbar et Henbest,1930	Schwag	Eopolydiexodina Wilde,1975	Eopolydiexodina chekiangensis Sheng, 1962	South China	12.2	1.9	equatorial areas	Y	Fusiform	35
Schwagerinidae Dunbar et Henbest,1930	Schwag	Eopolydiexodina Wilde,1975	Eopolydiexodina chekiangensis lengwuensis Sheng,1962	South China	9.6	1.99	equatorial areas	Y	Fusiform	35
Schwagerinidae Dunbar et Henbest,1930	Schwag	Eopolydiexodina Wilde,1975	Eopolydiexodina chekiangensis Sheng, 1962	South China	9.09	2.06	equatorial areas	Y	Fusiform	35
Schwagerinidae Dunbar et Henbest,1930	Schwag	Eopolydiexodina Wilde,1975	Eopolydiexodina chekiangensis lengwuensis Sheng,1962	South China	12.6	2.09	equatorial areas	Y	Fusiform	35
Schwagerinidae Dunbar et Henbest,1930	Schwag	Eopolydiexodina Wilde,1975	Eopolydiexodina chekiangensis Sheng, 1962	South China	9.35	2.16	equatorial areas	Y	Fusiform	35
Schwagerinidae Dunbar et Henbest,1930	Schwag	Eopolydiexodina Wilde,1975	Eopolydiexodina chekiangensis Sheng, 1962	South China	10.43	2.18	equatorial areas	Y	Fusiform	35
Schwagerinidae Dunbar et Henbest,1930	Schwag	Eopolydiexodina Wilde,1975	Eopolydiexodina chekiangensis lengwuensis Sheng,1962	South China	10.02	2.28	equatorial areas	Y	Fusiform	35
Schwagerinidae Dunbar et Henbest,1930	Schwag	Eopolydiexodina Wilde,1975	Eopolydiexodina chekiangensis Sheng, 1962	South China	9.45	2.33	equatorial areas	Y	Fusiform	35
Schwagerinidae Dunbar et Henbest,1930	Schwag	Eopolydiexodina Wilde,1975	Eopolydiexodina chekiangensis Sheng, 1962	South China	12.33	2.35	equatorial areas	Y	Fusiform	35
Schwagerinidae Dunbar et Henbest,1930	Schwag	Eopolydiexodina Wilde,1975	Eopolydiexodina chekiangensis Sheng, 1962	South China	11.42	2.36	equatorial areas	Y	Fusiform	35
Schwagerinidae Dunbar et Henbest,1930	Schwag	Eopolydiexodina Wilde,1975	Eopolydiexodina chekiangensis Sheng, 1962	South China	11.88	2.38	equatorial areas	Y	Fusiform	35
Schwagerinidae Dunbar et Henbest,1930	Schwag	Eopolydiexodina Wilde,1975	Eopolydiexodina chekiangensis Sheng, 1962	South China	11.98	2.38	equatorial areas	Y	Fusiform	35
Schwagerinidae Dunbar et Henbest,1930	Schwag	Eopolydiexodina Wilde,1975	Eopolydiexodina chekiangensis lengwuensis Sheng,1962	South China	11.92	2.4	equatorial areas	Y	Fusiform	35
Schwagerinidae Dunbar et Henbest,1930	Schwag	Eopolydiexodina Wilde,1975	Eopolydiexodina chekiangensis Sheng, 1962	South China	10.35	2.41	equatorial areas	Y	Fusiform	35
Schwagerinidae Dunbar et Henbest,1930	Schwag	Eopolydiexodina Wilde,1975	Eopolydiexodina chekiangensis Sheng, 1962	South China	10.75	2.5	equatorial areas	Y	Fusiform	35
Schwagerinidae Dunbar et Henbest,1930	Schwag	Eopolydiexodina Wilde,1975	Eopolydiexodina chekiangensis Sheng, 1962	South China	12.02	2.52	equatorial areas	Y	Fusiform	35
Schwagerinidae Dunbar et Henbest,1930	Schwag	Eopolydiexodina Wilde,1975	Eopolydiexodina chekiangensis Sheng, 1962	South China	11.52	2.54	equatorial areas	Y	Fusiform	35
Schwagerinidae Dunbar et Henbest,1930	Schwag	Eopolydiexodina Wilde,1975	Eopolydiexodina chekiangensis Sheng, 1962	South China	10.02	2.63	equatorial areas	Y	Fusiform	35
Schwagerinidae Dunbar et Henbest,1930	Schwag	Eopolydiexodina Wilde,1975	Eopolydiexodina chekiangensis Sheng, 1962	South China	10.35	2.64	equatorial areas	Y	Fusiform	35
Schwagerinidae Dunbar et Henbest,1930	Schwag	Eopolydiexodina Wilde,1975	Eopolydiexodina chekiangensis Sheng, 1962	South China	11.05	2.65	equatorial areas	Y	Fusiform	35
Schwagerinidae Dunbar et Henbest,1930	Schwag	Eopolydiexodina Wilde,1975	Eopolydiexodina chekiangensis Sheng, 1962	South China	13.25	2.65	equatorial areas	Y	Fusiform	35
Schwagerinidae Dunbar et Henbest,1930	Schwag	Eopolydiexodina Wilde,1975	Eopolydiexodina chekiangensis Sheng, 1962	South China	15.33	2.67	equatorial areas	Y	Fusiform	35
Schwagerinidae Dunbar et Henbest,1930	Schwag	Eopolydiexodina Wilde,1975	Eopolydiexodina chekiangensis Sheng, 1962	South China	11.12	2.77	equatorial areas	Y	Fusiform	35
Schwagerinidae Dunbar et Henbest,1930	Schwag	Eopolydiexodina Wilde,1975	Eopolydiexodina chekiangensis Sheng, 1962	South China	11.52	2.82	equatorial areas	Y	Fusiform	35
Schwagerinidae Dunbar et Henbest,1930	Schwag	Eopolydiexodina Wilde,1975	Eopolydiexodina chekiangensis Sheng, 1962	South China	18.33	2.87	equatorial areas	Y	Fusiform	35
Schwagerinidae Dunbar et Henbest,1930	Schwag	Eopolydiexodina Wilde,1975	Eopolydiexodina chekiangensis Sheng, 1962	South China	15.85	2.93	equatorial areas	Y	Fusiform	35
Schwagerinidae Dunbar et Henbest,1930	Schwag	Eopolydiexodina Wilde,1975	Eopolydiexodina chekiangensis Sheng, 1962	South China	13.5	3	equatorial areas	Y	Fusiform	35
Schwagerinidae Dunbar et Henbest,1930	Schwag	Eopolydiexodina Wilde,1975	Eopolydiexodina chekiangensis lengwuensis Sheng,1962	South China	15.25	3.05	equatorial areas	Y	Fusiform	35
Verbeekinidae Staff et Wedekina,1910	Verb	Kahlerina Kochansky-Devidie et Ramovs,1955	Kahlerina minima Sheng,1963	South China	0.63	0.62	equatorial areas	Y	Fusiform	35
Verbeekinidae Staff et Wedekina,1910	Verb	Kahlerina Kochansky-Devidie et Ramovs,1955	Kahlerina sinensis Sheng,1963	South China	1.32	1.29	equatorial areas	Y	Fusiform	35
Verbeekinidae Staff et Wedekina,1910	Verb	Metadoliolina Ishii et Nogami,1961	Metadoliolina compacta (Chen,1956)	South China	2.35	0.89	equatorial areas	Y	Fusiform	35
Verbeekinidae Staff et Wedekina,1910	Verb	Metadoliolina Ishii et Nogami,1961	Metadoliolina compacta (Chen,1956)	South China	2.45	1.13	equatorial areas	Y	Fusiform	35
Verbeekinidae Staff et Wedekina,1910	Verb	Metadoliolina Ishii et Nogami,1961	Metadoliolina compacta (Chen,1956)	South China	3.59	1.4	equatorial areas	Y	Fusiform	35
Verbeekinidae Staff et Wedekina,1910	Verb	Metadoliolina Ishii et Nogami,1961	Metadoliolina compacta (Chen,1956)	South China	4.55	1.84	equatorial areas	Y	Fusiform	35
Verbeekinidae Staff et Wedekina,1910	Verb	Metadoliolina Ishii et Nogami,1961	Metadoliolina compacta (Chen,1956)	South China	4.5	1.92	equatorial areas	Y	Fusiform	35
Verbeekinidae Staff et Wedekina,1910	Verb	Metadoliolina Ishii et Nogami,1961	Metadoliolina compacta (Chen,1956)	South China	3.9	2	equatorial areas	Y	Fusiform	35
Verbeekinidae Staff et Wedekina,1910	Verb	Metadoliolina Ishii et Nogami,1961	Metadoliolina compacta (Chen,1956)	South China	5.3	2.05	equatorial areas	Y	Fusiform	35
Verbeekinidae Staff et Wedekina,1910	Verb	Metadoliolina Ishii et Nogami,1961	Metadoliolina compacta (Chen,1956)	South China	4.85	2.08	equatorial areas	Y	Fusiform	35
Verbeekinidae Staff et Wedekina,1910	Verb	Metadoliolina Ishii et Nogami,1961	Metadoliolina brevicylindrica (Liu,Dong et Xiao,1978)	South China	3.53	2.1	equatorial areas	Y	Fusiform	35
Verbeekinidae Staff et Wedekina,1910	Verb	Metadoliolina Ishii et Nogami,1961	Metadoliolina compacta (Chen,1956)	South China	5.68	2.18	equatorial areas	Y	Fusiform	35
Verbeekinidae Staff et Wedekina,1910	Verb	Metadoliolina Ishii et Nogami,1961	Metadoliolina compacta (Chen,1956)	South China	4.75	2.2	equatorial areas	Y	Fusiform	35
Verbeekinidae Staff et Wedekina,1910	Verb	Metadoliolina Ishii et Nogami,1961	Metadoliolina compacta (Chen,1956)	South China	6	2.25	equatorial areas	Y	Fusiform	35
Verbeekinidae Staff et Wedekina,1910	Verb	Metadoliolina Ishii et Nogami,1961	Metadoliolina compacta (Chen,1956)	South China	5.34	2.41	equatorial areas	Y	Fusiform	35
Verbeekinidae Staff et Wedekina,1910	Verb	Metadoliolina Ishii et Nogami,1961	Metadoliolina lepida (Schwager,1883)	South China	5.35	2.49	equatorial areas	Y	Fusiform	35
Verbeekinidae Staff et Wedekina,1910	Verb	Metadoliolina Ishii et Nogami,1961	Metadoliolina lepida (Schwager,1883)	South China	5.48	2.54	equatorial areas	Y	Fusiform	35
Verbeekinidae Staff et Wedekina,1910	Verb	Metadoliolina Ishii et Nogami,1961	Metadoliolina lepida (Schwager,1883)	South China	6.05	2.54	equatorial areas	Y	Fusiform	35
Verbeekinidae Staff et Wedekina,1910	Verb	Metadoliolina Ishii et Nogami,1961	Metadoliolina lepida (Schwager,1883)	South China	5.52	2.55	equatorial areas	Y	Fusiform	35
Verbeekinidae Staff et Wedekina,1910	Verb	Metadoliolina Ishii et Nogami,1961	Metadoliolina lepida (Schwager,1883)	South China	5.51	2.7	equatorial areas	Y	Fusiform	35
Verbeekinidae Staff et Wedekina,1910	Verb	Metadoliolina Ishii et Nogami,1961	Metadoliolina lepida (Schwager,1883)	South China	6.02	2.74	equatorial areas	Y	Fusiform	35
Verbeekinidae Staff et Wedekina,1910	Verb	Metadoliolina Ishii et Nogami,1961	Metadoliolina brevicylindrica (Liu,Dong et Xiao,1978)	South China	4.6	2.81	equatorial areas	Y	Fusiform	35
Verbeekinidae Staff et Wedekina,1910	Verb	Metadoliolina Ishii et Nogami,1961	Metadoliolina brevicylindrica (Liu,Dong et Xiao,1978)	South China	5.75	2.88	equatorial areas	Y	Fusiform	35
Verbeekinidae Staff et Wedekina,1910	Verb	Metadoliolina Ishii et Nogami,1961	Metadoliolina brevicylindrica (Liu,Dong et Xiao,1978)	South China	5.34	2.89	equatorial areas	Y	Fusiform	35
Verbeekinidae Staff et Wedekina,1910	Verb	Metadoliolina Ishii et Nogami,1961	Metadoliolina lepida (Schwager,1883)	South China	7.55	3.17	equatorial areas	Y	Fusiform	35
Verbeekinidae Staff et Wedekina,1910	Verb	Metadoliolina Ishii et Nogami,1961	Metadoliolina lepida (Schwager,1883)	South China	6.88	3.23	equatorial areas	Y	Fusiform	35
Verbeekinidae Staff et Wedekina,1910	Verb	Metadoliolina Ishii et Nogami,1961	Metadoliolina brevicylindrica (Liu,Dong et Xiao,1978)	South China	5.99	3.26	equatorial areas	Y	Fusiform	35
Verbeekinidae Staff et Wedekina,1910	Verb	Metadoliolina Ishii et Nogami,1961	Metadoliolina brevicylindrica (Liu,Dong et Xiao,1978)	South China	5.78	3.33	equatorial areas	Y	Fusiform	35
Verbeekinidae Staff et Wedekina,1910	Verb	Metadoliolina Ishii et Nogami,1961	Metadoliolina lepida (Schwager,1883)	South China	7.84	3.34	equatorial areas	Y	Fusiform	35
Verbeekinidae Staff et Wedekina,1910	Verb	Metadoliolina Ishii et Nogami,1961	Metadoliolina brevicylindrica (Liu,Dong et Xiao,1978)	South China	6.95	3.39	equatorial areas	Y	Fusiform	35
Verbeekinidae Staff et Wedekina,1910	Verb	Metadoliolina Ishii et Nogami,1961	Metadoliolina brevicylindrica (Liu,Dong et Xiao,1978)	South China	6.58	3.44	equatorial areas	Y	Fusiform	35
Verbeekinidae Staff et Wedekina,1910	Verb	Metadoliolina Ishii et Nogami,1961	Metadoliolina brevicylindrica (Liu,Dong et Xiao,1978)	South China	6.64	3.52	equatorial areas	Y	Fusiform	35
Verbeekinidae Staff et Wedekina,1910	Verb	Metadoliolina Ishii et Nogami,1961	Metadoliolina brevicylindrica (Liu,Dong et Xiao,1978)	South China	7	3.52	equatorial areas	Y	Fusiform	35
Verbeekinidae Staff et Wedekina,1910	Verb	Metadoliolina Ishii et Nogami,1961	Metadoliolina lepida (Schwager,1883)	South China	7.58	3.53	equatorial areas	Y	Fusiform	35
Verbeekinidae Staff et Wedekina,1910	Verb	Metadoliolina Ishii et Nogami,1961	Metadoliolina brevicylindrica (Liu,Dong et Xiao,1978)	South China	7.25	3.7	equatorial areas	Y	Fusiform	35
Schwagerinidae Dunbar et Henbest,1930	Schwag	Parafusulina Dunbar et Skinner,1931	Parafusulina bosei Dunbar et Skinner,1937	South China	7.91	2.2	equatorial areas	Y	Fusiform	35
Schwagerinidae Dunbar et Henbest,1930	Schwag	Parafusulina Dunbar et Skinner,1931	Parafusulina bosei Dunbar et Skinner,1937	South China	7.43	2.25	equatorial areas	Y	Fusiform	35
Schwagerinidae Dunbar et Henbest,1930	Schwag	Parafusulina Dunbar et Skinner,1931	Parafusulina bosei Dunbar et Skinner,1937	South China	7.55	2.48	equatorial areas	Y	Fusiform	35
Schwagerinidae Dunbar et Henbest,1930	Schwag	Pseudofusulina Dunbar et Skinner,1931	Pseudofusulina houziguanica Sheng,1963	South China	2.1	1.37	equatorial areas	Y	Fusiform	35
Ozawainellidae Thompson et Foster,1937	Oza	Rauserella Dunbar,1944	Rauserella erratica Dunbar,1944	South China	0.63	0.47	equatorial areas	N	Lenticular	35
Ozawainellidae Thompson et Foster,1937	Oza	Rauserella Dunbar,1944	Rauserella erratica Dunbar,1944	South China	0.87	0.68	equatorial areas	N	Lenticular	35
Schwagerinidae Dunbar et Henbest,1930	Schwag	Schwagerina Moeller,1877	Schwagerina bella Yang,1978	South China	2.9	1.06	equatorial areas	Y	Fusiform	35
Schwagerinidae Dunbar et Henbest,1930	Schwag	Schwagerina Moeller,1877	Schwagerina longipertica Chen,1956	South China	5.13	1.49	equatorial areas	Y	Fusiform	35
Schwagerinidae Dunbar et Henbest,1930	Schwag	Schwagerina Moeller,1877	Schwagerina miaoqianensis Zhu,1990	South China	5.38	1.93	equatorial areas	Y	Fusiform	35
Schwagerinidae Dunbar et Henbest,1930	Schwag	Schwagerina Moeller,1877	Schwagerina longipertica Chen,1956	South China	6.6	2	equatorial areas	Y	Fusiform	35
Schwagerinidae Dunbar et Henbest,1930	Schwag	Schwagerina Moeller,1877	Schwagerina longipertica Chen,1956	South China	5.98	2.13	equatorial areas	Y	Fusiform	35
Schwagerinidae Dunbar et Henbest,1930	Schwag	Schwagerina Moeller,1877	Schwagerina acuta (Lee,1927)	South China	6.63	2.18	equatorial areas	Y	Fusiform	35
Schwagerinidae Dunbar et Henbest,1930	Schwag	Schwagerina Moeller,1877	Schwagerina parayunnanensis Sheng,1963	South China	6.33	2.25	equatorial areas	Y	Fusiform	35
Schwagerinidae Dunbar et Henbest,1930	Schwag	Schwagerina Moeller,1877	Schwagerina parayunnanensis Sheng,1963	South China	5.43	2.3	equatorial areas	Y	Fusiform	35
Schwagerinidae Dunbar et Henbest,1930	Schwag	Schwagerina Moeller,1877	Schwagerina parayunnanensis Sheng,1963	South China	6.4	2.35	equatorial areas	Y	Fusiform	35
Schwagerinidae Dunbar et Henbest,1930	Schwag	Schwagerina Moeller,1877	Schwagerina acuta (Lee,1927)	South China	7.13	2.38	equatorial areas	Y	Fusiform	35
Schwagerinidae Dunbar et Henbest,1930	Schwag	Schwagerina Moeller,1877	Schwagerina acuta (Lee,1927)	South China	6.69	2.44	equatorial areas	Y	Fusiform	35
Schwagerinidae Dunbar et Henbest,1930	Schwag	Schwagerina Moeller,1877	Schwagerina acuta (Lee,1927)	South China	9.62	2.65	equatorial areas	Y	Fusiform	35
Schubertellidae Skinner,1931	Schu	Boultonia Lee,1927	Boultonia hubeiensis Lin,1984	South China	0.658	0.202	equatorial areas	N	Fusiform	35	[42]
Schubertellidae Skinner,1931	Schu	Boultonia Lee,1927	Boultonia hubeiensis Lin,1984	South China	1.04	0.26	equatorial areas	N	Fusiform	35
Schwagerinidae Dunbar et Henbest,1930	Schwag	Chusenella Hsu,1942	Chusenella henbesti (Chen,1956)	South China	5.43	1.6	equatorial areas	Y	Fusiform	35
Schwagerinidae Dunbar et Henbest,1930	Schwag	Chusenella Hsu,1942	Chusenella conicocylindrica Chen,1956	South China	4.442	1.725	equatorial areas	Y	Fusiform	35
Schwagerinidae Dunbar et Henbest,1930	Schwag	Chusenella Hsu,1942	Chusenella tingi Chen,1956	South China	4.64	2.24	equatorial areas	Y	Fusiform	35
Schwagerinidae Dunbar et Henbest,1930	Schwag	Chusenella Hsu,1942	Chusenella tingi Chen,1956	South China	4.9	2.38	equatorial areas	Y	Fusiform	35
Schwagerinidae Dunbar et Henbest,1930	Schwag	Chusenella Hsu,1942	Chusenella paraishanensis Lin,1978	South China	6.45	2.85	equatorial areas	Y	Fusiform	35
Schwagerinidae Dunbar et Henbest,1930	Schwag	Chusenella Hsu,1942	Chusenella paraishanensis Lin,1978	South China	7.05	3.01	equatorial areas	Y	Fusiform	35
Schwagerinidae Dunbar et Henbest,1930	Schwag	Chusenella Hsu,1942	Chusenella globularis (Gubler,1935)	South China	9.21	4.67	equatorial areas	Y	Fusiform	35
Schubertellidae Skinner,1931	Schu	Codonofusiella Dunbar et Skinner,1937	Codonofusiella asiatica K.M.Maclay, 1954	South China	0.613	0.383	equatorial areas	N	Fusiform	35
Schubertellidae Skinner,1931	Schu	Codonofusiella Dunbar et Skinner,1937	Codonofusiella asiatica K.M.Maclay, 1954	South China	0.813	0.485	equatorial areas	N	Fusiform	35
Neoschwagerinidae Dunbar et Condra,1927	Neo	Colania Lee,1933	Colania ziquiensis Lin,1984	South China	7.55	4.32	equatorial areas	Y	Fusiform	35
Neoschwagerinidae Dunbar et Condra,1927	Neo	Colania Lee,1933	Colania ziquiensis Lin,1984	South China	8.457	4.771	equatorial areas	Y	Fusiform	35
Neoschwagerinidae Dunbar et Condra,1927	Neo	Gifuelloides Kobayashi, Ross and Ross, 2010	Gifuelloides larga (Morikawa and Suzuki, 1961)	South China	8.614	5.443	equatorial areas	Y	Fusiform	35
Neoschwagerinidae Dunbar et Condra,1927	Neo	Gifuelloides Kobayashi, Ross and Ross, 2010	Gifuelloides larga (Morikawa and Suzuki, 1961)	South China	8.657	5.514	equatorial areas	Y	Fusiform	35
Verbeekinidae Staff et Wedekina,1910	Verb	Kahlerina Kochansky-Devidie et Ramovs,1955	Kahlerina siciliana Skinner et Wilde,1966	South China	0.631	0.824	equatorial areas	Y	Fusiform	35
Verbeekinidae Staff et Wedekina,1910	Verb	Kahlerina Kochansky-Devidie et Ramovs,1955	Kahlerina siciliana Skinner et Wilde,1966	South China	0.81	1.22	equatorial areas	Y	Fusiform	35
Verbeekinidae Staff et Wedekina,1910	Verb	Kahlerina Kochansky-Devidie et Ramovs,1955	Kahlerina hubeiensis Lin,1984	South China	1.34	1.33	equatorial areas	Y	Fusiform	35
Verbeekinidae Staff et Wedekina,1910	Verb	Kahlerina Kochansky-Devidie et Ramovs,1955	Kahlerina sinensis Sheng,1963	South China	2.26	2.273	equatorial areas	Y	Fusiform	35
Staffellidae A.D.Miklukho-Maklay, 1949	Staff	Leella Dunbar et Skinner,1937	Leella bellula Dunbar and Skinner, 1937	South China	2.7	1.973	equatorial areas	N	Lenticular	35
Staffellidae A.D.Miklukho-Maklay, 1949	Staff	Leella Dunbar et Skinner,1937	Leella bellula Dunbar and Skinner, 1937	South China	2.86	2.033	equatorial areas	N	Lenticular	35
Staffellidae A.D.Miklukho-Maklay, 1949	Staff	Leella Dunbar et Skinner,1937	Leella bellula Dunbar and Skinner, 1937	South China	3.47	2.49	equatorial areas	N	Lenticular	35
Verbeekinidae Staff et Wedekina,1910	Verb	Metadoliolina Ishii et Nogami,1961	Metadoliolina pulchra (Sheng,1963)	South China	7.12	3.64	equatorial areas	Y	Fusiform	35
Neoschwagerinidae Dunbar et Condra,1927	Neo	Neoschwagerina Yabe,1903	Neoschwagerina craticulifera (Schwager, 1883)	South China	4.26	2.94	equatorial areas	Y	Fusiform	35
Neoschwagerinidae Dunbar et Condra,1927	Neo	Neoschwagerina Yabe,1903	Neoschwagerina haydeni Dutkevich and Khabakov, 1934	South China	7.4	4.729	equatorial areas	Y	Fusiform	35
Schwagerinidae Dunbar et Henbest,1930	Schwag	Paraschwagerina Dunbar et Skinner,1936	Paraschwagerina quasifosteri Sheng,1956	South China	7.36	4.83	equatorial areas	Y	Fusiform	35
Verbeekinidae Staff et Wedekina,1910	Verb	Pseudodoliolina Yabe et Hanzawa,1932	Pseudodoliolina ozawai Yabe et Hanzawa,1932	South China	7.01	2.45	equatorial areas	Y	Fusiform	35
Verbeekinidae Staff et Wedekina,1910	Verb	Pseudodoliolina Yabe et Hanzawa,1932	Pseudodoliolina chinghaiensis Sheng,1958	South China	5.18	2.8	equatorial areas	Y	Fusiform	35
Schwagerinidae Dunbar et Henbest,1930	Schwag	Pseudofusulina Dunbar et Skinner,1931	Pseudofusulina xintanensis Lin,1984	South China	6.786	2.443	equatorial areas	Y	Fusiform	35
Schwagerinidae Dunbar et Henbest,1930	Schwag	Pseudofusulina Dunbar et Skinner,1931	Pseudofusulina xintanensis Lin,1984	South China	6.49	2.45	equatorial areas	Y	Fusiform	35
Verbeekinidae Staff et Wedekina,1910	Verb	Pseudokahlerina Sosnina, 1968	Pseudokahlerina xintanensis Lin,1984	South China	0.313	0.762	equatorial areas	Y	Fusiform	35
Verbeekinidae Staff et Wedekina,1910	Verb	Pseudokahlerina Sosnina, 1968	Pseudokahlerina xintanensis Lin,1984	South China	0.45	0.87	equatorial areas	Y	Fusiform	35
Ozawainellidae Thompson et Foster,1937	Oza	Rauserella Dunbar,1944	Rauserella oblonga Sosnina, 1981	South China	3.55	0.78	equatorial areas	N	Lenticular	35
Ozawainellidae Thompson et Foster,1937	Oza	Rauserella Dunbar,1944	Rauserella erratica Dunbar,1944	South China	2.247	0.88	equatorial areas	N	Lenticular	35
Schwagerinidae Dunbar et Henbest,1930	Schwag	Rugosochusenella Skinner et Wilde,1965	Rugosochusenella longjiangensis Lin,1984	South China	5.3	2.01	equatorial areas	Y	Fusiform	35
Schwagerinidae Dunbar et Henbest,1930	Schwag	Rugosochusenella Skinner et Wilde,1965	Rugosochusenella longjiangensis Lin,1984	South China	6.31	2.83	equatorial areas	Y	Fusiform	35
Schwagerinidae Dunbar et Henbest,1930	Schwag	Rugososchwagerina M.-Maclay,1956	Rugososchwagerina fosteri Thompson et Miller,1935	South China	7.51	5.78	equatorial areas	Y	Fusiform	35
Schwagerinidae Dunbar et Henbest,1930	Schwag	Schwagerina Moeller,1877	Schwagerina longipertica Chen,1956	South China	5.81	1.61	equatorial areas	Y	Fusiform	35
Schwagerinidae Dunbar et Henbest,1930	Schwag	Schwagerina Moeller,1877	Schwagerina quasiregularis Sheng,1963	South China	4.33	1.73	equatorial areas	Y	Fusiform	35
Schwagerinidae Dunbar et Henbest,1930	Schwag	Schwagerina Moeller,1877	Schwagerina quasiregularis Sheng,1963	South China	4.71	1.81	equatorial areas	Y	Fusiform	35
Schwagerinidae Dunbar et Henbest,1930	Schwag	Schwagerina Moeller,1877	Schwagerina longa Yang,1978	South China	8.214	2.143	equatorial areas	Y	Fusiform	35
Schwagerinidae Dunbar et Henbest,1930	Schwag	Schwagerina Moeller,1877	Schwagerina longa Yang,1978	South China	8.514	2.243	equatorial areas	Y	Fusiform	35
Schwagerinidae Dunbar et Henbest,1930	Schwag	Schwagerina Moeller,1877	Schwagerina pseudocompacta Sheng,1956	South China	7.6	2.41	equatorial areas	Y	Fusiform	35
Schwagerinidae Dunbar et Henbest,1930	Schwag	Schwagerina Moeller,1877	Schwagerina longipertica Chen,1956	South China	7.8	2.65	equatorial areas	Y	Fusiform	35
Schwagerinidae Dunbar et Henbest,1930	Schwag	Schwagerina Moeller,1877	Schwagerina hupehensis Chen,1956	South China	12.1	3.36	equatorial areas	Y	Fusiform	35
Schwagerinidae Dunbar et Henbest,1930	Schwag	Schwagerina Moeller,1877	Schwagerina serrata Ding,1978	South China	14.388	3.713	equatorial areas	Y	Fusiform	35
Neoschwagerinidae Dunbar et Condra,1927	Neo	Sumatrina Volz,1904	Sumatrina fusiformis Sheng,1958	South China	6.87	1.64	equatorial areas	Y	Fusiform	35
Neoschwagerinidae Dunbar et Condra,1927	Neo	Sumatrina Volz,1904	Sumatrina longissima Deprat,1914	South China	8.257	2.229	equatorial areas	Y	Fusiform	35
Neoschwagerinidae Dunbar et Condra,1927	Neo	Yabeina Deprat,1914	Yabeina kwangsiana (Lee,1933)	South China	5.7	3.02	equatorial areas	Y	Fusiform	35
Neoschwagerinidae Dunbar et Condra,1927	Neo	Yabeina Deprat,1914	Yabeina quasigubleri Liu,Xiao et Dong,1978	South China	8.01	4.04	equatorial areas	Y	Fusiform	35
Neoschwagerinidae Dunbar et Condra,1927	Neo	Afghanella Thompson,1946	Afghanella schencki Thompson, 1946	Qinling Belt	4	2.27	equatorial areas	Y	Fusiform	28	[43]
Neoschwagerinidae Dunbar et Condra,1927	Neo	Afghanella Thompson,1946	Afghanella schencki Thompson, 1946	Qinling Belt	4.93	2.5	equatorial areas	Y	Fusiform	28
Neoschwagerinidae Dunbar et Condra,1927	Neo	Afghanella Thompson,1946	Afghanella schencki Thompson, 1946	Qinling Belt	4.9	2.56	equatorial areas	Y	Fusiform	28
Neoschwagerinidae Dunbar et Condra,1927	Neo	Afghanella Thompson,1946	Afghanella sumatrinaeformis (Gubler, 1935)	Qinling Belt	4.74	2.88	equatorial areas	Y	Fusiform	28
Neoschwagerinidae Dunbar et Condra,1927	Neo	Afghanella Thompson,1946	Afghanella gongxianensis Yang,1978	Qinling Belt	5.12	2.88	equatorial areas	Y	Fusiform	28
Verbeekinidae Staff et Wedekina,1910	Verb	Armenina M.-Maclay,1955	Armenina crassispira (Chen,1956)	Qinling Belt	3.04	2.78	equatorial areas	Y	Fusiform	28
Schwagerinidae Dunbar et Henbest,1930	Schwag	Chusenella Hsu,1942	Chusenella sinensis Sheng,1963	South China	4.16	1.38	equatorial areas	Y	Fusiform	35
Schwagerinidae Dunbar et Henbest,1930	Schwag	Chusenella Hsu,1942	Chusenella dorashamensis Rosovskaya, 1965	South China	4.48	1.86	equatorial areas	Y	Fusiform	35
Schwagerinidae Dunbar et Henbest,1930	Schwag	Chusenella Hsu,1942	Chusenella dorashamensis Rosovskaya, 1965	South China	5.008	2.167	equatorial areas	Y	Fusiform	35
Schwagerinidae Dunbar et Henbest,1930	Schwag	Chusenella Hsu,1942	Chusenella paraconicocylindrica Yang,1978	South China	8.06	2.21	equatorial areas	Y	Fusiform	35
Verbeekinidae Staff et Wedekina,1910	Verb	Kahlerina Kochansky-Devidie et Ramovs,1955	Kahlerina minima Sheng,1963	Qinling Belt	0.32	0.35	equatorial areas	Y	Fusiform	28
Neoschwagerinidae Dunbar et Condra,1927	Neo	Neoschwagerina Yabe,1903	Neoschwagerina simplex Ozawa,1927	Qinling Belt	3.03	2.47	equatorial areas	Y	Fusiform	28
Neoschwagerinidae Dunbar et Condra,1927	Neo	Neoschwagerina Yabe,1903	Neoschwagerina simplex Ozawa,1927	Qinling Belt	4.192	3.333	equatorial areas	Y	Fusiform	28
Neoschwagerinidae Dunbar et Condra,1927	Neo	Neoschwagerina Yabe,1903	Neoschwagerina cheni Sheng,1958	Qinling Belt	4.16	3.8	equatorial areas	Y	Fusiform	28
Neoschwagerinidae Dunbar et Condra,1927	Neo	Neoschwagerina Yabe,1903	Neoschwagerina simplex Ozawa,1927	South China	4.16	3.36	equatorial areas	Y	Fusiform	35
Schwagerinidae Dunbar et Henbest,1930	Schwag	Parafusulina Dunbar et Skinner,1931	Parafusulina postkraffti Leven, 1967	Qinling Belt	5.77	2.1	equatorial areas	Y	Fusiform	28
Schwagerinidae Dunbar et Henbest,1930	Schwag	Parafusulina Dunbar et Skinner,1931	Parafusulina postkraffti Leven, 1967	Qinling Belt	12	4.32	equatorial areas	Y	Fusiform	28
Schwagerinidae Dunbar et Henbest,1930	Schwag	Parafusulina Dunbar et Skinner,1931	Parafusulina yiwaensis Chen,1996	South China	6.5	1.76	equatorial areas	Y	Fusiform	35
Schwagerinidae Dunbar et Henbest,1930	Schwag	Parafusulina Dunbar et Skinner,1931	Parafusulina yiwaensis Chen,1996	South China	6.56	1.92	equatorial areas	Y	Fusiform	35
Schwagerinidae Dunbar et Henbest,1930	Schwag	Parafusulina Dunbar et Skinner,1931	Parafusulina yabei Hanzawa, 1942	South China	7.36	3.1	equatorial areas	Y	Fusiform	35
Schwagerinidae Dunbar et Henbest,1930	Schwag	Parafusulina Dunbar et Skinner,1931	Parafusulina rothi Dunbar et Condra,1936	South China	14.4	3.49	equatorial areas	Y	Fusiform	35
Schwagerinidae Dunbar et Henbest,1930	Schwag	Parafusulina Dunbar et Skinner,1931	Parafusulina multiseptata (Schellwien,1898)	South China	10.26	3.98	equatorial areas	Y	Fusiform	35
Verbeekinidae Staff et Wedekina,1910	Verb	Pseudodoliolina Yabe et Hanzawa,1932	Pseudodoliolina oliviformis Thompson, Wheeler and Danner, 1950	South China	3.62	1.66	equatorial areas	Y	Fusiform	35
Verbeekinidae Staff et Wedekina,1910	Verb	Pseudodoliolina Yabe et Hanzawa,1932	Pseudodoliolina chinghaiensis Sheng,1958	South China	3.36	1.79	equatorial areas	Y	Fusiform	35
Verbeekinidae Staff et Wedekina,1910	Verb	Pseudodoliolina Yabe et Hanzawa,1932	Pseudodoliolina ozawai Yabe et Hanzawa,1932	South China	4.61	2	equatorial areas	Y	Fusiform	35
Schwagerinidae Dunbar et Henbest,1930	Schwag	Pseudofusulina Dunbar et Skinner,1931	Pseudofusulina yunnanensis (Chen, 1956)	Qinling Belt	6.53	2.78	equatorial areas	Y	Fusiform	28
Schwagerinidae Dunbar et Henbest,1930	Schwag	Schwagerina Moeller,1877	Schwagerina quasiregularis Sheng,1963	South China	4.8	1.82	equatorial areas	Y	Fusiform	35
Neoschwagerinidae Dunbar et Condra,1927	Neo	Sumatrina Volz,1904	Sumatrina annae Volz,1904	Qinling Belt	7.08	2.94	equatorial areas	Y	Fusiform	28
Verbeekinidae Staff et Wedekina,1910	Verb	Verbeekina Staff,1909	Verbeekina verbeeki (Geinitz,1876)	Qinling Belt	6.21	5.6	equatorial areas	Y	Fusiform	28
Verbeekinidae Staff et Wedekina,1910	Verb	Verbeekina Staff,1909	Verbeekina intermedia Zhang et Dong,1986	South China	5.76	5.6	equatorial areas	Y	Fusiform	35
Schwagerinidae Dunbar et Henbest,1930	Schwag	Chusenella Hsu,1942	Chusenella tieni (Chen,1956)	South China	3.05	1.04	equatorial areas	Y	Fusiform	35	[44]
Schwagerinidae Dunbar et Henbest,1930	Schwag	Chusenella Hsu,1942	Chusenella huayunica Chang	South China	5.27	1.58	equatorial areas	Y	Fusiform	35
Schwagerinidae Dunbar et Henbest,1930	Schwag	Chusenella Hsu,1942	Chusenella huayunica Chang	South China	5.27	1.58	equatorial areas	Y	Fusiform	35
Schwagerinidae Dunbar et Henbest,1930	Schwag	Chusenella Hsu,1942	Chusenella sinensis Sheng,1963	South China	5.09	1.82	equatorial areas	Y	Fusiform	35
Schwagerinidae Dunbar et Henbest,1930	Schwag	Chusenella Hsu,1942	Chusenella conicocylindrica Chen,1956	South China	7.2	2.11	equatorial areas	Y	Fusiform	35
Schwagerinidae Dunbar et Henbest,1930	Schwag	Chusenella Hsu,1942	Chusenella henbesti (Chen,1956)	South China	7.61	2.54	equatorial areas	Y	Fusiform	35
Schwagerinidae Dunbar et Henbest,1930	Schwag	Chusenella Hsu,1942	Chusenella sinensis Sheng,1963	South China	6.14	2.78	equatorial areas	Y	Fusiform	35
Schwagerinidae Dunbar et Henbest,1930	Schwag	Chusenella Hsu,1942	Chusenella plana Ding,1978	South China	10.54	3.38	equatorial areas	Y	Fusiform	35
Schwagerinidae Dunbar et Henbest,1930	Schwag	Chusenella Hsu,1942	Chusenella plana Ding,1978	South China	11.52	3.74	equatorial areas	Y	Fusiform	35
Schwagerinidae Dunbar et Henbest,1930	Schwag	Chusenella Hsu,1942	Chusenella conicocylindrica Chen,1956	South China	10.09	3.76	equatorial areas	Y	Fusiform	35
Schwagerinidae Dunbar et Henbest,1930	Schwag	Chusenella Hsu,1942	Chusenella douvillei (Colani,1924)	South China	7.59	4.06	equatorial areas	Y	Fusiform	35
Schwagerinidae Dunbar et Henbest,1930	Schwag	Chusenella Hsu,1942	Chusenella globularis (Gubler,1935)	South China	6.72	4.4	equatorial areas	Y	Fusiform	35
Verbeekinidae Staff et Wedekina,1910	Verb	Metadoliolina Ishii et Nogami,1961	Metadoliolina pulchra (Sheng,1963)	South China	4.82	2.34	equatorial areas	Y	Fusiform	35
Neoschwagerinidae Dunbar et Condra,1927	Neo	Neoschwagerina Yabe,1903	Neoschwagerina haydeni Dutkevich and Khabakov, 1934	South China	4.35	3.1	equatorial areas	Y	Fusiform	35
Neoschwagerinidae Dunbar et Condra,1927	Neo	Neoschwagerina Yabe,1903	Neoschwagerina glintzboeckeli Skinner et Widle,1967	South China	4.66	3.46	equatorial areas	Y	Fusiform	35
Neoschwagerinidae Dunbar et Condra,1927	Neo	Neoschwagerina Yabe,1903	Neoschwagerina fusiformis Skinner and Wilde, 1967	South China	6.77	4.43	equatorial areas	Y	Fusiform	35
Verbeekinidae Staff et Wedekina,1910	Verb	Pseudodoliolina Yabe et Hanzawa,1932	Pseudodoliolina ozawai Yabe et Hanzawa,1932	South China	4.74	2.207	equatorial areas	Y	Fusiform	35
Verbeekinidae Staff et Wedekina,1910	Verb	Pseudodoliolina Yabe et Hanzawa,1932	Pseudodoliolina pseudolepida (Deprat,1912)	South China	5.833	2.573	equatorial areas	Y	Fusiform	35
Schwagerinidae Dunbar et Henbest,1930	Schwag	Rugososchwagerina M.-Maclay,1956	Rugososchwagerina altimurica Leven, 1997	South China	6.99	5.69	equatorial areas	Y	Fusiform	35
Schwagerinidae Dunbar et Henbest,1930	Schwag	Rugososchwagerina M.-Maclay,1956	Rugososchwagerina altimurica Leven, 1997	South China	7.88	5.71	equatorial areas	Y	Fusiform	35
Schwagerinidae Dunbar et Henbest,1930	Schwag	Rugososchwagerina M.-Maclay,1956	Rugososchwagerina altimurica Leven, 1997	South China	5.86	6.11	equatorial areas	Y	Fusiform	35
Schwagerinidae Dunbar et Henbest,1930	Schwag	Schwagerina Moeller,1877	Schwagerina serrata Ding,1978	South China	5.89	1.105	equatorial areas	Y	Fusiform	35
Schwagerinidae Dunbar et Henbest,1930	Schwag	Schwagerina Moeller,1877	Schwagerina tienchiaensis Chen,1956	South China	4.33	1.69	equatorial areas	Y	Fusiform	35
[truncated: 4,842 more rows]
